# Supplementary material
Source: publisher figshare collection journal article supplement (https://acs.figshare.com/ndownloader/files/4448254)
Supplement: Supplementary file 1 [file 4448254]

 
data_cui115k
 
_audit_creation_method            SHELXL-97
_chemical_name_systematic
;
 ?
;
_chemical_name_common             ?
_chemical_melting_point           ?
_chemical_formula_moiety          'C12 H30 Cu4 I4 S3'
_chemical_formula_sum
 'C12 H30 Cu4 I4 S3'
_chemical_formula_weight          1032.37
 
loop_
 _atom_type_symbol
 _atom_type_description
 _atom_type_scat_dispersion_real
 _atom_type_scat_dispersion_imag
 _atom_type_scat_source
 'C'  'C'   0.0030   0.0020
 'International Tables Vol C Tables 4.2.6.8 and 6.1.1.4'
 'H'  'H'   0.0000   0.0000
 'International Tables Vol C Tables 4.2.6.8 and 6.1.1.4'
 'S'  'S'   0.1250   0.1230
 'International Tables Vol C Tables 4.2.6.8 and 6.1.1.4'
 'I'  'I'  -0.4740   1.8120
 'International Tables Vol C Tables 4.2.6.8 and 6.1.1.4'
 'Cu'  'Cu'   0.3200   1.2650
 'International Tables Vol C Tables 4.2.6.8 and 6.1.1.4'
 
_symmetry_cell_setting            monoclinic
_symmetry_space_group_name_H-M    'P 21/a'
_symmetry_space_group_name_hall   '-P 2yab'
 
loop_
 _symmetry_equiv_pos_as_xyz
 'x, y, z'
 '-x+1/2, y+1/2, -z'
 '-x, -y, -z'
 'x-1/2, -y-1/2, z'
 
_cell_length_a                    13.1104(4)
_cell_length_b                    11.2959(3)
_cell_length_c                    18.1129(5)
_cell_angle_alpha                 90.00
_cell_angle_beta                  102.8740(10)
_cell_angle_gamma                 90.00
_cell_volume                      2614.98(13)
_cell_formula_units_Z             4
_cell_measurement_temperature     115(2)
_cell_measurement_reflns_used     5622
_cell_measurement_theta_min       0.998
_cell_measurement_theta_max       27.485
 
_exptl_crystal_description        prism
_exptl_crystal_colour             colourless
_exptl_crystal_size_max           0.20
_exptl_crystal_size_mid           0.20
_exptl_crystal_size_min           0.12
_exptl_crystal_density_meas       ?
_exptl_crystal_density_diffrn     2.622
_exptl_crystal_density_method     'not measured'
_exptl_crystal_F_000              1912
_exptl_absorpt_coefficient_mu     8.167
_exptl_absorpt_correction_type    multi-scan
_exptl_absorpt_correction_T_min   0.1469
_exptl_absorpt_correction_T_max   0.2559
_exptl_absorpt_process_details    
'Blessing, R. (1995) Acta Crystallogr., A51, 33-38'
 
_exptl_special_details
;
 ?
;
 
_diffrn_ambient_temperature       115(2)
_diffrn_radiation_wavelength      0.71073
_diffrn_radiation_type            MoK\a
_diffrn_radiation_source          'fine-focus sealed tube'
_diffrn_radiation_monochromator   graphite
_diffrn_measurement_device_type   'Nonius Kappa APEX-II'
_diffrn_measurement_method        ?
_diffrn_detector_area_resol_mean  ?
_diffrn_standards_number          ?
_diffrn_standards_interval_count  ?
_diffrn_standards_interval_time   ?
_diffrn_standards_decay_%         ?
_diffrn_reflns_number             10644
_diffrn_reflns_av_R_equivalents   0.0230
_diffrn_reflns_av_sigmaI/netI     0.0300
_diffrn_reflns_limit_h_min        -16
_diffrn_reflns_limit_h_max        17
_diffrn_reflns_limit_k_min        -14
_diffrn_reflns_limit_k_max        11
_diffrn_reflns_limit_l_min        -23
_diffrn_reflns_limit_l_max        23
_diffrn_reflns_theta_min          2.41
_diffrn_reflns_theta_max          27.48
_reflns_number_total              5906
_reflns_number_gt                 5559
_reflns_threshold_expression      >2sigma(I)
 
_computing_data_collection        'Collect (Bruker AXS BV, 1997-2004)'
_computing_cell_refinement        'HKL Scalepack (Otwinowski & Minor 1997)'
_computing_data_reduction         
'HKL Denzo and Scalepack (Otwinowski & Minor 1997)'
_computing_structure_solution     'SIR92 (Altomare et al., 1993)'
_computing_structure_refinement   'SHELXL-97 (Sheldrick, 1997)'
_computing_molecular_graphics     'ORTEP3 (Farrugia,1997)'
_computing_publication_material   
'WinGX publication routines (Farrugia, 1999)'
 
_refine_special_details
;
 Refinement of F^2^ against ALL reflections.  The weighted R-factor wR and
 goodness of fit S are based on F^2^, conventional R-factors R are based
 on F, with F set to zero for negative F^2^. The threshold expression of
 F^2^ > 2sigma(F^2^) is used only for calculating R-factors(gt) etc. and is
 not relevant to the choice of reflections for refinement.  R-factors based
 on F^2^ are statistically about twice as large as those based on F, and R-
 factors based on ALL data will be even larger.
;
 
_refine_ls_structure_factor_coef  Fsqd
_refine_ls_matrix_type            full
_refine_ls_weighting_scheme       calc
_refine_ls_weighting_details
 'calc w=1/[\s^2^(Fo^2^)+(0.0097P)^2^+18.6316P] where P=(Fo^2^+2Fc^2^)/3'
_atom_sites_solution_primary      direct
_atom_sites_solution_secondary    difmap
_atom_sites_solution_hydrogens    geom
_refine_ls_hydrogen_treatment     noref
_refine_ls_extinction_method      none
_refine_ls_extinction_coef        ?
_refine_ls_number_reflns          5906
_refine_ls_number_parameters      214
_refine_ls_number_restraints      0
_refine_ls_R_factor_all           0.0336
_refine_ls_R_factor_gt            0.0305
_refine_ls_wR_factor_ref          0.0676
_refine_ls_wR_factor_gt           0.0661
_refine_ls_goodness_of_fit_ref    1.189
_refine_ls_restrained_S_all       1.189
_refine_ls_shift/su_max           0.001
_refine_ls_shift/su_mean          0.000
 
loop_
 _atom_site_label
 _atom_site_type_symbol
 _atom_site_fract_x
 _atom_site_fract_y
 _atom_site_fract_z
 _atom_site_U_iso_or_equiv
 _atom_site_adp_type
 _atom_site_occupancy
 _atom_site_symmetry_multiplicity
 _atom_site_calc_flag
 _atom_site_refinement_flags
 _atom_site_disorder_assembly
 _atom_site_disorder_group
I2 I 0.81938(2) 0.34529(3) 0.728871(18) 0.01445(7) Uani 1 1 d . . .
I1 I 0.86457(2) 0.08017(3) 0.913167(17) 0.01408(7) Uani 1 1 d . . .
I4 I 0.95124(2) 0.00161(3) 0.691236(18) 0.01517(7) Uani 1 1 d . . .
I3 I 0.61970(2) 0.00985(3) 0.716550(19) 0.01613(8) Uani 1 1 d . . .
Cu3 Cu 0.77462(5) 0.12461(6) 0.66775(4) 0.01664(13) Uani 1 1 d . . .
Cu4 Cu 0.93290(5) 0.16636(5) 0.79314(4) 0.01467(13) Uani 1 1 d . . .
Cu1 Cu 0.81826(5) -0.04039(6) 0.78139(4) 0.01763(13) Uani 1 1 d . . .
Cu2 Cu 0.72627(5) 0.18498(6) 0.79872(4) 0.01564(13) Uani 1 1 d . . .
S2 S 0.69237(11) 0.17906(12) 0.54660(7) 0.0199(3) Uani 1 1 d . . .
S1 S 0.82194(11) -0.23697(11) 0.81701(8) 0.0190(3) Uani 1 1 d . . .
S3 S 1.10641(9) 0.21156(11) 0.85133(7) 0.0133(2) Uani 1 1 d . . .
C7 C 0.5791(5) 0.2591(6) 0.5630(3) 0.0309(14) Uani 1 1 d . . .
H7A H 0.5410 0.2078 0.5903 0.037 Uiso 1 1 calc R . .
H7B H 0.6034 0.3267 0.5951 0.037 Uiso 1 1 calc R . .
C8 C 0.5047(5) 0.3023(7) 0.4921(4) 0.0380(16) Uani 1 1 d . . .
H8A H 0.5422 0.3504 0.4633 0.057 Uiso 1 1 calc R . .
H8B H 0.4502 0.3484 0.5057 0.057 Uiso 1 1 calc R . .
H8C H 0.4745 0.2357 0.4621 0.057 Uiso 1 1 calc R . .
C5 C 0.6303(5) 0.0469(6) 0.5010(3) 0.0286(13) Uani 1 1 d . . .
H5A H 0.5864 0.0121 0.5319 0.034 Uiso 1 1 calc R . .
H5B H 0.5862 0.0673 0.4522 0.034 Uiso 1 1 calc R . .
C6 C 0.7122(6) -0.0415(6) 0.4902(4) 0.0382(16) Uani 1 1 d . . .
H6A H 0.7568 -0.0060 0.4610 0.057 Uiso 1 1 calc R . .
H6B H 0.6785 -0.1098 0.4640 0.057 Uiso 1 1 calc R . .
H6C H 0.7532 -0.0650 0.5388 0.057 Uiso 1 1 calc R . .
C3 C 0.7321(5) -0.3155(5) 0.7421(4) 0.0290(13) Uani 1 1 d . . .
H3A H 0.7351 -0.3992 0.7546 0.035 Uiso 1 1 calc R . .
H3B H 0.6616 -0.2885 0.7411 0.035 Uiso 1 1 calc R . .
C4 C 0.7526(5) -0.3011(6) 0.6631(4) 0.0363(15) Uani 1 1 d . . .
H4A H 0.7562 -0.2183 0.6518 0.054 Uiso 1 1 calc R . .
H4B H 0.6969 -0.3373 0.6267 0.054 Uiso 1 1 calc R . .
H4C H 0.8178 -0.3384 0.6611 0.054 Uiso 1 1 calc R . .
C1 C 0.9458(5) -0.3012(5) 0.8091(3) 0.0242(12) Uani 1 1 d . . .
H1A H 0.9405 -0.3869 0.8083 0.029 Uiso 1 1 calc R . .
H1B H 0.9628 -0.2759 0.7621 0.029 Uiso 1 1 calc R . .
C2 C 1.0321(5) -0.2624(6) 0.8759(4) 0.0311(13) Uani 1 1 d . . .
H2A H 1.0341 -0.1775 0.8786 0.047 Uiso 1 1 calc R . .
H2B H 1.0983 -0.2914 0.8693 0.047 Uiso 1 1 calc R . .
H2C H 1.0184 -0.2937 0.9220 0.047 Uiso 1 1 calc R . .
C9 C 1.1561(4) 0.0652(5) 0.8820(3) 0.0206(11) Uani 1 1 d . . .
H9A H 1.1093 0.0288 0.9099 0.025 Uiso 1 1 calc R . .
H9B H 1.1551 0.0170 0.8375 0.025 Uiso 1 1 calc R . .
C10 C 1.2664(4) 0.0644(6) 0.9314(4) 0.0290(14) Uani 1 1 d . . .
H10A H 1.3134 0.1013 0.9046 0.043 Uiso 1 1 calc R . .
H10B H 1.2881 -0.0158 0.9434 0.043 Uiso 1 1 calc R . .
H10C H 1.2674 0.1072 0.9773 0.043 Uiso 1 1 calc R . .
C11 C 1.1051(4) 0.2820(5) 0.9413(3) 0.0239(12) Uani 1 1 d . . .
H11A H 1.0649 0.2345 0.9692 0.029 Uiso 1 1 calc R . .
H11B H 1.1759 0.2889 0.9714 0.029 Uiso 1 1 calc R . .
C12 C 1.0566(5) 0.4033(6) 0.9261(4) 0.0359(16) Uani 1 1 d . . .
H12A H 1.1009 0.4526 0.9034 0.054 Uiso 1 1 calc R . .
H12B H 1.0489 0.4381 0.9729 0.054 Uiso 1 1 calc R . .
H12C H 0.9891 0.3965 0.8923 0.054 Uiso 1 1 calc R . .
 
loop_
 _atom_site_aniso_label
 _atom_site_aniso_U_11
 _atom_site_aniso_U_22
 _atom_site_aniso_U_33
 _atom_site_aniso_U_23
 _atom_site_aniso_U_13
 _atom_site_aniso_U_12
I2 0.01648(15) 0.01162(14) 0.01564(15) 0.00118(11) 0.00441(12) -0.00045(11)
I1 0.01212(14) 0.01879(15) 0.01203(15) 0.00177(12) 0.00418(11) 0.00048(12)
I4 0.01418(15) 0.01765(15) 0.01479(15) -0.00253(12) 0.00556(12) 0.00181(12)
I3 0.01255(15) 0.01604(15) 0.01997(17) 0.00031(12) 0.00401(12) -0.00201(12)
Cu3 0.0161(3) 0.0193(3) 0.0142(3) -0.0004(2) 0.0028(2) 0.0014(2)
Cu4 0.0118(3) 0.0166(3) 0.0154(3) -0.0011(2) 0.0026(2) -0.0003(2)
Cu1 0.0184(3) 0.0140(3) 0.0210(3) 0.0005(2) 0.0055(3) 0.0007(2)
Cu2 0.0144(3) 0.0183(3) 0.0159(3) -0.0002(2) 0.0070(2) 0.0013(2)
S2 0.0211(6) 0.0233(6) 0.0151(6) 0.0017(5) 0.0036(5) 0.0011(5)
S1 0.0217(6) 0.0150(6) 0.0222(6) 0.0011(5) 0.0094(5) 0.0021(5)
S3 0.0106(5) 0.0172(5) 0.0125(5) -0.0013(4) 0.0037(4) -0.0012(4)
C7 0.028(3) 0.044(4) 0.019(3) 0.005(3) 0.002(2) 0.010(3)
C8 0.034(3) 0.050(4) 0.029(3) 0.016(3) 0.003(3) 0.016(3)
C5 0.033(3) 0.035(3) 0.016(3) -0.003(2) 0.001(2) -0.008(3)
C6 0.058(5) 0.027(3) 0.024(3) -0.010(3) -0.001(3) -0.001(3)
C3 0.024(3) 0.016(3) 0.047(4) -0.005(3) 0.006(3) -0.006(2)
C4 0.037(4) 0.036(3) 0.032(3) -0.009(3) -0.001(3) -0.002(3)
C1 0.030(3) 0.021(3) 0.023(3) 0.001(2) 0.010(2) 0.006(2)
C2 0.028(3) 0.035(3) 0.030(3) -0.004(3) 0.004(3) 0.002(3)
C9 0.017(2) 0.020(3) 0.024(3) 0.008(2) 0.003(2) 0.003(2)
C10 0.013(2) 0.040(3) 0.035(3) 0.020(3) 0.008(2) 0.004(2)
C11 0.016(2) 0.040(3) 0.019(3) -0.014(2) 0.011(2) -0.010(2)
C12 0.017(3) 0.052(4) 0.038(4) -0.032(3) 0.006(3) 0.000(3)
 
_geom_special_details
;
 All esds (except the esd in the dihedral angle between two l.s. planes)
 are estimated using the full covariance matrix.  The cell esds are taken
 into account individually in the estimation of esds in distances, angles
 and torsion angles; correlations between esds in cell parameters are only
 used when they are defined by crystal symmetry.  An approximate (isotropic)
 treatment of cell esds is used for estimating esds involving l.s. planes.
;
 
loop_
 _geom_bond_atom_site_label_1
 _geom_bond_atom_site_label_2
 _geom_bond_distance
 _geom_bond_site_symmetry_2
 _geom_bond_publ_flag
I2 Cu4 2.6237(7) . ?
I2 Cu2 2.6567(7) . ?
I2 Cu3 2.7376(7) . ?
I1 Cu1 2.6972(7) . ?
I1 Cu2 2.7040(7) . ?
I1 Cu4 2.7101(7) . ?
I4 Cu3 2.6522(7) . ?
I4 Cu4 2.6694(7) . ?
I4 Cu1 2.6831(7) . ?
I3 Cu1 2.6676(7) . ?
I3 Cu2 2.6747(7) . ?
I3 Cu3 2.7180(7) . ?
Cu3 S2 2.3026(14) . ?
Cu3 Cu2 2.6767(9) . ?
Cu3 Cu1 2.7410(9) . ?
Cu3 Cu4 2.7544(9) . ?
Cu4 S3 2.3405(13) . ?
Cu4 Cu2 2.7413(9) . ?
Cu4 Cu1 2.7596(9) . ?
Cu1 S1 2.3099(14) . ?
Cu1 Cu2 2.8641(9) . ?
Cu2 S3 2.3261(13) 4_565 ?
S2 C5 1.809(6) . ?
S2 C7 1.818(6) . ?
S1 C1 1.814(6) . ?
S1 C3 1.818(6) . ?
S3 C9 1.818(5) . ?
S3 C11 1.816(5) . ?
S3 Cu2 2.3261(13) 4_665 ?
C7 C8 1.511(8) . ?
C7 H7A 0.9700 . ?
C7 H7B 0.9700 . ?
C8 H8A 0.9600 . ?
C8 H8B 0.9600 . ?
C8 H8C 0.9600 . ?
C5 C6 1.510(9) . ?
C5 H5A 0.9700 . ?
C5 H5B 0.9700 . ?
C6 H6A 0.9600 . ?
C6 H6B 0.9600 . ?
C6 H6C 0.9600 . ?
C3 C4 1.523(9) . ?
C3 H3A 0.9700 . ?
C3 H3B 0.9700 . ?
C4 H4A 0.9600 . ?
C4 H4B 0.9600 . ?
C4 H4C 0.9600 . ?
C1 C2 1.526(8) . ?
C1 H1A 0.9700 . ?
C1 H1B 0.9700 . ?
C2 H2A 0.9600 . ?
C2 H2B 0.9600 . ?
C2 H2C 0.9600 . ?
C9 C10 1.522(7) . ?
C9 H9A 0.9700 . ?
C9 H9B 0.9700 . ?
C10 H10A 0.9600 . ?
C10 H10B 0.9600 . ?
C10 H10C 0.9600 . ?
C11 C12 1.510(9) . ?
C11 H11A 0.9700 . ?
C11 H11B 0.9700 . ?
C12 H12A 0.9600 . ?
C12 H12B 0.9600 . ?
C12 H12C 0.9600 . ?
 
loop_
 _geom_angle_atom_site_label_1
 _geom_angle_atom_site_label_2
 _geom_angle_atom_site_label_3
 _geom_angle
 _geom_angle_site_symmetry_1
 _geom_angle_site_symmetry_3
 _geom_angle_publ_flag
Cu4 I2 Cu2 62.55(2) . . ?
Cu4 I2 Cu3 61.79(2) . . ?
Cu2 I2 Cu3 59.48(2) . . ?
Cu1 I1 Cu2 64.05(2) . . ?
Cu1 I1 Cu4 61.37(2) . . ?
Cu2 I1 Cu4 60.84(2) . . ?
Cu3 I4 Cu4 62.34(2) . . ?
Cu3 I4 Cu1 61.83(2) . . ?
Cu4 I4 Cu1 62.07(2) . . ?
Cu1 I3 Cu2 64.84(2) . . ?
Cu1 I3 Cu3 61.18(2) . . ?
Cu2 I3 Cu3 59.51(2) . . ?
S2 Cu3 I4 119.97(4) . . ?
S2 Cu3 Cu2 128.57(5) . . ?
I4 Cu3 Cu2 111.22(3) . . ?
S2 Cu3 I3 102.25(4) . . ?
I4 Cu3 I3 112.76(2) . . ?
Cu2 Cu3 I3 59.44(2) . . ?
S2 Cu3 I2 98.91(4) . . ?
I4 Cu3 I2 108.14(2) . . ?
Cu2 Cu3 I2 58.76(2) . . ?
I3 Cu3 I2 114.27(3) . . ?
S2 Cu3 Cu1 150.73(5) . . ?
I4 Cu3 Cu1 59.64(2) . . ?
Cu2 Cu3 Cu1 63.81(2) . . ?
I3 Cu3 Cu1 58.50(2) . . ?
I2 Cu3 Cu1 108.99(3) . . ?
S2 Cu3 Cu4 147.88(5) . . ?
I4 Cu3 Cu4 59.137(19) . . ?
Cu2 Cu3 Cu4 60.61(2) . . ?
I3 Cu3 Cu4 107.08(3) . . ?
I2 Cu3 Cu4 57.073(19) . . ?
Cu1 Cu3 Cu4 60.29(2) . . ?
S3 Cu4 I2 115.47(4) . . ?
S3 Cu4 I4 103.61(4) . . ?
I2 Cu4 I4 111.09(2) . . ?
S3 Cu4 I1 100.31(4) . . ?
I2 Cu4 I1 112.11(2) . . ?
I4 Cu4 I1 113.64(2) . . ?
S3 Cu4 Cu2 146.71(4) . . ?
I2 Cu4 Cu2 59.32(2) . . ?
I4 Cu4 Cu2 108.72(3) . . ?
I1 Cu4 Cu2 59.47(2) . . ?
S3 Cu4 Cu3 152.47(4) . . ?
I2 Cu4 Cu3 61.14(2) . . ?
I4 Cu4 Cu3 58.52(2) . . ?
I1 Cu4 Cu3 106.08(3) . . ?
Cu2 Cu4 Cu3 58.29(2) . . ?
S3 Cu4 Cu1 132.64(4) . . ?
I2 Cu4 Cu1 111.86(3) . . ?
I4 Cu4 Cu1 59.21(2) . . ?
I1 Cu4 Cu1 59.08(2) . . ?
Cu2 Cu4 Cu1 62.75(2) . . ?
Cu3 Cu4 Cu1 59.62(2) . . ?
S1 Cu1 I3 106.56(4) . . ?
S1 Cu1 I4 111.35(4) . . ?
I3 Cu1 I4 113.40(3) . . ?
S1 Cu1 I1 104.57(4) . . ?
I3 Cu1 I1 106.70(2) . . ?
I4 Cu1 I1 113.62(2) . . ?
S1 Cu1 Cu3 148.36(5) . . ?
I3 Cu1 Cu3 60.32(2) . . ?
I4 Cu1 Cu3 58.53(2) . . ?
I1 Cu1 Cu3 106.82(3) . . ?
S1 Cu1 Cu4 144.57(5) . . ?
I3 Cu1 Cu4 108.37(3) . . ?
I4 Cu1 Cu4 58.72(2) . . ?
I1 Cu1 Cu4 59.54(2) . . ?
Cu3 Cu1 Cu4 60.10(2) . . ?
S1 Cu1 Cu2 143.80(5) . . ?
I3 Cu1 Cu2 57.701(19) . . ?
I4 Cu1 Cu2 104.84(3) . . ?
I1 Cu1 Cu2 58.091(19) . . ?
Cu3 Cu1 Cu2 57.00(2) . . ?
Cu4 Cu1 Cu2 58.31(2) . . ?
S3 Cu2 I2 106.06(4) 4_565 . ?
S3 Cu2 I3 106.42(4) 4_565 . ?
I2 Cu2 I3 118.53(3) . . ?
S3 Cu2 Cu3 143.72(4) 4_565 . ?
I2 Cu2 Cu3 61.77(2) . . ?
I3 Cu2 Cu3 61.05(2) . . ?
S3 Cu2 I1 107.74(4) 4_565 . ?
I2 Cu2 I1 111.27(2) . . ?
I3 Cu2 I1 106.30(2) . . ?
Cu3 Cu2 I1 108.49(3) . . ?
S3 Cu2 Cu4 144.79(4) 4_565 . ?
I2 Cu2 Cu4 58.14(2) . . ?
I3 Cu2 Cu4 108.71(3) . . ?
Cu3 Cu2 Cu4 61.10(2) . . ?
I1 Cu2 Cu4 59.69(2) . . ?
S3 Cu2 Cu1 146.19(4) 4_565 . ?
I2 Cu2 Cu1 107.72(3) . . ?
I3 Cu2 Cu1 57.460(19) . . ?
Cu3 Cu2 Cu1 59.19(2) . . ?
I1 Cu2 Cu1 57.862(19) . . ?
Cu4 Cu2 Cu1 58.94(2) . . ?
C5 S2 C7 100.6(3) . . ?
C5 S2 Cu3 106.4(2) . . ?
C7 S2 Cu3 101.73(19) . . ?
C1 S1 C3 100.9(3) . . ?
C1 S1 Cu1 109.0(2) . . ?
C3 S1 Cu1 106.9(2) . . ?
C9 S3 C11 101.5(3) . . ?
C9 S3 Cu2 110.69(19) . 4_665 ?
C11 S3 Cu2 106.84(19) . 4_665 ?
C9 S3 Cu4 100.68(18) . . ?
C11 S3 Cu4 107.27(18) . . ?
Cu2 S3 Cu4 127.06(6) 4_665 . ?
C8 C7 S2 114.7(5) . . ?
C8 C7 H7A 108.6 . . ?
S2 C7 H7A 108.6 . . ?
C8 C7 H7B 108.6 . . ?
S2 C7 H7B 108.6 . . ?
H7A C7 H7B 107.6 . . ?
C7 C8 H8A 109.5 . . ?
C7 C8 H8B 109.5 . . ?
H8A C8 H8B 109.5 . . ?
C7 C8 H8C 109.5 . . ?
H8A C8 H8C 109.5 . . ?
H8B C8 H8C 109.5 . . ?
C6 C5 S2 110.1(4) . . ?
C6 C5 H5A 109.6 . . ?
S2 C5 H5A 109.6 . . ?
C6 C5 H5B 109.6 . . ?
S2 C5 H5B 109.6 . . ?
H5A C5 H5B 108.1 . . ?
C5 C6 H6A 109.5 . . ?
C5 C6 H6B 109.5 . . ?
H6A C6 H6B 109.5 . . ?
C5 C6 H6C 109.5 . . ?
H6A C6 H6C 109.5 . . ?
H6B C6 H6C 109.5 . . ?
C4 C3 S1 115.3(4) . . ?
C4 C3 H3A 108.4 . . ?
S1 C3 H3A 108.4 . . ?
C4 C3 H3B 108.4 . . ?
S1 C3 H3B 108.4 . . ?
H3A C3 H3B 107.5 . . ?
C3 C4 H4A 109.5 . . ?
C3 C4 H4B 109.5 . . ?
H4A C4 H4B 109.5 . . ?
C3 C4 H4C 109.5 . . ?
H4A C4 H4C 109.5 . . ?
H4B C4 H4C 109.5 . . ?
C2 C1 S1 109.9(4) . . ?
C2 C1 H1A 109.7 . . ?
S1 C1 H1A 109.7 . . ?
C2 C1 H1B 109.7 . . ?
S1 C1 H1B 109.7 . . ?
H1A C1 H1B 108.2 . . ?
C1 C2 H2A 109.5 . . ?
C1 C2 H2B 109.5 . . ?
H2A C2 H2B 109.5 . . ?
C1 C2 H2C 109.5 . . ?
H2A C2 H2C 109.5 . . ?
H2B C2 H2C 109.5 . . ?
C10 C9 S3 114.5(4) . . ?
C10 C9 H9A 108.6 . . ?
S3 C9 H9A 108.6 . . ?
C10 C9 H9B 108.6 . . ?
S3 C9 H9B 108.6 . . ?
H9A C9 H9B 107.6 . . ?
C9 C10 H10A 109.5 . . ?
C9 C10 H10B 109.5 . . ?
H10A C10 H10B 109.5 . . ?
C9 C10 H10C 109.5 . . ?
H10A C10 H10C 109.5 . . ?
H10B C10 H10C 109.5 . . ?
C12 C11 S3 108.8(4) . . ?
C12 C11 H11A 109.9 . . ?
S3 C11 H11A 109.9 . . ?
C12 C11 H11B 109.9 . . ?
S3 C11 H11B 109.9 . . ?
H11A C11 H11B 108.3 . . ?
C11 C12 H12A 109.5 . . ?
C11 C12 H12B 109.5 . . ?
H12A C12 H12B 109.5 . . ?
C11 C12 H12C 109.5 . . ?
H12A C12 H12C 109.5 . . ?
H12B C12 H12C 109.5 . . ?
 
_diffrn_measured_fraction_theta_max    0.985
_diffrn_reflns_theta_full              27.48
_diffrn_measured_fraction_theta_full   0.985
_refine_diff_density_max    1.096
_refine_diff_density_min   -0.963
_refine_diff_density_rms    0.167
#===END
 
data_cui235k
 
_audit_creation_method            SHELXL-97
_chemical_name_systematic
;
 ?
;
_chemical_name_common             ?
_chemical_melting_point           ?
_chemical_formula_moiety          'C12 H30 Cu4 I4 S3'
_chemical_formula_sum
 'C12 H30 Cu4 I4 S3'
_chemical_formula_weight          1032.37
 
loop_
 _atom_type_symbol
 _atom_type_description
 _atom_type_scat_dispersion_real
 _atom_type_scat_dispersion_imag
 _atom_type_scat_source
 'C'  'C'   0.0030   0.0020
 'International Tables Vol C Tables 4.2.6.8 and 6.1.1.4'
 'H'  'H'   0.0000   0.0000
 'International Tables Vol C Tables 4.2.6.8 and 6.1.1.4'
 'S'  'S'   0.1250   0.1230
 'International Tables Vol C Tables 4.2.6.8 and 6.1.1.4'
 'I'  'I'  -0.4740   1.8120
 'International Tables Vol C Tables 4.2.6.8 and 6.1.1.4'
 'Cu'  'Cu'   0.3200   1.2650
 'International Tables Vol C Tables 4.2.6.8 and 6.1.1.4'
 
_symmetry_cell_setting            monoclinic
_symmetry_space_group_name_H-M    'P 21/a'
_symmetry_space_group_name_hall   '-P 2yab'
 
loop_
 _symmetry_equiv_pos_as_xyz
 'x, y, z'
 '-x+1/2, y+1/2, -z'
 '-x, -y, -z'
 'x-1/2, -y-1/2, z'
 
_cell_length_a                    13.1469(4)
_cell_length_b                    11.4443(3)
_cell_length_c                    18.3143(6)
_cell_angle_alpha                 90.00
_cell_angle_beta                  103.4200(10)
_cell_angle_gamma                 90.00
_cell_volume                      2680.28(14)
_cell_formula_units_Z             4
_cell_measurement_temperature     235(2)
_cell_measurement_reflns_used     5829
_cell_measurement_theta_min       0.998
_cell_measurement_theta_max       27.485
 
_exptl_crystal_description        prism
_exptl_crystal_colour             colourless
_exptl_crystal_size_max           0.20
_exptl_crystal_size_mid           0.20
_exptl_crystal_size_min           0.12
_exptl_crystal_density_meas       ?
_exptl_crystal_density_diffrn     2.558
_exptl_crystal_density_method     'not measured'
_exptl_crystal_F_000              1912
_exptl_absorpt_coefficient_mu     7.968
_exptl_absorpt_correction_type  multi-scan
_exptl_absorpt_process_details
;
[c.f. r.h. blessing, acta cryst. (1995), a51, 33-38]
;
_exptl_absorpt_correction_T_min   0.1284
_exptl_absorpt_correction_T_max   0.2456
 
_exptl_special_details
;
 ?
;
 
_diffrn_ambient_temperature       235(2)
_diffrn_radiation_wavelength      0.71073
_diffrn_radiation_type            MoK\a
_diffrn_radiation_source          'fine-focus sealed tube'
_diffrn_radiation_monochromator   graphite
_diffrn_measurement_device_type   'Nonius Kappa APEX-II'
_diffrn_measurement_method        CCD
_diffrn_detector_area_resol_mean  ?
_diffrn_standards_number          ?
_diffrn_standards_interval_count  ?
_diffrn_standards_interval_time   ?
_diffrn_standards_decay_%         ?
_diffrn_reflns_number             11485
_diffrn_reflns_av_R_equivalents   0.0284
_diffrn_reflns_av_sigmaI/netI     0.0342
_diffrn_reflns_limit_h_min        -17
_diffrn_reflns_limit_h_max        17
_diffrn_reflns_limit_k_min        -14
_diffrn_reflns_limit_k_max        14
_diffrn_reflns_limit_l_min        -23
_diffrn_reflns_limit_l_max        23
_diffrn_reflns_theta_min          2.39
_diffrn_reflns_theta_max          27.50
_reflns_number_total              6059
_reflns_number_gt                 5245
_reflns_threshold_expression      >2sigma(I)
 
_computing_data_collection        'Collect (Bruker AXS BV, 1997-2004)'
_computing_cell_refinement        'HKL Scalepack (Otwinowski & Minor 1997)'
_computing_data_reduction         
'HKL Denzo and Scalepack (Otwinowski & Minor 1997)'
_computing_structure_solution     'SIR92 (Altomare et al., 1993)'
_computing_structure_refinement   'SHELXL-97 (Sheldrick, 1997)'
_computing_molecular_graphics     'ORTEP3 (Farrugia,1997)'
_computing_publication_material   
'WinGX publication routines (Farrugia, 1999)'
 
_refine_special_details
;
 Refinement of F^2^ against ALL reflections.  The weighted R-factor wR and
 goodness of fit S are based on F^2^, conventional R-factors R are based
 on F, with F set to zero for negative F^2^. The threshold expression of
 F^2^ > 2sigma(F^2^) is used only for calculating R-factors(gt) etc. and is
 not relevant to the choice of reflections for refinement.  R-factors based
 on F^2^ are statistically about twice as large as those based on F, and R-
 factors based on ALL data will be even larger.
;
 
_refine_ls_structure_factor_coef  Fsqd
_refine_ls_matrix_type            full
_refine_ls_weighting_scheme       calc
_refine_ls_weighting_details
 'calc w=1/[\s^2^(Fo^2^)+(0.0210P)^2^+14.2362P] where P=(Fo^2^+2Fc^2^)/3'
_atom_sites_solution_primary      direct
_atom_sites_solution_secondary    difmap
_atom_sites_solution_hydrogens    geom
_refine_ls_hydrogen_treatment     noref
_refine_ls_extinction_method      none
_refine_ls_extinction_coef        ?
_refine_ls_number_reflns          6059
_refine_ls_number_parameters      214
_refine_ls_number_restraints      0
_refine_ls_R_factor_all           0.0473
_refine_ls_R_factor_gt            0.0376
_refine_ls_wR_factor_ref          0.0836
_refine_ls_wR_factor_gt           0.0786
_refine_ls_goodness_of_fit_ref    1.131
_refine_ls_restrained_S_all       1.131
_refine_ls_shift/su_max           0.001
_refine_ls_shift/su_mean          0.000
 
loop_
 _atom_site_label
 _atom_site_type_symbol
 _atom_site_fract_x
 _atom_site_fract_y
 _atom_site_fract_z
 _atom_site_U_iso_or_equiv
 _atom_site_adp_type
 _atom_site_occupancy
 _atom_site_symmetry_multiplicity
 _atom_site_calc_flag
 _atom_site_refinement_flags
 _atom_site_disorder_assembly
 _atom_site_disorder_group
I1 I 0.63641(3) 0.07947(4) 0.58847(2) 0.03380(10) Uani 1 1 d . . .
I2 I 0.68444(3) 0.34432(3) 0.76958(2) 0.03455(10) Uani 1 1 d . . .
I3 I 0.88315(3) 0.01449(4) 0.78492(3) 0.03821(11) Uani 1 1 d . . .
I4 I 0.55194(3) 0.00712(4) 0.80847(2) 0.03842(11) Uani 1 1 d . . .
Cu1 Cu 0.68536(7) -0.03831(7) 0.72038(5) 0.0437(2) Uani 1 1 d . . .
Cu2 Cu 0.77632(6) 0.18526(7) 0.70094(5) 0.03649(18) Uani 1 1 d . . .
Cu3 Cu 0.72881(6) 0.12848(8) 0.83259(5) 0.04050(19) Uani 1 1 d . . .
Cu4 Cu 0.56826(6) 0.16821(7) 0.70660(4) 0.03543(18) Uani 1 1 d . . .
S1 S 0.67753(17) -0.23226(16) 0.68487(12) 0.0548(5) Uani 1 1 d . . .
S2 S 0.80699(15) 0.18039(17) 0.95387(10) 0.0484(4) Uani 1 1 d . . .
S3 S 0.39497(11) 0.21320(14) 0.64776(9) 0.0324(3) Uani 1 1 d . . .
C1 C 0.5555(8) -0.2954(9) 0.6900(6) 0.079(3) Uani 1 1 d . . .
H1A H 0.5607 -0.3799 0.6893 0.094 Uiso 1 1 calc R . .
H1B H 0.5381 -0.2726 0.7366 0.094 Uiso 1 1 calc R . .
C2 C 0.4707(8) -0.2551(11) 0.6246(6) 0.091(3) Uani 1 1 d . . .
H2A H 0.4713 -0.1714 0.6218 0.136 Uiso 1 1 calc R . .
H2B H 0.4040 -0.2810 0.6313 0.136 Uiso 1 1 calc R . .
H2C H 0.4828 -0.2874 0.5789 0.136 Uiso 1 1 calc R . .
C3 C 0.7690(8) -0.3134(8) 0.7603(7) 0.084(3) Uani 1 1 d . . .
H3A H 0.7651 -0.3958 0.7474 0.101 Uiso 1 1 calc R . .
H3B H 0.8396 -0.2874 0.7618 0.101 Uiso 1 1 calc R . .
C4 C 0.7493(10) -0.3001(10) 0.8347(7) 0.103(4) Uani 1 1 d . . .
H4A H 0.7579 -0.2196 0.8496 0.155 Uiso 1 1 calc R . .
H4B H 0.7979 -0.3473 0.8698 0.155 Uiso 1 1 calc R . .
H4C H 0.6793 -0.3246 0.8339 0.155 Uiso 1 1 calc R . .
C5 C 0.8698(7) 0.0518(9) 0.9999(5) 0.072(3) Uani 1 1 d . . .
H5A H 0.9147 0.0181 0.9703 0.087 Uiso 1 1 calc R . .
H5B H 0.9129 0.0728 1.0487 0.087 Uiso 1 1 calc R . .
C6 C 0.7900(9) -0.0357(9) 1.0095(6) 0.089(3) Uani 1 1 d . . .
H6A H 0.7473 -0.0032 1.0405 0.134 Uiso 1 1 calc R . .
H6B H 0.8244 -0.1047 1.0330 0.134 Uiso 1 1 calc R . .
H6C H 0.7468 -0.0556 0.9613 0.134 Uiso 1 1 calc R . .
C7 C 0.9230(7) 0.2602(9) 0.9401(5) 0.074(3) Uani 1 1 d . . .
H7A H 0.9630 0.2090 0.9152 0.089 Uiso 1 1 calc R . .
H7B H 0.8999 0.3262 0.9072 0.089 Uiso 1 1 calc R . .
C8 C 0.9927(9) 0.3037(11) 1.0110(7) 0.104(4) Uani 1 1 d . . .
H8A H 0.9533 0.3523 1.0371 0.155 Uiso 1 1 calc R . .
H8B H 1.0488 0.3482 0.9994 0.155 Uiso 1 1 calc R . .
H8C H 1.0210 0.2385 1.0422 0.155 Uiso 1 1 calc R . .
C9 C 0.3957(6) 0.2835(8) 0.5592(4) 0.060(2) Uani 1 1 d . . .
H9A H 0.4346 0.2362 0.5311 0.072 Uiso 1 1 calc R . .
H9B H 0.3246 0.2915 0.5295 0.072 Uiso 1 1 calc R . .
C10 C 0.4454(6) 0.4020(10) 0.5741(6) 0.082(3) Uani 1 1 d . . .
H10A H 0.4028 0.4509 0.5975 0.123 Uiso 1 1 calc R . .
H10B H 0.4515 0.4366 0.5276 0.123 Uiso 1 1 calc R . .
H10C H 0.5136 0.3942 0.6068 0.123 Uiso 1 1 calc R . .
C11 C 0.3432(5) 0.0692(7) 0.6175(4) 0.0488(18) Uani 1 1 d . . .
H11A H 0.3899 0.0316 0.5908 0.059 Uiso 1 1 calc R . .
H11B H 0.3430 0.0225 0.6617 0.059 Uiso 1 1 calc R . .
C12 C 0.2343(6) 0.0692(9) 0.5678(5) 0.076(3) Uani 1 1 d . . .
H12A H 0.1885 0.1126 0.5916 0.115 Uiso 1 1 calc R . .
H12B H 0.2096 -0.0098 0.5596 0.115 Uiso 1 1 calc R . .
H12C H 0.2354 0.1047 0.5205 0.115 Uiso 1 1 calc R . .
 
loop_
 _atom_site_aniso_label
 _atom_site_aniso_U_11
 _atom_site_aniso_U_22
 _atom_site_aniso_U_33
 _atom_site_aniso_U_23
 _atom_site_aniso_U_13
 _atom_site_aniso_U_12
I1 0.02738(18) 0.0461(2) 0.0292(2) -0.00444(17) 0.00911(15) -0.00154(16)
I2 0.0371(2) 0.02859(19) 0.0381(2) -0.00203(16) 0.00893(17) 0.00196(15)
I3 0.0295(2) 0.0398(2) 0.0456(2) 0.00098(18) 0.00910(17) 0.00641(16)
I4 0.0347(2) 0.0456(2) 0.0374(2) 0.00801(18) 0.01338(17) -0.00366(17)
Cu1 0.0443(5) 0.0368(4) 0.0508(5) 0.0000(4) 0.0127(4) -0.0010(4)
Cu2 0.0321(4) 0.0424(4) 0.0384(4) 0.0015(3) 0.0149(3) -0.0011(3)
Cu3 0.0390(4) 0.0475(5) 0.0339(4) 0.0015(4) 0.0063(3) -0.0013(4)
Cu4 0.0271(4) 0.0417(4) 0.0365(4) 0.0032(3) 0.0053(3) 0.0007(3)
S1 0.0665(12) 0.0384(9) 0.0643(13) -0.0058(9) 0.0245(10) -0.0104(9)
S2 0.0491(10) 0.0569(11) 0.0366(9) -0.0038(8) 0.0048(8) 0.0061(8)
S3 0.0231(6) 0.0437(8) 0.0307(8) -0.0005(6) 0.0070(6) 0.0038(6)
C1 0.084(7) 0.064(6) 0.097(8) -0.008(5) 0.040(6) -0.028(5)
C2 0.070(6) 0.120(9) 0.083(8) 0.017(7) 0.020(6) 0.010(6)
C3 0.078(7) 0.043(5) 0.131(10) 0.010(6) 0.026(7) 0.008(4)
C4 0.140(11) 0.076(7) 0.081(8) 0.023(6) -0.001(8) -0.003(7)
C5 0.074(6) 0.090(7) 0.052(5) 0.025(5) 0.014(4) 0.027(5)
C6 0.116(9) 0.079(7) 0.065(6) 0.031(5) 0.005(6) -0.007(6)
C7 0.064(5) 0.093(7) 0.061(6) -0.012(5) 0.004(4) -0.021(5)
C8 0.088(8) 0.120(10) 0.095(9) -0.040(8) 0.006(7) -0.031(7)
C9 0.041(4) 0.109(7) 0.032(4) 0.029(4) 0.015(3) 0.033(4)
C10 0.043(4) 0.125(9) 0.080(7) 0.064(6) 0.016(4) 0.000(5)
C11 0.034(3) 0.056(4) 0.055(5) -0.024(4) 0.009(3) -0.001(3)
C12 0.037(4) 0.111(8) 0.077(6) -0.054(6) 0.004(4) -0.004(4)
 
_geom_special_details
;
 All esds (except the esd in the dihedral angle between two l.s. planes)
 are estimated using the full covariance matrix.  The cell esds are taken
 into account individually in the estimation of esds in distances, angles
 and torsion angles; correlations between esds in cell parameters are only
 used when they are defined by crystal symmetry.  An approximate (isotropic)
 treatment of cell esds is used for estimating esds involving l.s. planes.
;
 
loop_
 _geom_bond_atom_site_label_1
 _geom_bond_atom_site_label_2
 _geom_bond_distance
 _geom_bond_site_symmetry_2
 _geom_bond_publ_flag
I1 Cu2 2.7080(9) . ?
I1 Cu1 2.7103(10) . ?
I1 Cu4 2.7229(9) . ?
I2 Cu4 2.6282(9) . ?
I2 Cu2 2.6566(9) . ?
I2 Cu3 2.7315(9) . ?
I3 Cu1 2.6640(9) . ?
I3 Cu2 2.6748(9) . ?
I3 Cu3 2.7209(10) . ?
I4 Cu3 2.6560(9) . ?
I4 Cu4 2.6668(9) . ?
I4 Cu1 2.6951(10) . ?
Cu1 S1 2.308(2) . ?
Cu1 Cu3 2.7655(12) . ?
Cu1 Cu4 2.8000(12) . ?
Cu1 Cu2 2.8812(12) . ?
Cu2 S3 2.3317(17) 4_665 ?
Cu2 Cu3 2.7064(12) . ?
Cu2 Cu4 2.7681(11) . ?
Cu3 S2 2.299(2) . ?
Cu3 Cu4 2.7795(11) . ?
Cu4 S3 2.3404(15) . ?
S1 C1 1.782(9) . ?
S1 C3 1.856(10) . ?
S2 C5 1.799(9) . ?
S2 C7 1.844(9) . ?
S3 C9 1.813(7) . ?
S3 C11 1.820(7) . ?
S3 Cu2 2.3317(17) 4_565 ?
C1 C2 1.507(13) . ?
C1 H1A 0.9700 . ?
C1 H1B 0.9700 . ?
C2 H2A 0.9600 . ?
C2 H2B 0.9600 . ?
C2 H2C 0.9600 . ?
C3 C4 1.453(15) . ?
C3 H3A 0.9700 . ?
C3 H3B 0.9700 . ?
C4 H4A 0.9600 . ?
C4 H4B 0.9600 . ?
C4 H4C 0.9600 . ?
C5 C6 1.490(14) . ?
C5 H5A 0.9700 . ?
C5 H5B 0.9700 . ?
C6 H6A 0.9600 . ?
C6 H6B 0.9600 . ?
C6 H6C 0.9600 . ?
C7 C8 1.490(12) . ?
C7 H7A 0.9700 . ?
C7 H7B 0.9700 . ?
C8 H8A 0.9600 . ?
C8 H8B 0.9600 . ?
C8 H8C 0.9600 . ?
C9 C10 1.503(13) . ?
C9 H9A 0.9700 . ?
C9 H9B 0.9700 . ?
C10 H10A 0.9600 . ?
C10 H10B 0.9600 . ?
C10 H10C 0.9600 . ?
C11 C12 1.508(9) . ?
C11 H11A 0.9700 . ?
C11 H11B 0.9700 . ?
C12 H12A 0.9600 . ?
C12 H12B 0.9600 . ?
C12 H12C 0.9600 . ?
 
loop_
 _geom_angle_atom_site_label_1
 _geom_angle_atom_site_label_2
 _geom_angle_atom_site_label_3
 _geom_angle
 _geom_angle_site_symmetry_1
 _geom_angle_site_symmetry_3
 _geom_angle_publ_flag
Cu2 I1 Cu1 64.25(3) . . ?
Cu2 I1 Cu4 61.29(2) . . ?
Cu1 I1 Cu4 62.04(3) . . ?
Cu4 I2 Cu2 63.17(3) . . ?
Cu4 I2 Cu3 62.44(2) . . ?
Cu2 I2 Cu3 60.29(3) . . ?
Cu1 I3 Cu2 65.32(3) . . ?
Cu1 I3 Cu3 61.79(3) . . ?
Cu2 I3 Cu3 60.20(3) . . ?
Cu3 I4 Cu4 62.96(3) . . ?
Cu3 I4 Cu1 62.23(3) . . ?
Cu4 I4 Cu1 62.96(3) . . ?
S1 Cu1 I3 108.56(6) . . ?
S1 Cu1 I4 111.19(6) . . ?
I3 Cu1 I4 113.24(3) . . ?
S1 Cu1 I1 103.96(6) . . ?
I3 Cu1 I1 106.74(3) . . ?
I4 Cu1 I1 112.63(3) . . ?
S1 Cu1 Cu3 149.43(7) . . ?
I3 Cu1 Cu3 60.12(3) . . ?
I4 Cu1 Cu3 58.19(3) . . ?
I1 Cu1 Cu3 106.53(3) . . ?
S1 Cu1 Cu4 143.00(7) . . ?
I3 Cu1 Cu4 107.95(3) . . ?
I4 Cu1 Cu4 58.03(3) . . ?
I1 Cu1 Cu4 59.20(3) . . ?
Cu3 Cu1 Cu4 59.92(3) . . ?
S1 Cu1 Cu2 144.26(7) . . ?
I3 Cu1 Cu2 57.52(2) . . ?
I4 Cu1 Cu2 104.43(3) . . ?
I1 Cu1 Cu2 57.84(3) . . ?
Cu3 Cu1 Cu2 57.23(3) . . ?
Cu4 Cu1 Cu2 58.30(3) . . ?
S3 Cu2 I2 106.13(5) 4_665 . ?
S3 Cu2 I3 106.94(5) 4_665 . ?
I2 Cu2 I3 117.66(3) . . ?
S3 Cu2 Cu3 143.79(5) 4_665 . ?
I2 Cu2 Cu3 61.23(3) . . ?
I3 Cu2 Cu3 60.74(3) . . ?
S3 Cu2 I1 107.89(5) 4_665 . ?
I2 Cu2 I1 111.29(3) . . ?
I3 Cu2 I1 106.50(3) . . ?
Cu3 Cu2 I1 108.29(3) . . ?
S3 Cu2 Cu4 144.43(5) 4_665 . ?
I2 Cu2 Cu4 57.91(2) . . ?
I3 Cu2 Cu4 108.57(3) . . ?
Cu3 Cu2 Cu4 61.01(3) . . ?
I1 Cu2 Cu4 59.62(2) . . ?
S3 Cu2 Cu1 146.23(5) 4_665 . ?
I2 Cu2 Cu1 107.62(3) . . ?
I3 Cu2 Cu1 57.16(3) . . ?
Cu3 Cu2 Cu1 59.23(3) . . ?
I1 Cu2 Cu1 57.92(3) . . ?
Cu4 Cu2 Cu1 59.38(3) . . ?
S2 Cu3 I4 118.28(6) . . ?
S2 Cu3 Cu2 130.91(7) . . ?
I4 Cu3 Cu2 110.58(3) . . ?
S2 Cu3 I3 103.56(6) . . ?
I4 Cu3 I3 112.66(3) . . ?
Cu2 Cu3 I3 59.06(3) . . ?
S2 Cu3 I2 100.27(6) . . ?
I4 Cu3 I2 108.04(3) . . ?
Cu2 Cu3 I2 58.49(3) . . ?
I3 Cu3 I2 113.58(3) . . ?
S2 Cu3 Cu1 149.93(6) . . ?
I4 Cu3 Cu1 59.58(3) . . ?
Cu2 Cu3 Cu1 63.53(3) . . ?
I3 Cu3 Cu1 58.09(3) . . ?
I2 Cu3 Cu1 108.86(3) . . ?
S2 Cu3 Cu4 147.47(6) . . ?
I4 Cu3 Cu4 58.71(2) . . ?
Cu2 Cu3 Cu4 60.59(3) . . ?
I3 Cu3 Cu4 106.93(3) . . ?
I2 Cu3 Cu4 56.96(2) . . ?
Cu1 Cu3 Cu4 60.66(3) . . ?
S3 Cu4 I2 115.97(5) . . ?
S3 Cu4 I4 104.26(5) . . ?
I2 Cu4 I4 110.86(3) . . ?
S3 Cu4 I1 100.42(5) . . ?
I2 Cu4 I1 111.71(3) . . ?
I4 Cu4 I1 113.13(3) . . ?
S3 Cu4 Cu2 146.31(6) . . ?
I2 Cu4 Cu2 58.92(2) . . ?
I4 Cu4 Cu2 108.40(3) . . ?
I1 Cu4 Cu2 59.09(2) . . ?
S3 Cu4 Cu3 152.72(6) . . ?
I2 Cu4 Cu3 60.60(3) . . ?
I4 Cu4 Cu3 58.33(3) . . ?
I1 Cu4 Cu3 105.79(3) . . ?
Cu2 Cu4 Cu3 58.40(3) . . ?
S3 Cu4 Cu1 133.11(5) . . ?
I2 Cu4 Cu1 110.88(3) . . ?
I4 Cu4 Cu1 59.02(3) . . ?
I1 Cu4 Cu1 58.76(3) . . ?
Cu2 Cu4 Cu1 62.32(3) . . ?
Cu3 Cu4 Cu1 59.43(3) . . ?
C1 S1 C3 101.2(5) . . ?
C1 S1 Cu1 110.9(4) . . ?
C3 S1 Cu1 107.0(3) . . ?
C5 S2 C7 99.5(5) . . ?
C5 S2 Cu3 107.2(3) . . ?
C7 S2 Cu3 101.2(3) . . ?
C9 S3 C11 102.1(4) . . ?
C9 S3 Cu2 107.2(3) . 4_565 ?
C11 S3 Cu2 109.8(2) . 4_565 ?
C9 S3 Cu4 107.6(2) . . ?
C11 S3 Cu4 101.3(2) . . ?
Cu2 S3 Cu4 126.26(7) 4_565 . ?
C2 C1 S1 110.1(7) . . ?
C2 C1 H1A 109.6 . . ?
S1 C1 H1A 109.6 . . ?
C2 C1 H1B 109.6 . . ?
S1 C1 H1B 109.6 . . ?
H1A C1 H1B 108.2 . . ?
C1 C2 H2A 109.5 . . ?
C1 C2 H2B 109.5 . . ?
H2A C2 H2B 109.5 . . ?
C1 C2 H2C 109.5 . . ?
H2A C2 H2C 109.5 . . ?
H2B C2 H2C 109.5 . . ?
C4 C3 S1 114.8(8) . . ?
C4 C3 H3A 108.6 . . ?
S1 C3 H3A 108.6 . . ?
C4 C3 H3B 108.6 . . ?
S1 C3 H3B 108.6 . . ?
H3A C3 H3B 107.5 . . ?
C3 C4 H4A 109.5 . . ?
C3 C4 H4B 109.5 . . ?
H4A C4 H4B 109.5 . . ?
C3 C4 H4C 109.5 . . ?
H4A C4 H4C 109.5 . . ?
H4B C4 H4C 109.5 . . ?
C6 C5 S2 110.2(7) . . ?
C6 C5 H5A 109.6 . . ?
S2 C5 H5A 109.6 . . ?
C6 C5 H5B 109.6 . . ?
S2 C5 H5B 109.6 . . ?
H5A C5 H5B 108.1 . . ?
C5 C6 H6A 109.5 . . ?
C5 C6 H6B 109.5 . . ?
H6A C6 H6B 109.5 . . ?
C5 C6 H6C 109.5 . . ?
H6A C6 H6C 109.5 . . ?
H6B C6 H6C 109.5 . . ?
C8 C7 S2 114.1(8) . . ?
C8 C7 H7A 108.7 . . ?
S2 C7 H7A 108.7 . . ?
C8 C7 H7B 108.7 . . ?
S2 C7 H7B 108.7 . . ?
H7A C7 H7B 107.6 . . ?
C7 C8 H8A 109.5 . . ?
C7 C8 H8B 109.5 . . ?
H8A C8 H8B 109.5 . . ?
C7 C8 H8C 109.5 . . ?
H8A C8 H8C 109.5 . . ?
H8B C8 H8C 109.5 . . ?
C10 C9 S3 109.3(6) . . ?
C10 C9 H9A 109.8 . . ?
S3 C9 H9A 109.8 . . ?
C10 C9 H9B 109.8 . . ?
S3 C9 H9B 109.8 . . ?
H9A C9 H9B 108.3 . . ?
C9 C10 H10A 109.5 . . ?
C9 C10 H10B 109.5 . . ?
H10A C10 H10B 109.5 . . ?
C9 C10 H10C 109.5 . . ?
H10A C10 H10C 109.5 . . ?
H10B C10 H10C 109.5 . . ?
C12 C11 S3 114.8(6) . . ?
C12 C11 H11A 108.6 . . ?
S3 C11 H11A 108.6 . . ?
C12 C11 H11B 108.6 . . ?
S3 C11 H11B 108.6 . . ?
H11A C11 H11B 107.5 . . ?
C11 C12 H12A 109.5 . . ?
C11 C12 H12B 109.5 . . ?
H12A C12 H12B 109.5 . . ?
C11 C12 H12C 109.5 . . ?
H12A C12 H12C 109.5 . . ?
H12B C12 H12C 109.5 . . ?
 
_diffrn_measured_fraction_theta_max    0.984
_diffrn_reflns_theta_full              27.50
_diffrn_measured_fraction_theta_full   0.984
_refine_diff_density_max    0.728
_refine_diff_density_min   -0.916
_refine_diff_density_rms    0.150
#===END
 
data_cui275k
 
_audit_creation_method            SHELXL-97
_chemical_name_systematic
;
 ?
;
_chemical_name_common             ?
_chemical_melting_point           ?
_chemical_formula_moiety          'C12 H30 Cu4 I4 S3'
_chemical_formula_sum
 'C12 H30 Cu4 I4 S3'
_chemical_formula_weight          1032.37
 
loop_
 _atom_type_symbol
 _atom_type_description
 _atom_type_scat_dispersion_real
 _atom_type_scat_dispersion_imag
 _atom_type_scat_source
 'C'  'C'   0.0030   0.0020
 'International Tables Vol C Tables 4.2.6.8 and 6.1.1.4'
 'H'  'H'   0.0000   0.0000
 'International Tables Vol C Tables 4.2.6.8 and 6.1.1.4'
 'S'  'S'   0.1250   0.1230
 'International Tables Vol C Tables 4.2.6.8 and 6.1.1.4'
 'I'  'I'  -0.4740   1.8120
 'International Tables Vol C Tables 4.2.6.8 and 6.1.1.4'
 'Cu'  'Cu'   0.3200   1.2650
 'International Tables Vol C Tables 4.2.6.8 and 6.1.1.4'
 
_symmetry_cell_setting            monoclinic
_symmetry_space_group_name_H-M    'P 21/a'
_symmetry_space_group_name_hall   '-P 2yab'
 
loop_
 _symmetry_equiv_pos_as_xyz
 'x, y, z'
 '-x+1/2, y+1/2, -z'
 '-x, -y, -z'
 'x-1/2, -y-1/2, z'
 
_cell_length_a                    13.1590(4)
_cell_length_b                    11.5203(3)
_cell_length_c                    18.3708(6)
_cell_angle_alpha                 90.00
_cell_angle_beta                  103.8540(10)
_cell_angle_gamma                 90.00
_cell_volume                      2703.92(14)
_cell_formula_units_Z             4
_cell_measurement_temperature     275(2)
_cell_measurement_reflns_used     5957
_cell_measurement_theta_min       0.998
_cell_measurement_theta_max       27.485
 
_exptl_crystal_description        prism
_exptl_crystal_colour             colourless
_exptl_crystal_size_max           0.20
_exptl_crystal_size_mid           0.20
_exptl_crystal_size_min           0.12
_exptl_crystal_density_meas       ?
_exptl_crystal_density_diffrn     2.536
_exptl_crystal_density_method     'not measured'
_exptl_crystal_F_000              1912
_exptl_absorpt_coefficient_mu     7.899
_exptl_absorpt_correction_type    multi-scan
_exptl_absorpt_process_details
;
[c.f. r.h. blessing, acta cryst. (1995), a51, 33-38]
;
_exptl_absorpt_correction_T_min   0.1319
_exptl_absorpt_correction_T_max   0.2461
 
_exptl_special_details
;
 ?
;
 
_diffrn_ambient_temperature       275(2)
_diffrn_radiation_wavelength      0.71073
_diffrn_radiation_type            MoK\a
_diffrn_radiation_source          'fine-focus sealed tube'
_diffrn_radiation_monochromator   graphite
_diffrn_measurement_device_type   'Nonius Kappa APEX-II'
_diffrn_measurement_method        CCD
_diffrn_detector_area_resol_mean  ?
_diffrn_standards_number          ?
_diffrn_standards_interval_count  ?
_diffrn_standards_interval_time   ?
_diffrn_standards_decay_%         ?
_diffrn_reflns_number             21619
_diffrn_reflns_av_R_equivalents   0.0528
_diffrn_reflns_av_sigmaI/netI     0.0375
_diffrn_reflns_limit_h_min        -17
_diffrn_reflns_limit_h_max        17
_diffrn_reflns_limit_k_min        -14
_diffrn_reflns_limit_k_max        14
_diffrn_reflns_limit_l_min        -23
_diffrn_reflns_limit_l_max        23
_diffrn_reflns_theta_min          2.38
_diffrn_reflns_theta_max          27.48
_reflns_number_total              6168
_reflns_number_gt                 5071
_reflns_threshold_expression      >2sigma(I)
 
_computing_data_collection        'Collect (Bruker AXS BV, 1997-2004)'
_computing_cell_refinement        'HKL Scalepack (Otwinowski & Minor 1997)'
_computing_data_reduction         
'HKL Denzo and Scalepack (Otwinowski & Minor 1997)'
_computing_structure_solution     'SIR92 (Altomare et al., 1993)'
_computing_structure_refinement   'SHELXL-97 (Sheldrick, 1997)'
_computing_molecular_graphics     'ORTEP3 (Farrugia,1997)'
_computing_publication_material   
'WinGX publication routines (Farrugia, 1999)'
 
_refine_special_details
;
 Refinement of F^2^ against ALL reflections.  The weighted R-factor wR and
 goodness of fit S are based on F^2^, conventional R-factors R are based
 on F, with F set to zero for negative F^2^. The threshold expression of
 F^2^ > 2sigma(F^2^) is used only for calculating R-factors(gt) etc. and is
 not relevant to the choice of reflections for refinement.  R-factors based
 on F^2^ are statistically about twice as large as those based on F, and R-
 factors based on ALL data will be even larger.
;
 
_refine_ls_structure_factor_coef  Fsqd
_refine_ls_matrix_type            full
_refine_ls_weighting_scheme       calc
_refine_ls_weighting_details
 'calc w=1/[\s^2^(Fo^2^)+(0.0256P)^2^+14.0754P] where P=(Fo^2^+2Fc^2^)/3'
_atom_sites_solution_primary      direct
_atom_sites_solution_secondary    difmap
_atom_sites_solution_hydrogens    geom
_refine_ls_hydrogen_treatment     noref
_refine_ls_extinction_method      none
_refine_ls_extinction_coef        ?
_refine_ls_number_reflns          6168
_refine_ls_number_parameters      214
_refine_ls_number_restraints      0
_refine_ls_R_factor_all           0.0597
_refine_ls_R_factor_gt            0.0456
_refine_ls_wR_factor_ref          0.1007
_refine_ls_wR_factor_gt           0.0938
_refine_ls_goodness_of_fit_ref    1.140
_refine_ls_restrained_S_all       1.140
_refine_ls_shift/su_max           0.000
_refine_ls_shift/su_mean          0.000
 
loop_
 _atom_site_label
 _atom_site_type_symbol
 _atom_site_fract_x
 _atom_site_fract_y
 _atom_site_fract_z
 _atom_site_U_iso_or_equiv
 _atom_site_adp_type
 _atom_site_occupancy
 _atom_site_symmetry_multiplicity
 _atom_site_calc_flag
 _atom_site_refinement_flags
 _atom_site_disorder_assembly
 _atom_site_disorder_group
I1 I 0.13705(4) 0.07963(5) 0.08924(3) 0.04628(13) Uani 1 1 d . . .
I2 I 0.18707(4) 0.34432(4) 0.26882(3) 0.04666(13) Uani 1 1 d . . .
I3 I 0.38521(4) 0.01747(5) 0.28616(3) 0.05196(14) Uani 1 1 d . . .
I4 I 0.05467(4) 0.01016(5) 0.30871(3) 0.05302(14) Uani 1 1 d . . .
Cu1 Cu 0.18766(8) -0.03647(9) 0.22137(7) 0.0596(3) Uani 1 1 d . . .
Cu2 Cu 0.27834(7) 0.18610(9) 0.20097(6) 0.0488(2) Uani 1 1 d . . .
Cu3 Cu 0.23149(8) 0.13122(9) 0.33305(6) 0.0557(3) Uani 1 1 d . . .
Cu4 Cu 0.06943(7) 0.16938(8) 0.20654(6) 0.0488(2) Uani 1 1 d . . .
S1 S 0.1767(2) -0.2287(2) 0.18561(17) 0.0796(7) Uani 1 1 d . . .
S2 S 0.30639(19) 0.1817(2) 0.45437(13) 0.0668(6) Uani 1 1 d . . .
S3 S -0.10377(13) 0.21406(17) 0.14757(10) 0.0443(4) Uani 1 1 d . . .
C1 C 0.0547(14) -0.2916(14) 0.1898(11) 0.152(7) Uani 1 1 d . . .
H1A H 0.0606 -0.3755 0.1907 0.182 Uiso 1 1 calc R . .
H1B H 0.0358 -0.2669 0.2353 0.182 Uiso 1 1 calc R . .
C2 C -0.0263(11) -0.2554(18) 0.1244(9) 0.156(8) Uani 1 1 d . . .
H2A H -0.0216 -0.1732 0.1174 0.234 Uiso 1 1 calc R . .
H2B H -0.0939 -0.2742 0.1322 0.234 Uiso 1 1 calc R . .
H2C H -0.0164 -0.2952 0.0807 0.234 Uiso 1 1 calc R . .
C3 C 0.2700(13) -0.3120(12) 0.2636(12) 0.142(7) Uani 1 1 d . . .
H3A H 0.2663 -0.3939 0.2510 0.170 Uiso 1 1 calc R . .
H3B H 0.3410 -0.2862 0.2663 0.170 Uiso 1 1 calc R . .
C4 C 0.2495(17) -0.2987(14) 0.3318(10) 0.163(8) Uani 1 1 d . . .
H4A H 0.2691 -0.2219 0.3502 0.244 Uiso 1 1 calc R . .
H4B H 0.2888 -0.3548 0.3659 0.244 Uiso 1 1 calc R . .
H4C H 0.1761 -0.3100 0.3278 0.244 Uiso 1 1 calc R . .
C5 C 0.3709(11) 0.0564(12) 0.5026(7) 0.106(4) Uani 1 1 d . . .
H5A H 0.4191 0.0247 0.4752 0.128 Uiso 1 1 calc R . .
H5B H 0.4107 0.0785 0.5522 0.128 Uiso 1 1 calc R . .
C6 C 0.2934(13) -0.0309(13) 0.5088(8) 0.131(6) Uani 1 1 d . . .
H6A H 0.2399 0.0041 0.5291 0.197 Uiso 1 1 calc R . .
H6B H 0.3267 -0.0921 0.5414 0.197 Uiso 1 1 calc R . .
H6C H 0.2626 -0.0622 0.4601 0.197 Uiso 1 1 calc R . .
C7 C 0.4243(9) 0.2648(13) 0.4434(7) 0.105(4) Uani 1 1 d . . .
H7A H 0.4653 0.2149 0.4189 0.126 Uiso 1 1 calc R . .
H7B H 0.4007 0.3302 0.4105 0.126 Uiso 1 1 calc R . .
C8 C 0.4908(11) 0.3073(16) 0.5112(9) 0.151(7) Uani 1 1 d . . .
H8A H 0.4544 0.3655 0.5325 0.226 Uiso 1 1 calc R . .
H8B H 0.5527 0.3405 0.5006 0.226 Uiso 1 1 calc R . .
H8C H 0.5102 0.2445 0.5461 0.226 Uiso 1 1 calc R . .
C9 C -0.1034(7) 0.2837(11) 0.0586(5) 0.081(3) Uani 1 1 d . . .
H9A H -0.0629 0.2380 0.0313 0.097 Uiso 1 1 calc R . .
H9B H -0.1744 0.2904 0.0281 0.097 Uiso 1 1 calc R . .
C10 C -0.0556(8) 0.4021(12) 0.0754(7) 0.103(5) Uani 1 1 d . . .
H10A H -0.0966 0.4469 0.1019 0.154 Uiso 1 1 calc R . .
H10B H -0.0541 0.4405 0.0293 0.154 Uiso 1 1 calc R . .
H10C H 0.0145 0.3945 0.1056 0.154 Uiso 1 1 calc R . .
C11 C -0.1554(6) 0.0695(8) 0.1173(6) 0.068(3) Uani 1 1 d . . .
H11A H -0.1089 0.0323 0.0907 0.081 Uiso 1 1 calc R . .
H11B H -0.1554 0.0231 0.1614 0.081 Uiso 1 1 calc R . .
C12 C -0.2645(7) 0.0705(12) 0.0674(7) 0.104(5) Uani 1 1 d . . .
H12A H -0.3113 0.1069 0.0933 0.157 Uiso 1 1 calc R . .
H12B H -0.2870 -0.0078 0.0548 0.157 Uiso 1 1 calc R . .
H12C H -0.2647 0.1130 0.0224 0.157 Uiso 1 1 calc R . .
 
loop_
 _atom_site_aniso_label
 _atom_site_aniso_U_11
 _atom_site_aniso_U_22
 _atom_site_aniso_U_33
 _atom_site_aniso_U_23
 _atom_site_aniso_U_13
 _atom_site_aniso_U_12
I1 0.0369(2) 0.0603(3) 0.0420(3) -0.0069(2) 0.01021(19) -0.0021(2)
I2 0.0477(3) 0.0379(2) 0.0533(3) -0.0022(2) 0.0100(2) 0.00255(19)
I3 0.0403(3) 0.0522(3) 0.0623(3) 0.0032(2) 0.0102(2) 0.0090(2)
I4 0.0474(3) 0.0603(3) 0.0534(3) 0.0112(2) 0.0161(2) -0.0046(2)
Cu1 0.0584(6) 0.0491(6) 0.0710(7) 0.0007(5) 0.0150(5) -0.0008(5)
Cu2 0.0425(5) 0.0545(5) 0.0522(6) 0.0028(4) 0.0166(4) -0.0008(4)
Cu3 0.0521(6) 0.0619(6) 0.0505(6) 0.0025(5) 0.0073(4) -0.0004(5)
Cu4 0.0371(4) 0.0545(5) 0.0522(6) 0.0040(4) 0.0058(4) 0.0001(4)
S1 0.0933(19) 0.0525(13) 0.096(2) -0.0108(13) 0.0280(16) -0.0144(13)
S2 0.0649(14) 0.0767(15) 0.0539(13) -0.0038(11) 0.0044(11) 0.0109(12)
S3 0.0319(8) 0.0589(11) 0.0413(10) -0.0016(8) 0.0070(7) 0.0053(8)
C1 0.182(17) 0.108(11) 0.197(19) -0.041(12) 0.106(15) -0.071(12)
C2 0.099(11) 0.25(2) 0.110(12) 0.064(14) 0.005(9) 0.028(13)
C3 0.144(14) 0.062(8) 0.23(2) 0.007(11) 0.062(15) -0.002(8)
C4 0.27(3) 0.094(11) 0.146(16) 0.030(11) 0.090(17) 0.007(13)
C5 0.108(10) 0.134(12) 0.066(7) 0.022(8) 0.001(7) 0.037(9)
C6 0.162(15) 0.106(11) 0.117(12) 0.033(9) 0.017(11) -0.013(11)
C7 0.078(7) 0.141(12) 0.086(8) -0.026(8) 0.000(6) -0.024(8)
C8 0.099(10) 0.191(18) 0.140(14) -0.071(13) -0.016(9) -0.024(11)
C9 0.053(5) 0.150(11) 0.043(5) 0.023(6) 0.019(4) 0.037(6)
C10 0.048(5) 0.157(12) 0.101(9) 0.083(9) 0.015(5) 0.001(7)
C11 0.045(4) 0.077(6) 0.077(6) -0.030(5) 0.009(4) 0.001(4)
C12 0.049(5) 0.152(12) 0.107(9) -0.077(9) 0.008(6) -0.007(6)
 
_geom_special_details
;
 All esds (except the esd in the dihedral angle between two l.s. planes)
 are estimated using the full covariance matrix.  The cell esds are taken
 into account individually in the estimation of esds in distances, angles
 and torsion angles; correlations between esds in cell parameters are only
 used when they are defined by crystal symmetry.  An approximate (isotropic)
 treatment of cell esds is used for estimating esds involving l.s. planes.
;
 
loop_
 _geom_bond_atom_site_label_1
 _geom_bond_atom_site_label_2
 _geom_bond_distance
 _geom_bond_site_symmetry_2
 _geom_bond_publ_flag
I1 Cu2 2.7105(11) . ?
I1 Cu1 2.7111(13) . ?
I1 Cu4 2.7245(11) . ?
I2 Cu4 2.6304(11) . ?
I2 Cu2 2.6525(11) . ?
I2 Cu3 2.7259(12) . ?
I3 Cu1 2.6606(12) . ?
I3 Cu2 2.6734(11) . ?
I3 Cu3 2.7175(12) . ?
I4 Cu3 2.6572(12) . ?
I4 Cu4 2.6645(11) . ?
I4 Cu1 2.6963(13) . ?
Cu1 S1 2.305(3) . ?
Cu1 Cu3 2.7762(16) . ?
Cu1 Cu4 2.8135(14) . ?
Cu1 Cu2 2.8902(14) . ?
Cu2 S3 2.328(2) 4_665 ?
Cu2 Cu3 2.7172(14) . ?
Cu2 Cu4 2.7819(13) . ?
Cu3 S2 2.286(3) . ?
Cu3 Cu4 2.7872(14) . ?
Cu4 S3 2.3346(18) . ?
S1 C1 1.780(14) . ?
S1 C3 1.908(17) . ?
S2 C5 1.796(12) . ?
S2 C7 1.874(12) . ?
S3 C9 1.823(9) . ?
S3 C11 1.834(9) . ?
S3 Cu2 2.328(2) 4_565 ?
C1 C2 1.46(2) . ?
C1 H1A 0.9700 . ?
C1 H1B 0.9700 . ?
C2 H2A 0.9600 . ?
C2 H2B 0.9600 . ?
C2 H2C 0.9600 . ?
C3 C4 1.35(2) . ?
C3 H3A 0.9700 . ?
C3 H3B 0.9700 . ?
C4 H4A 0.9600 . ?
C4 H4B 0.9600 . ?
C4 H4C 0.9600 . ?
C5 C6 1.456(18) . ?
C5 H5A 0.9700 . ?
C5 H5B 0.9700 . ?
C6 H6A 0.9600 . ?
C6 H6B 0.9600 . ?
C6 H6C 0.9600 . ?
C7 C8 1.426(15) . ?
C7 H7A 0.9700 . ?
C7 H7B 0.9700 . ?
C8 H8A 0.9600 . ?
C8 H8B 0.9600 . ?
C8 H8C 0.9600 . ?
C9 C10 1.503(16) . ?
C9 H9A 0.9700 . ?
C9 H9B 0.9700 . ?
C10 H10A 0.9600 . ?
C10 H10B 0.9600 . ?
C10 H10C 0.9600 . ?
C11 C12 1.506(12) . ?
C11 H11A 0.9700 . ?
C11 H11B 0.9700 . ?
C12 H12A 0.9600 . ?
C12 H12B 0.9600 . ?
C12 H12C 0.9600 . ?
 
loop_
 _geom_angle_atom_site_label_1
 _geom_angle_atom_site_label_2
 _geom_angle_atom_site_label_3
 _geom_angle
 _geom_angle_site_symmetry_1
 _geom_angle_site_symmetry_3
 _geom_angle_publ_flag
Cu2 I1 Cu1 64.43(3) . . ?
Cu2 I1 Cu4 61.58(3) . . ?
Cu1 I1 Cu4 62.34(3) . . ?
Cu4 I2 Cu2 63.55(3) . . ?
Cu4 I2 Cu3 62.68(3) . . ?
Cu2 I2 Cu3 60.67(3) . . ?
Cu1 I3 Cu2 65.62(3) . . ?
Cu1 I3 Cu3 62.14(3) . . ?
Cu2 I3 Cu3 60.53(3) . . ?
Cu3 I4 Cu4 63.17(3) . . ?
Cu3 I4 Cu1 62.47(4) . . ?
Cu4 I4 Cu1 63.31(3) . . ?
S1 Cu1 I3 109.86(9) . . ?
S1 Cu1 I4 110.85(9) . . ?
I3 Cu1 I4 113.02(4) . . ?
S1 Cu1 I1 103.51(9) . . ?
I3 Cu1 I1 106.83(4) . . ?
I4 Cu1 I1 112.28(4) . . ?
S1 Cu1 Cu3 150.12(9) . . ?
I3 Cu1 Cu3 59.93(3) . . ?
I4 Cu1 Cu3 58.08(3) . . ?
I1 Cu1 Cu3 106.34(4) . . ?
S1 Cu1 Cu4 141.90(9) . . ?
I3 Cu1 Cu4 107.75(4) . . ?
I4 Cu1 Cu4 57.79(3) . . ?
I1 Cu1 Cu4 59.06(3) . . ?
Cu3 Cu1 Cu4 59.82(4) . . ?
S1 Cu1 Cu2 144.60(9) . . ?
I3 Cu1 Cu2 57.40(3) . . ?
I4 Cu1 Cu2 104.32(4) . . ?
I1 Cu1 Cu2 57.77(3) . . ?
Cu3 Cu1 Cu2 57.27(4) . . ?
Cu4 Cu1 Cu2 58.37(3) . . ?
S3 Cu2 I2 106.31(6) 4_665 . ?
S3 Cu2 I3 107.18(6) 4_665 . ?
I2 Cu2 I3 117.27(4) . . ?
S3 Cu2 I1 108.06(6) 4_665 . ?
I2 Cu2 I1 111.17(4) . . ?
I3 Cu2 I1 106.49(4) . . ?
S3 Cu2 Cu3 143.87(6) 4_665 . ?
I2 Cu2 Cu3 61.00(3) . . ?
I3 Cu2 Cu3 60.54(3) . . ?
I1 Cu2 Cu3 108.05(4) . . ?
S3 Cu2 Cu4 144.46(6) 4_665 . ?
I2 Cu2 Cu4 57.84(3) . . ?
I3 Cu2 Cu4 108.31(4) . . ?
I1 Cu2 Cu4 59.46(3) . . ?
Cu3 Cu2 Cu4 60.89(4) . . ?
S3 Cu2 Cu1 146.14(7) 4_665 . ?
I2 Cu2 Cu1 107.53(4) . . ?
I3 Cu2 Cu1 56.98(3) . . ?
I1 Cu2 Cu1 57.80(3) . . ?
Cu3 Cu2 Cu1 59.26(4) . . ?
Cu4 Cu2 Cu1 59.44(3) . . ?
S2 Cu3 I4 116.96(8) . . ?
S2 Cu3 Cu2 132.41(8) . . ?
I4 Cu3 Cu2 110.40(4) . . ?
S2 Cu3 I3 104.58(7) . . ?
I4 Cu3 I3 112.45(4) . . ?
Cu2 Cu3 I3 58.93(3) . . ?
S2 Cu3 I2 100.99(8) . . ?
I4 Cu3 I2 108.15(4) . . ?
Cu2 Cu3 I2 58.33(3) . . ?
I3 Cu3 I2 113.32(4) . . ?
S2 Cu3 Cu1 149.58(8) . . ?
I4 Cu3 Cu1 59.46(3) . . ?
Cu2 Cu3 Cu1 63.48(4) . . ?
I3 Cu3 Cu1 57.92(3) . . ?
I2 Cu3 Cu1 108.77(4) . . ?
S2 Cu3 Cu4 146.94(8) . . ?
I4 Cu3 Cu4 58.54(3) . . ?
Cu2 Cu3 Cu4 60.70(4) . . ?
I3 Cu3 Cu4 106.90(4) . . ?
I2 Cu3 Cu4 56.98(3) . . ?
Cu1 Cu3 Cu4 60.76(4) . . ?
S3 Cu4 I2 116.13(6) . . ?
S3 Cu4 I4 104.53(6) . . ?
I2 Cu4 I4 110.83(4) . . ?
S3 Cu4 I1 100.61(6) . . ?
I2 Cu4 I1 111.42(4) . . ?
I4 Cu4 I1 112.87(4) . . ?
S3 Cu4 Cu2 146.22(7) . . ?
I2 Cu4 Cu2 58.61(3) . . ?
I4 Cu4 Cu2 108.24(4) . . ?
I1 Cu4 Cu2 58.96(3) . . ?
S3 Cu4 Cu3 152.71(7) . . ?
I2 Cu4 Cu3 60.33(3) . . ?
I4 Cu4 Cu3 58.29(3) . . ?
I1 Cu4 Cu3 105.67(4) . . ?
Cu2 Cu4 Cu3 58.41(3) . . ?
S3 Cu4 Cu1 133.35(7) . . ?
I2 Cu4 Cu1 110.46(4) . . ?
I4 Cu4 Cu1 58.90(3) . . ?
I1 Cu4 Cu1 58.60(3) . . ?
Cu2 Cu4 Cu1 62.20(4) . . ?
Cu3 Cu4 Cu1 59.43(4) . . ?
C1 S1 C3 100.8(8) . . ?
C1 S1 Cu1 112.0(6) . . ?
C3 S1 Cu1 106.5(5) . . ?
C5 S2 C7 99.1(7) . . ?
C5 S2 Cu3 108.6(5) . . ?
C7 S2 Cu3 101.5(4) . . ?
C9 S3 C11 102.0(5) . . ?
C9 S3 Cu2 107.8(3) . 4_565 ?
C11 S3 Cu2 109.9(3) . 4_565 ?
C9 S3 Cu4 107.5(3) . . ?
C11 S3 Cu4 101.0(3) . . ?
Cu2 S3 Cu4 126.04(9) 4_565 . ?
C2 C1 S1 109.6(12) . . ?
C2 C1 H1A 109.7 . . ?
S1 C1 H1A 109.7 . . ?
C2 C1 H1B 109.7 . . ?
S1 C1 H1B 109.7 . . ?
H1A C1 H1B 108.2 . . ?
C1 C2 H2A 109.5 . . ?
C1 C2 H2B 109.5 . . ?
H2A C2 H2B 109.5 . . ?
C1 C2 H2C 109.5 . . ?
H2A C2 H2C 109.5 . . ?
H2B C2 H2C 109.5 . . ?
C4 C3 S1 113.8(14) . . ?
C4 C3 H3A 108.8 . . ?
S1 C3 H3A 108.8 . . ?
C4 C3 H3B 108.8 . . ?
S1 C3 H3B 108.8 . . ?
H3A C3 H3B 107.7 . . ?
C3 C4 H4A 109.5 . . ?
C3 C4 H4B 109.5 . . ?
H4A C4 H4B 109.5 . . ?
C3 C4 H4C 109.5 . . ?
H4A C4 H4C 109.5 . . ?
H4B C4 H4C 109.5 . . ?
C6 C5 S2 109.7(10) . . ?
C6 C5 H5A 109.7 . . ?
S2 C5 H5A 109.7 . . ?
C6 C5 H5B 109.7 . . ?
S2 C5 H5B 109.7 . . ?
H5A C5 H5B 108.2 . . ?
C5 C6 H6A 109.5 . . ?
C5 C6 H6B 109.5 . . ?
H6A C6 H6B 109.5 . . ?
C5 C6 H6C 109.5 . . ?
H6A C6 H6C 109.5 . . ?
H6B C6 H6C 109.5 . . ?
C8 C7 S2 115.7(11) . . ?
C8 C7 H7A 108.4 . . ?
S2 C7 H7A 108.4 . . ?
C8 C7 H7B 108.4 . . ?
S2 C7 H7B 108.4 . . ?
H7A C7 H7B 107.4 . . ?
C7 C8 H8A 109.5 . . ?
C7 C8 H8B 109.5 . . ?
H8A C8 H8B 109.5 . . ?
C7 C8 H8C 109.5 . . ?
H8A C8 H8C 109.5 . . ?
H8B C8 H8C 109.5 . . ?
C10 C9 S3 107.8(7) . . ?
C10 C9 H9A 110.1 . . ?
S3 C9 H9A 110.1 . . ?
C10 C9 H9B 110.1 . . ?
S3 C9 H9B 110.1 . . ?
H9A C9 H9B 108.5 . . ?
C9 C10 H10A 109.5 . . ?
C9 C10 H10B 109.5 . . ?
H10A C10 H10B 109.5 . . ?
C9 C10 H10C 109.5 . . ?
H10A C10 H10C 109.5 . . ?
H10B C10 H10C 109.5 . . ?
C12 C11 S3 114.0(8) . . ?
C12 C11 H11A 108.7 . . ?
S3 C11 H11A 108.7 . . ?
C12 C11 H11B 108.7 . . ?
S3 C11 H11B 108.7 . . ?
H11A C11 H11B 107.6 . . ?
C11 C12 H12A 109.5 . . ?
C11 C12 H12B 109.5 . . ?
H12A C12 H12B 109.5 . . ?
C11 C12 H12C 109.5 . . ?
H12A C12 H12C 109.5 . . ?
H12B C12 H12C 109.5 . . ?
 
_diffrn_measured_fraction_theta_max    0.995
_diffrn_reflns_theta_full              27.48
_diffrn_measured_fraction_theta_full   0.995
_refine_diff_density_max    1.002
_refine_diff_density_min   -0.897
_refine_diff_density_rms    0.150
#===END
#-------------------------------------------------------------------------
#1    Global data block identification for start of deposition

data_global

#
#-------------------------------------------------------------------------
#2    Person making the deposition
#
_publ_contact_author_name      'Carsten Strohmann'
_publ_contact_author_address
;
Anorganische Chemie
Technische Universitaet Dortmund
Otto-Hahn-Strasse 6
44227 Dortmund
Germany
;
_publ_contact_author_email       mail@carsten-strohmann.de
_publ_contact_author_phone         '0049 231 755 7063'

#-------------------------------------------------------------------------
#3    Publication details
#
#     Provide these details if the structure has been published,
#     accepted or submitted for publication
#
#     The CCDC journal deposition number, eg. 182/357,
#     should be included only if it has been assigned by the journal
#
loop_
_publ_author_name
;
'M. Knorr, F. Pam, A. Khatyr, C. Strohmann, M.M. 
Kubicki, Y. Rousselin, S.M. Aly, D. Fortinc, P.D. 
Harvey'
;
_journal_name_full                 'Inorganic Chemistry'
_journal_volume                    ?
_journal_page_first                ?
_journal_page_last                 ?
_journal_year                      ?
_ccdc_journal_depnumber            ?
#
#-------------------------------------------------------------------------
#4    Chemical and physical data
#
#     Note that the units for melting point are Kelvin
#     The compound_id is the identifier for the compound in the published
#       paper, eg. 4a, II, etc.
#     Provide a brief description of any significant biological activity,
#       eg. antimalarial activity
#     If the compound exhibits polymorphism provide brief details,
#       eg. monoclinic form, low-temperature phase, etc.
#     For chemdiag  leave blank - no longer necessary

_ccdc_compound_id                  ?
_ccdc_biological_activity          ?
_ccdc_polymorph                    ?

_ccdc_chemdiag_type                ?
_ccdc_chemdiag_records
;
?
;
#
#-------------------------------------------------------------------------
#5    Other data relating to the structure determination and refinement
#
#     Record the radiation type if not X-rays, eg. neutron
#     Record the temperature of the data collection (Kelvin)
#       if not room-temperature
#     Record R_squared if this is the only reliability factor given by
#       your refinement program
#     Describe briefly any disorder, eg. t-Butyl C31-33 disordered over
#       two sites with occupancies 0.6 and 0.4
#     Under ccdc_comments record any other important information

_ccdc_temp_data_collection          ?
_ccdc_ls_R_squared                  ?
_ccdc_disorder                      ?
_ccdc_comments
;
?
;
#-------------------------------------------------------------------------
#6    Include your "standard" CIF file here
#     It should contain the following data items:
#       unit cell parameters and volume, z value, space group symbol,
#       R-factor(s), atomic coordinates with standard deviations,
#       occupancy factors, bond lengths and bond angles
#     Other data items may be present but will not necessarily be
#       included in the Cambridge Structural Database
#
#     Do NOT include structure factors
#
#
#-------------------------------------------------------------------------
#SUBMISSION INFORMATION
#
#     For a journal send the form to the address specified by the journal
#
#     For a private communication to the CCDC send the form to the address
#       deposit@ccdc.cam.ac.uk
#
#     For up-to-date information on deposition procedures, check the website
#       http://www.ccdc.cam.ac.uk/

data_mg260608

_audit_creation_date                    2009-07-23T22:50:01-00:00
_audit_creation_method                  'WinGX routine CIF_UPDATE'

#----------------------------------------------------------------------------#
#                   CHEMICAL INFORMATION                                     #
#----------------------------------------------------------------------------#

_chemical_name_systematic
;
  ?
;
_chemical_formula_sum                   'C12 H30 Br3 Cu3 S3'
_chemical_formula_weight                700.89

#----------------------------------------------------------------------------#
#                   UNIT CELL INFORMATION                                    #
#----------------------------------------------------------------------------#

_symmetry_cell_setting                  orthorhombic
_symmetry_space_group_name_H-M          Pbcn
loop_
     _symmetry_equiv_pos_as_xyz
'x, y, z'
'-x+1/2, -y+1/2, z+1/2'
'-x, y, -z+1/2'
'x+1/2, -y+1/2, -z'
'-x, -y, -z'
'x-1/2, y-1/2, -z-1/2'
'x, -y, z-1/2'
'-x-1/2, y-1/2, z'

_cell_length_a                          14.7789(17)
_cell_length_b                          12.9264(15)
_cell_length_c                          23.410(3)
_cell_angle_alpha                       90
_cell_angle_beta                        90
_cell_angle_gamma                       90
_cell_volume                            4472.2(9)
_cell_formula_units_Z                   8
_cell_measurement_temperature           173(2)

#----------------------------------------------------------------------------#
#                   CRYSTAL INFORMATION                                      #
#----------------------------------------------------------------------------#

_exptl_crystal_size_max                 0.4
_exptl_crystal_size_mid                 0.2
_exptl_crystal_size_min                 0.2
_exptl_crystal_density_diffrn           2.082
_exptl_crystal_density_method           'not measured'
_exptl_crystal_F_000                    2736
_exptl_special_details
;
  ?
;

#----------------------------------------------------------------------------#
#                   ABSORPTION CORRECTION                                    #
#----------------------------------------------------------------------------#

_exptl_absorpt_coefficient_mu           8.46
_exptl_absorpt_correction_type          empirical
_exptl_absorpt_correction_T_min	    	0.283
_exptl_absorpt_correction_T_max	    	0.338
_exptl_absorpt_process_details 'Sadabs 2.01 (Bruker AXS, 1999)'

#----------------------------------------------------------------------------#
#                   DATA COLLECTION                                          #
#----------------------------------------------------------------------------#

_diffrn_ambient_temperature             173(2)
_diffrn_radiation_wavelength            0.71073
_diffrn_radiation_type                  MoK\a
_diffrn_radiation_monochromator         graphite
_diffrn_measurement_device_type         'Bruker APEX-CCD'
_diffrn_measurement_method              omega-scans
_diffrn_reflns_av_R_equivalents         0.0647
_diffrn_reflns_av_unetI/netI            0.0238
_diffrn_reflns_number                   93410
_diffrn_reflns_limit_h_min              -18
_diffrn_reflns_limit_h_max              18
_diffrn_reflns_limit_k_min              -16
_diffrn_reflns_limit_k_max              16
_diffrn_reflns_limit_l_min              -29
_diffrn_reflns_limit_l_max              29
_diffrn_reflns_theta_min                1.74
_diffrn_reflns_theta_max                27
_diffrn_reflns_theta_full               27
_diffrn_measured_fraction_theta_full
                                         1
_diffrn_measured_fraction_theta_max
                                         1
_reflns_number_total                    4877
_reflns_number_gt                       4363
_reflns_threshold_expression            >2sigma(I)

#----------------------------------------------------------------------------#
#                   COMPUTER PROGRAMS USED                                   #
#----------------------------------------------------------------------------#

_computing_data_collection              'SMART 5.622 (Bruker AXS, 2001)'
_computing_cell_refinement              'SAINTPLUS 6.02 (Bruker AXS, 1999)'
_computing_data_reduction               'SAINTPLUS 6.02 (Bruker AXS, 1999)'
_computing_structure_solution           'SHELXS-90 (Sheldrick, 1990)'
_computing_structure_refinement         'SHELXL-97 (Sheldrick, 1997)'
_computing_molecular_graphics           'Ortep-3 V1.073 (Farrugia, 2001)'
_computing_publication_material         'SHELXL-97 (Sheldrick, 1997)'

#----------------------------------------------------------------------------#
#                   REFINEMENT INFORMATION                                   #
#----------------------------------------------------------------------------#

_refine_special_details
;
  Refinement of F^2^ against ALL reflections.  The weighted R-factor wR and
  goodness of fit S are based on F^2^, conventional R-factors R are based
  on F, with F set to zero for negative F^2^. The threshold expression of
  F^2^ > 2sigma(F^2^) is used only for calculating R-factors(gt) etc. and is
  not relevant to the choice of reflections for refinement.  R-factors based
  on F^2^ are statistically about twice as large as those based on F, and R-
  factors based on ALL data will be even larger.
;
_refine_ls_structure_factor_coef        Fsqd
_refine_ls_matrix_type                  full
_refine_ls_weighting_scheme             calc
_refine_ls_weighting_details
;
'calc w=1/[\s^2^(Fo^2^)+(0.0350P)^2^+5.0593P] where 
P=(Fo^2^+2Fc^2^)/3'
;
_atom_sites_solution_primary            direct
_atom_sites_solution_secondary          difmap
_atom_sites_solution_hydrogens          geom
_refine_ls_hydrogen_treatment           riding
_refine_ls_extinction_method            none
_refine_ls_number_reflns                4877
_refine_ls_number_parameters            196
_refine_ls_number_restraints            0
_refine_ls_R_factor_all                 0.0302
_refine_ls_R_factor_gt                  0.0241
_refine_ls_wR_factor_ref                0.0652
_refine_ls_wR_factor_gt                 0.0611
_refine_ls_goodness_of_fit_ref          1.037
_refine_ls_restrained_S_all             1.037
_refine_ls_shift/su_max                 0.003
_refine_ls_shift/su_mean                0
_refine_diff_density_max                0.485
_refine_diff_density_min                -0.744
_refine_diff_density_rms                0.119

#----------------------------------------------------------------------------#
#                   ATOMIC TYPES, COORDINATES AND THERMAL PARAMETERS         #
#----------------------------------------------------------------------------#

loop_
     _atom_type_symbol
     _atom_type_description
     _atom_type_scat_dispersion_real
     _atom_type_scat_dispersion_imag
     _atom_type_scat_source
C C 0.0033 0.0016 'International Tables Vol C Tables 4.2.6.8 and 6.1.1.4'
H H 0 0 'International Tables Vol C Tables 4.2.6.8 and 6.1.1.4'
S S 0.1246 0.1234 'International Tables Vol C Tables 4.2.6.8 and 6.1.1.4'
Cu Cu 0.3201 1.2651 'International Tables Vol C Tables 4.2.6.8 and 6.1.1.4'
Br Br -0.2901 2.4595 'International Tables Vol C Tables 4.2.6.8 and 6.1.1.4'

loop_
     _atom_site_label
     _atom_site_type_symbol
     _atom_site_fract_x
     _atom_site_fract_y
     _atom_site_fract_z
     _atom_site_U_iso_or_equiv
     _atom_site_adp_type
     _atom_site_occupancy
     _atom_site_symmetry_multiplicity
     _atom_site_calc_flag
     _atom_site_refinement_flags
     _atom_site_disorder_assembly
     _atom_site_disorder_group
Br1 Br -0.09042(2) 0.41369(2) 0.036762(12) 0.02409(8) Uani 1 1 d . . .
Br2 Br 0.117428(19) 0.68539(2) 0.289943(12) 0.02360(7) Uani 1 1 d . . .
Br3 Br -0.08610(2) 0.87994(2) 0.352365(15) 0.03318(9) Uani 1 1 d . . .
C1 C -0.2130(2) 0.7086(3) 0.05261(14) 0.0300(7) Uani 1 1 d . . .
H1A H -0.232 0.6664 0.0858 0.036 Uiso 1 1 calc R . .
H1B H -0.2445 0.776 0.0553 0.036 Uiso 1 1 calc R . .
C2 C -0.2436(2) 0.6546(3) -0.00167(17) 0.0447(9) Uani 1 1 d . . .
H2A H -0.2292 0.698 -0.0348 0.067 Uiso 1 1 calc R . .
H2B H -0.309 0.6428 -0.0001 0.067 Uiso 1 1 calc R . .
H2C H -0.2123 0.588 -0.0052 0.067 Uiso 1 1 calc R . .
C3 C -0.0669(2) 0.8111(2) -0.00409(13) 0.0303(7) Uani 1 1 d . . .
H3A H -0.0005 0.82 -0.0069 0.036 Uiso 1 1 calc R . .
H3B H -0.0874 0.775 -0.039 0.036 Uiso 1 1 calc R . .
C4 C -0.1109(3) 0.9171(2) -0.00199(14) 0.0365(8) Uani 1 1 d . . .
H4A H -0.1766 0.9092 0.0014 0.055 Uiso 1 1 calc R . .
H4B H -0.0966 0.9552 -0.0371 0.055 Uiso 1 1 calc R . .
H4C H -0.0879 0.9554 0.0311 0.055 Uiso 1 1 calc R . .
C5 C 0.0775(2) 0.4707(2) 0.17349(14) 0.0301(7) Uani 1 1 d . . .
H5A H 0.1126 0.4827 0.2089 0.036 Uiso 1 1 calc R . .
H5B H 0.0139 0.4576 0.1847 0.036 Uiso 1 1 calc R . .
C6 C 0.1140(3) 0.3755(3) 0.14437(18) 0.0495(10) Uani 1 1 d . . .
H6A H 0.0785 0.3614 0.1099 0.074 Uiso 1 1 calc R . .
H6B H 0.1098 0.3164 0.1704 0.074 Uiso 1 1 calc R . .
H6C H 0.1774 0.3869 0.1339 0.074 Uiso 1 1 calc R . .
C7 C 0.1976(2) 0.5986(3) 0.10707(14) 0.0322(7) Uani 1 1 d . . .
H7A H 0.2154 0.5334 0.0879 0.039 Uiso 1 1 calc R . .
H7B H 0.2014 0.6547 0.0784 0.039 Uiso 1 1 calc R . .
C8 C 0.2644(2) 0.6207(3) 0.15419(15) 0.0368(8) Uani 1 1 d . . .
H8A H 0.2443 0.6811 0.176 0.055 Uiso 1 1 calc R . .
H8B H 0.3241 0.6346 0.1376 0.055 Uiso 1 1 calc R . .
H8C H 0.2684 0.5606 0.1796 0.055 Uiso 1 1 calc R . .
C9 C 0.2489(2) 0.9276(2) 0.28973(13) 0.0275(6) Uani 1 1 d . . .
H9A H 0.2142 0.8948 0.2584 0.033 Uiso 1 1 calc R . .
H9B H 0.2799 0.9892 0.2741 0.033 Uiso 1 1 calc R . .
C10 C 0.3184(2) 0.8521(3) 0.31235(14) 0.0349(7) Uani 1 1 d . . .
H10A H 0.3544 0.8856 0.3423 0.052 Uiso 1 1 calc R . .
H10B H 0.3584 0.8303 0.2812 0.052 Uiso 1 1 calc R . .
H10C H 0.2876 0.7914 0.3283 0.052 Uiso 1 1 calc R . .
C11 C 0.1085(3) 1.0646(3) 0.30760(18) 0.0458(9) Uani 1 1 d . . .
H11A H 0.1508 1.1118 0.2877 0.055 Uiso 1 1 calc R . .
H11B H 0.0697 1.0311 0.2785 0.055 Uiso 1 1 calc R . .
C12 C 0.0498(3) 1.1262(3) 0.3491(3) 0.0730(17) Uani 1 1 d . . .
H12A H 0.006 1.0799 0.3673 0.109 Uiso 1 1 calc R . .
H12B H 0.0176 1.1806 0.3282 0.109 Uiso 1 1 calc R . .
H12C H 0.0883 1.1578 0.3784 0.109 Uiso 1 1 calc R . .
Cu1 Cu -0.00890(2) 0.57753(3) 0.048649(15) 0.02268(9) Uani 1 1 d . . .
Cu2 Cu 0.05264(3) 0.71835(3) 0.194906(16) 0.02846(9) Uani 1 1 d . . .
Cu3 Cu 0.07472(2) 0.83282(3) 0.361203(15) 0.02411(9) Uani 1 1 d . . .
S1 S -0.09211(5) 0.73087(5) 0.05733(3) 0.01918(14) Uani 1 1 d . . .
S2 S 0.08147(5) 0.58700(5) 0.13038(3) 0.01959(14) Uani 1 1 d . . .
S3 S 0.17206(5) 0.96677(5) 0.34622(3) 0.02693(16) Uani 1 1 d . . .

loop_
     _atom_site_aniso_label
     _atom_site_aniso_U_11
     _atom_site_aniso_U_22
     _atom_site_aniso_U_33
     _atom_site_aniso_U_23
     _atom_site_aniso_U_13
     _atom_site_aniso_U_12
Br1 0.03036(15) 0.02513(14) 0.01677(14) -0.00202(10) 0.00494(11) -0.00500(11)
Br2 0.02701(15) 0.02824(14) 0.01556(14) -0.00510(10) -0.00199(10) 0.00396(11)
Br3 0.02919(16) 0.02705(16) 0.0433(2) -0.00774(13) -0.00385(13) 0.00563(12)
C1 0.0264(15) 0.0333(15) 0.0304(17) -0.0016(13) -0.0038(13) 0.0014(12)
C2 0.044(2) 0.0420(19) 0.048(2) -0.0159(17) -0.0197(17) 0.0041(16)
C3 0.0467(19) 0.0256(15) 0.0185(15) 0.0054(11) 0.0064(13) 0.0041(13)
C4 0.059(2) 0.0250(15) 0.0252(17) 0.0033(12) -0.0002(15) 0.0062(14)
C5 0.0413(17) 0.0256(14) 0.0233(16) 0.0061(12) -0.0058(13) -0.0045(12)
C6 0.070(3) 0.0274(17) 0.051(2) -0.0033(16) -0.016(2) 0.0066(17)
C7 0.0279(15) 0.0438(18) 0.0249(16) -0.0033(13) 0.0038(12) -0.0045(13)
C8 0.0279(16) 0.0435(19) 0.039(2) -0.0065(15) -0.0021(14) -0.0006(14)
C9 0.0337(16) 0.0292(15) 0.0195(15) 0.0014(12) 0.0053(12) -0.0058(12)
C10 0.0305(16) 0.0428(18) 0.0315(18) 0.0036(14) 0.0014(13) 0.0002(14)
C11 0.052(2) 0.0233(15) 0.062(3) 0.0110(16) 0.0108(19) 0.0044(15)
C12 0.060(3) 0.030(2) 0.129(5) 0.003(2) 0.050(3) 0.0047(18)
Cu1 0.02898(18) 0.02299(17) 0.01608(18) -0.00217(13) -0.00029(13) 0.00095(13)
Cu2 0.0370(2) 0.02674(19) 0.0216(2) -0.00173(14) -0.00354(16) 0.00187(15)
Cu3 0.02867(19) 0.02318(17) 0.02047(19) 0.00335(13) 0.00017(14) -0.00281(13)
S1 0.0254(3) 0.0189(3) 0.0132(3) -0.0004(2) -0.0004(2) 0.0027(2)
S2 0.0259(3) 0.0191(3) 0.0138(3) 0.0001(2) -0.0028(2) -0.0010(2)
S3 0.0331(4) 0.0246(3) 0.0232(4) -0.0018(3) 0.0058(3) -0.0060(3)


#----------------------------------------------------------------------------#
#                   MOLECULAR GEOMETRY                                       #
#----------------------------------------------------------------------------#

_geom_special_details
;
  All esds (except the esd in the dihedral angle between two l.s. planes)
  are estimated using the full covariance matrix.  The cell esds are taken
  into account individually in the estimation of esds in distances, angles
  and torsion angles; correlations between esds in cell parameters are only
  used when they are defined by crystal symmetry.  An approximate (isotropic)
  treatment of cell esds is used for estimating esds involving l.s. planes.
;
loop_
     _geom_bond_atom_site_label_1
     _geom_bond_atom_site_label_2
     _geom_bond_distance
     _geom_bond_site_symmetry_2
     _geom_bond_publ_flag
Br1 Cu1 2.4523(5) . ?
Br1 Cu1 2.4830(5) 5_565 ?
Br2 Cu2 2.4593(5) . ?
Br2 Cu2 2.5738(6) 3 ?
Br2 Cu3 2.6101(5) . ?
Br3 Cu2 2.4150(5) 3 ?
Br3 Cu3 2.4623(5) . ?
C1 C2 1.519(4) . ?
C1 S1 1.813(3) . ?
C3 C4 1.517(4) . ?
C3 S1 1.812(3) . ?
C5 C6 1.507(5) . ?
C5 S2 1.811(3) . ?
C7 C8 1.508(4) . ?
C7 S2 1.807(3) . ?
C9 C10 1.513(4) . ?
C9 S3 1.816(3) . ?
C11 C12 1.526(6) . ?
C11 S3 1.816(4) . ?
Cu1 S2 2.3366(8) . ?
Cu1 S1 2.3415(7) . ?
Cu1 Br1 2.4830(5) 5_565 ?
Cu1 Cu1 3.0454(7) 5_565 ?
Cu2 S2 2.3121(8) . ?
Cu2 Br3 2.4150(5) 3 ?
Cu2 Br2 2.5738(6) 3 ?
Cu2 Cu3 2.7309(5) 3 ?
Cu2 Cu2 3.0124(8) 3 ?
Cu3 S3 2.2783(8) . ?
Cu3 S1 2.3323(8) 3 ?
Cu3 Cu2 2.7309(6) 3 ?
S1 Cu3 2.3323(8) 3 ?

loop_
     _geom_angle_atom_site_label_1
     _geom_angle_atom_site_label_2
     _geom_angle_atom_site_label_3
     _geom_angle
     _geom_angle_site_symmetry_1
     _geom_angle_site_symmetry_3
     _geom_angle_publ_flag
Cu1 Br1 Cu1 76.202(15) . 5_565 ?
Cu2 Br2 Cu2 73.488(17) . 3 ?
Cu2 Br2 Cu3 110.951(17) . . ?
Cu2 Br2 Cu3 63.574(13) 3 . ?
Cu2 Br3 Cu3 68.094(15) 3 . ?
C2 C1 S1 114.7(2) . . ?
C4 C3 S1 113.8(2) . . ?
C6 C5 S2 114.5(3) . . ?
C8 C7 S2 114.6(2) . . ?
C10 C9 S3 110.5(2) . . ?
C12 C11 S3 109.9(3) . . ?
S2 Cu1 S1 100.65(3) . . ?
S2 Cu1 Br1 114.77(2) . . ?
S1 Cu1 Br1 118.88(2) . . ?
S2 Cu1 Br1 108.61(2) . 5_565 ?
S1 Cu1 Br1 109.98(2) . 5_565 ?
Br1 Cu1 Br1 103.798(15) . 5_565 ?
S2 Cu1 Cu1 126.70(3) . 5_565 ?
S1 Cu1 Cu1 131.87(3) . 5_565 ?
Br1 Cu1 Cu1 52.353(13) . 5_565 ?
Br1 Cu1 Cu1 51.445(13) 5_565 5_565 ?
S2 Cu2 Br3 107.34(2) . 3 ?
S2 Cu2 Br2 113.08(2) . . ?
Br3 Cu2 Br2 118.990(19) 3 . ?
S2 Cu2 Br2 98.54(2) . 3 ?
Br3 Cu2 Br2 113.969(17) 3 3 ?
Br2 Cu2 Br2 103.113(17) . 3 ?
S2 Cu2 Cu3 102.16(2) . 3 ?
Br3 Cu2 Cu3 56.775(14) 3 3 ?
Br2 Cu2 Cu3 142.877(18) . 3 ?
Br2 Cu2 Cu3 58.861(14) 3 3 ?
S2 Cu2 Cu2 130.89(2) . 3 ?
Br3 Cu2 Cu2 119.877(13) 3 3 ?
Br2 Cu2 Cu2 55.001(15) . 3 ?
Br2 Cu2 Cu2 51.511(14) 3 3 ?
Cu3 Cu2 Cu2 93.203(18) 3 3 ?
S3 Cu3 S1 119.06(3) . 3 ?
S3 Cu3 Br3 114.11(3) . . ?
S1 Cu3 Br3 108.35(2) 3 . ?
S3 Cu3 Br2 107.69(2) . . ?
S1 Cu3 Br2 94.79(2) 3 . ?
Br3 Cu3 Br2 111.119(16) . . ?
S3 Cu3 Cu2 140.62(3) . 3 ?
S1 Cu3 Cu2 99.39(2) 3 3 ?
Br3 Cu3 Cu2 55.131(14) . 3 ?
Br2 Cu3 Cu2 57.565(14) . 3 ?
C3 S1 C1 104.18(16) . . ?
C3 S1 Cu3 107.62(11) . 3 ?
C1 S1 Cu3 104.37(11) . 3 ?
C3 S1 Cu1 107.94(10) . . ?
C1 S1 Cu1 112.20(11) . . ?
Cu3 S1 Cu1 119.44(3) 3 . ?
C7 S2 C5 105.51(16) . . ?
C7 S2 Cu2 108.15(11) . . ?
C5 S2 Cu2 103.85(11) . . ?
C7 S2 Cu1 107.46(11) . . ?
C5 S2 Cu1 113.22(10) . . ?
Cu2 S2 Cu1 117.91(3) . . ?
C9 S3 C11 98.93(16) . . ?
C9 S3 Cu3 107.16(10) . . ?
C11 S3 Cu3 106.22(13) . . ?
#===END

data_cubr115K
 
_audit_creation_method            SHELXL-97
_chemical_name_systematic
;
 ?
;
_chemical_name_common             ?
_chemical_melting_point           ?
_chemical_formula_moiety          
 'C12 H30 Br3 Cu3 S3'
_chemical_formula_sum
 'C12 H30 Br3 Cu3 S3'
_chemical_formula_weight          700.89
 
loop_
 _atom_type_symbol
 _atom_type_description
 _atom_type_scat_dispersion_real
 _atom_type_scat_dispersion_imag
 _atom_type_scat_source
 'C'  'C'   0.0033   0.0016
 'International Tables Vol C Tables 4.2.6.8 and 6.1.1.4'
 'H'  'H'   0.0000   0.0000
 'International Tables Vol C Tables 4.2.6.8 and 6.1.1.4'
 'Br'  'Br'  -0.2901   2.4595
 'International Tables Vol C Tables 4.2.6.8 and 6.1.1.4'
 'Cu'  'Cu'   0.3201   1.2651
 'International Tables Vol C Tables 4.2.6.8 and 6.1.1.4'
 'S'  'S'   0.1246   0.1234
 'International Tables Vol C Tables 4.2.6.8 and 6.1.1.4'
 
_symmetry_cell_setting            orthorhombic
_symmetry_space_group_name_H-M    'P b c n'
_symmetry_space_group_name_hall   '-P 2n 2ab'
 
loop_
 _symmetry_equiv_pos_as_xyz
 'x, y, z'
 '-x+1/2, -y+1/2, z+1/2'
 'x+1/2, -y+1/2, -z'
 '-x, y, -z+1/2'
 '-x, -y, -z'
 'x-1/2, y-1/2, -z-1/2'
 '-x-1/2, y-1/2, z'
 'x, -y, z-1/2'
 
_cell_length_a                    14.675(5)
_cell_length_b                    12.9230(3)
_cell_length_c                    23.3158(4)
_cell_angle_alpha                 90.00
_cell_angle_beta                  90.00
_cell_angle_gamma                 90.00
_cell_volume                      4421.7(15)
_cell_formula_units_Z             8
_cell_measurement_temperature     115(2)
_cell_measurement_reflns_used     5571
_cell_measurement_theta_min        0.998
_cell_measurement_theta_max        27.485
 
_exptl_crystal_description        Prism
_exptl_crystal_colour             colourless
_exptl_crystal_size_max           0.22
_exptl_crystal_size_mid           0.20
_exptl_crystal_size_min           0.12
_exptl_crystal_density_meas       ?
_exptl_crystal_density_diffrn     2.106
_exptl_crystal_density_method     'not measured'
_exptl_crystal_F_000              2736
_exptl_absorpt_coefficient_mu     8.556
_exptl_absorpt_correction_type  multi-scan
_exptl_absorpt_process_details
;
[c.f. r.h. blessing, acta cryst. (1995), a51, 33-38]
;
_exptl_absorpt_correction_T_min   0.1134
_exptl_absorpt_correction_T_max   0.2577

_exptl_special_details
;
 ?
;
 
_diffrn_ambient_temperature       115(2)
_diffrn_radiation_wavelength      0.71073
_diffrn_radiation_type            MoK\a
_diffrn_radiation_source          'fine-focus sealed tube'
_diffrn_radiation_monochromator   graphite
_diffrn_measurement_device_type   'Nonius Kappa APEX-II'
_diffrn_measurement_method        CCD
_diffrn_detector_area_resol_mean  ?
_diffrn_standards_number          ?
_diffrn_standards_interval_count  ?
_diffrn_standards_interval_time   ?
_diffrn_standards_decay_%         ?
_diffrn_reflns_number             33594
_diffrn_reflns_av_R_equivalents   0.0712
_diffrn_reflns_av_sigmaI/netI     0.0370
_diffrn_reflns_limit_h_min        -19
_diffrn_reflns_limit_h_max        18
_diffrn_reflns_limit_k_min        -16
_diffrn_reflns_limit_k_max        16
_diffrn_reflns_limit_l_min        -30
_diffrn_reflns_limit_l_max        30
_diffrn_reflns_theta_min          2.10
_diffrn_reflns_theta_max          27.48
_reflns_number_total              5079
_reflns_number_gt                 4304
_reflns_threshold_expression      >2sigma(I)
 
_computing_data_collection        'Collect (Bruker AXS BV, 1997-2004)'
_computing_cell_refinement        'HKL Scalepack (Otwinowski & Minor 1997)'
_computing_data_reduction         
'HKL Denzo and Scalepack (Otwinowski & Minor 1997)'
_computing_structure_solution     'SIR92 (Altomare et al., 1993)'
_computing_structure_refinement   'SHELXL-97 (Sheldrick, 1997)'
_computing_molecular_graphics     'ORTEP3 (Farrugia,1997)'
_computing_publication_material   
'WinGX publication routines (Farrugia, 1999)'
 
_refine_special_details
;
 Refinement of F^2^ against ALL reflections.  The weighted R-factor wR and
 goodness of fit S are based on F^2^, conventional R-factors R are based
 on F, with F set to zero for negative F^2^. The threshold expression of
 F^2^ > 2sigma(F^2^) is used only for calculating R-factors(gt) etc. and is
 not relevant to the choice of reflections for refinement.  R-factors based
 on F^2^ are statistically about twice as large as those based on F, and R-
 factors based on ALL data will be even larger.
;
 
_refine_ls_structure_factor_coef  Fsqd
_refine_ls_matrix_type            full
_refine_ls_weighting_scheme       calc
_refine_ls_weighting_details
 'calc w=1/[\s^2^(Fo^2^)+(0.0181P)^2^+16.0225P] where P=(Fo^2^+2Fc^2^)/3'
_atom_sites_solution_primary      direct
_atom_sites_solution_secondary    difmap
_atom_sites_solution_hydrogens    geom
_refine_ls_hydrogen_treatment     noref
_refine_ls_extinction_method      none
_refine_ls_extinction_coef        ?
_refine_ls_number_reflns          5079
_refine_ls_number_parameters      196
_refine_ls_number_restraints      0
_refine_ls_number_constraints     0
_refine_ls_R_factor_all           0.0494
_refine_ls_R_factor_gt            0.0370
_refine_ls_wR_factor_ref          0.0741
_refine_ls_wR_factor_gt           0.0694
_refine_ls_goodness_of_fit_ref    1.114
_refine_ls_restrained_S_all       1.114
_refine_ls_shift/su_max           0.001
_refine_ls_shift/su_mean          0.000
 
loop_
 _atom_site_label
 _atom_site_type_symbol
 _atom_site_fract_x
 _atom_site_fract_y
 _atom_site_fract_z
 _atom_site_U_iso_or_equiv
 _atom_site_adp_type
 _atom_site_occupancy
 _atom_site_symmetry_multiplicity
 _atom_site_calc_flag
 _atom_site_refinement_flags
 _atom_site_disorder_assembly
 _atom_site_disorder_group
C1 C -0.3904(4) -0.0662(4) 0.1912(2) 0.0327(11) Uani 1 1 d . . .
H1A H -0.3477 -0.1136 0.2110 0.039 Uiso 1 1 calc R . .
H1B H -0.4294 -0.0331 0.2206 0.039 Uiso 1 1 calc R . .
C2 C -0.4497(4) -0.1277(4) 0.1496(3) 0.0476(16) Uani 1 1 d . . .
H2A H -0.4941 -0.0813 0.1316 0.071 Uiso 1 1 calc R . .
H2B H -0.4819 -0.1823 0.1705 0.071 Uiso 1 1 calc R . .
H2C H -0.4111 -0.1588 0.1199 0.071 Uiso 1 1 calc R . .
C3 C -0.2502(3) 0.0721(3) 0.21022(18) 0.0222(9) Uani 1 1 d . . .
H3A H -0.2857 0.1058 0.2411 0.027 Uiso 1 1 calc R . .
H3B H -0.2197 0.0105 0.2266 0.027 Uiso 1 1 calc R . .
C4 C -0.1792(3) 0.1468(4) 0.18786(19) 0.0245(10) Uani 1 1 d . . .
H4A H -0.1438 0.1133 0.1574 0.037 Uiso 1 1 calc R . .
H4B H -0.1384 0.1669 0.2192 0.037 Uiso 1 1 calc R . .
H4C H -0.2094 0.2084 0.1725 0.037 Uiso 1 1 calc R . .
C5 C -0.4323(3) 0.1875(3) -0.00554(19) 0.0250(10) Uani 1 1 d . . .
H5A H -0.4991 0.1793 -0.0091 0.030 Uiso 1 1 calc R . .
H5B H -0.4103 0.2232 -0.0405 0.030 Uiso 1 1 calc R . .
C6 C -0.3892(3) 0.0817(3) -0.00258(19) 0.0254(10) Uani 1 1 d . . .
H6A H -0.3232 0.0890 0.0023 0.038 Uiso 1 1 calc R . .
H6B H -0.4018 0.0440 -0.0382 0.038 Uiso 1 1 calc R . .
H6C H -0.4146 0.0435 0.0300 0.038 Uiso 1 1 calc R . .
C7 C -0.2849(3) 0.2905(4) 0.05187(19) 0.0235(10) Uani 1 1 d . . .
H7A H -0.2656 0.3321 0.0854 0.028 Uiso 1 1 calc R . .
H7B H -0.2534 0.2229 0.0542 0.028 Uiso 1 1 calc R . .
C8 C -0.2543(3) 0.3449(4) -0.0019(2) 0.0312(11) Uani 1 1 d . . .
H8A H -0.2724 0.3041 -0.0355 0.047 Uiso 1 1 calc R . .
H8B H -0.1879 0.3526 -0.0014 0.047 Uiso 1 1 calc R . .
H8C H -0.2829 0.4134 -0.0039 0.047 Uiso 1 1 calc R . .
C9 C -0.6983(3) 0.4017(4) 0.10764(18) 0.0230(10) Uani 1 1 d . . .
H9A H -0.7161 0.4675 0.0890 0.028 Uiso 1 1 calc R . .
H9B H -0.7030 0.3462 0.0785 0.028 Uiso 1 1 calc R . .
C10 C -0.7649(3) 0.3790(4) 0.15532(19) 0.0258(10) Uani 1 1 d . . .
H10A H -0.7457 0.3166 0.1759 0.039 Uiso 1 1 calc R . .
H10B H -0.8258 0.3682 0.1391 0.039 Uiso 1 1 calc R . .
H10C H -0.7665 0.4376 0.1820 0.039 Uiso 1 1 calc R . .
C11 C -0.5773(3) 0.5276(3) 0.17366(18) 0.0189(9) Uani 1 1 d . . .
H11A H -0.6122 0.5152 0.2093 0.023 Uiso 1 1 calc R . .
H11B H -0.5132 0.5412 0.1847 0.023 Uiso 1 1 calc R . .
C12 C -0.6151(4) 0.6239(3) 0.1447(2) 0.0321(12) Uani 1 1 d . . .
H12A H -0.5853 0.6333 0.1074 0.048 Uiso 1 1 calc R . .
H12B H -0.6034 0.6844 0.1689 0.048 Uiso 1 1 calc R . .
H12C H -0.6809 0.6159 0.1391 0.048 Uiso 1 1 calc R . .
Br1 Br -0.58648(3) 0.11760(3) 0.14787(2) 0.02459(11) Uani 1 1 d . . .
Br2 Br -0.38144(3) 0.31284(3) 0.209862(17) 0.01883(10) Uani 1 1 d . . .
Br3 Br -0.40880(3) 0.58589(3) 0.036820(17) 0.01905(10) Uani 1 1 d . . .
Cu1 Cu -0.42501(4) 0.16605(4) 0.13820(2) 0.01907(12) Uani 1 1 d . . .
Cu2 Cu -0.55232(4) 0.27948(4) 0.19497(2) 0.02133(13) Uani 1 1 d . . .
Cu3 Cu -0.49052(4) 0.42166(4) 0.04855(2) 0.01842(12) Uani 1 1 d . . .
S1 S -0.32663(8) 0.03216(8) 0.15305(5) 0.0207(2) Uani 1 1 d . . .
S2 S -0.40759(7) 0.26837(8) 0.05677(4) 0.0161(2) Uani 1 1 d . . .
S3 S -0.58065(7) 0.41146(8) 0.13062(4) 0.0161(2) Uani 1 1 d . . .
 
loop_
 _atom_site_aniso_label
 _atom_site_aniso_U_11
 _atom_site_aniso_U_22
 _atom_site_aniso_U_33
 _atom_site_aniso_U_23
 _atom_site_aniso_U_13
 _atom_site_aniso_U_12
C1 0.035(3) 0.023(2) 0.041(3) 0.007(2) -0.006(2) -0.003(2)
C2 0.042(3) 0.021(3) 0.079(5) 0.004(3) -0.024(3) -0.002(3)
C3 0.024(2) 0.024(2) 0.019(2) 0.0013(18) -0.0037(18) 0.003(2)
C4 0.021(2) 0.031(2) 0.022(2) 0.0022(19) -0.0011(18) 0.000(2)
C5 0.035(3) 0.020(2) 0.019(2) -0.0034(18) -0.0075(19) 0.001(2)
C6 0.039(3) 0.021(2) 0.017(2) -0.0008(17) 0.0017(19) 0.006(2)
C7 0.018(2) 0.026(2) 0.027(2) -0.0023(19) 0.0035(18) -0.0003(19)
C8 0.028(3) 0.032(3) 0.033(3) 0.009(2) 0.014(2) 0.003(2)
C9 0.019(2) 0.031(2) 0.019(2) -0.0003(18) -0.0022(17) -0.005(2)
C10 0.020(2) 0.035(3) 0.023(2) 0.003(2) -0.0022(18) 0.000(2)
C11 0.022(2) 0.016(2) 0.019(2) -0.0004(16) 0.0012(17) -0.0026(18)
C12 0.043(3) 0.015(2) 0.038(3) 0.003(2) 0.007(2) 0.005(2)
Br1 0.0206(2) 0.0209(2) 0.0324(2) -0.00587(18) 0.00263(18) -0.00321(19)
Br2 0.0195(2) 0.0216(2) 0.01539(19) -0.00322(16) 0.00145(16) -0.00247(18)
Br3 0.0211(2) 0.0201(2) 0.0159(2) 0.00121(16) -0.00301(16) -0.00296(18)
Cu1 0.0200(3) 0.0190(3) 0.0182(3) 0.0019(2) 0.0001(2) 0.0015(2)
Cu2 0.0250(3) 0.0191(3) 0.0199(3) 0.0009(2) 0.0027(2) 0.0017(2)
Cu3 0.0204(3) 0.0195(3) 0.0154(2) 0.0013(2) 0.0003(2) 0.0002(2)
S1 0.0218(6) 0.0202(5) 0.0202(5) -0.0014(4) -0.0038(4) 0.0037(5)
S2 0.0178(5) 0.0165(5) 0.0141(4) 0.0002(4) -0.0002(4) 0.0017(4)
S3 0.0178(5) 0.0163(5) 0.0143(5) -0.0006(4) 0.0021(4) -0.0009(4)
 
_geom_special_details
;
 All esds (except the esd in the dihedral angle between two l.s. planes)
 are estimated using the full covariance matrix.  The cell esds are taken
 into account individually in the estimation of esds in distances, angles
 and torsion angles; correlations between esds in cell parameters are only
 used when they are defined by crystal symmetry.  An approximate (isotropic)
 treatment of cell esds is used for estimating esds involving l.s. planes.
;
 
loop_
 _geom_bond_atom_site_label_1
 _geom_bond_atom_site_label_2
 _geom_bond_distance
 _geom_bond_site_symmetry_2
 _geom_bond_publ_flag
C1 C2 1.526(7) . ?
C1 S1 1.813(5) . ?
C1 H1A 0.9900 . ?
C1 H1B 0.9900 . ?
C2 H2A 0.9800 . ?
C2 H2B 0.9800 . ?
C2 H2C 0.9800 . ?
C3 C4 1.513(6) . ?
C3 S1 1.817(4) . ?
C3 H3A 0.9900 . ?
C3 H3B 0.9900 . ?
C4 H4A 0.9800 . ?
C4 H4B 0.9800 . ?
C4 H4C 0.9800 . ?
C5 C6 1.507(6) . ?
C5 S2 1.826(4) . ?
C5 H5A 0.9900 . ?
C5 H5B 0.9900 . ?
C6 H6A 0.9800 . ?
C6 H6B 0.9800 . ?
C6 H6C 0.9800 . ?
C7 C8 1.506(6) . ?
C7 S2 1.826(5) . ?
C7 H7A 0.9900 . ?
C7 H7B 0.9900 . ?
C8 H8A 0.9800 . ?
C8 H8B 0.9800 . ?
C8 H8C 0.9800 . ?
C9 C10 1.509(6) . ?
C9 S3 1.812(4) . ?
C9 H9A 0.9900 . ?
C9 H9B 0.9900 . ?
C10 H10A 0.9800 . ?
C10 H10B 0.9800 . ?
C10 H10C 0.9800 . ?
C11 C12 1.520(6) . ?
C11 S3 1.807(4) . ?
C11 H11A 0.9900 . ?
C11 H11B 0.9900 . ?
C12 H12A 0.9800 . ?
C12 H12B 0.9800 . ?
C12 H12C 0.9800 . ?
Br1 Cu2 2.4153(7) . ?
Br1 Cu1 2.4612(11) . ?
Br2 Cu2 2.4606(7) 4_455 ?
Br2 Cu2 2.5679(11) . ?
Br2 Cu1 2.6075(7) . ?
Br3 Cu3 2.4530(7) . ?
Br3 Cu3 2.4808(7) 5_465 ?
Cu1 S1 2.2799(12) . ?
Cu1 S2 2.3278(11) . ?
Cu1 Cu2 2.7187(9) . ?
Cu2 S3 2.3094(11) . ?
Cu2 Br2 2.4606(7) 4_455 ?
Cu2 Cu2 2.9904(11) 4_455 ?
Cu3 S3 2.3298(11) . ?
Cu3 S2 2.3328(12) . ?
Cu3 Br3 2.4808(7) 5_465 ?
Cu3 Cu3 3.0502(10) 5_465 ?
 
loop_
 _geom_angle_atom_site_label_1
 _geom_angle_atom_site_label_2
 _geom_angle_atom_site_label_3
 _geom_angle
 _geom_angle_site_symmetry_1
 _geom_angle_site_symmetry_3
 _geom_angle_publ_flag
C2 C1 S1 110.3(4) . . ?
C2 C1 H1A 109.6 . . ?
S1 C1 H1A 109.6 . . ?
C2 C1 H1B 109.6 . . ?
S1 C1 H1B 109.6 . . ?
H1A C1 H1B 108.1 . . ?
C1 C2 H2A 109.5 . . ?
C1 C2 H2B 109.5 . . ?
H2A C2 H2B 109.5 . . ?
C1 C2 H2C 109.5 . . ?
H2A C2 H2C 109.5 . . ?
H2B C2 H2C 109.5 . . ?
C4 C3 S1 110.7(3) . . ?
C4 C3 H3A 109.5 . . ?
S1 C3 H3A 109.5 . . ?
C4 C3 H3B 109.5 . . ?
S1 C3 H3B 109.5 . . ?
H3A C3 H3B 108.1 . . ?
C3 C4 H4A 109.5 . . ?
C3 C4 H4B 109.5 . . ?
H4A C4 H4B 109.5 . . ?
C3 C4 H4C 109.5 . . ?
H4A C4 H4C 109.5 . . ?
H4B C4 H4C 109.5 . . ?
C6 C5 S2 113.5(3) . . ?
C6 C5 H5A 108.9 . . ?
S2 C5 H5A 108.9 . . ?
C6 C5 H5B 108.9 . . ?
S2 C5 H5B 108.9 . . ?
H5A C5 H5B 107.7 . . ?
C5 C6 H6A 109.5 . . ?
C5 C6 H6B 109.5 . . ?
H6A C6 H6B 109.5 . . ?
C5 C6 H6C 109.5 . . ?
H6A C6 H6C 109.5 . . ?
H6B C6 H6C 109.5 . . ?
C8 C7 S2 114.8(3) . . ?
C8 C7 H7A 108.6 . . ?
S2 C7 H7A 108.6 . . ?
C8 C7 H7B 108.6 . . ?
S2 C7 H7B 108.6 . . ?
H7A C7 H7B 107.6 . . ?
C7 C8 H8A 109.5 . . ?
C7 C8 H8B 109.5 . . ?
H8A C8 H8B 109.5 . . ?
C7 C8 H8C 109.5 . . ?
H8A C8 H8C 109.5 . . ?
H8B C8 H8C 109.5 . . ?
C10 C9 S3 114.4(3) . . ?
C10 C9 H9A 108.7 . . ?
S3 C9 H9A 108.7 . . ?
C10 C9 H9B 108.7 . . ?
S3 C9 H9B 108.7 . . ?
H9A C9 H9B 107.6 . . ?
C9 C10 H10A 109.5 . . ?
C9 C10 H10B 109.5 . . ?
H10A C10 H10B 109.5 . . ?
C9 C10 H10C 109.5 . . ?
H10A C10 H10C 109.5 . . ?
H10B C10 H10C 109.5 . . ?
C12 C11 S3 115.0(3) . . ?
C12 C11 H11A 108.5 . . ?
S3 C11 H11A 108.5 . . ?
C12 C11 H11B 108.5 . . ?
S3 C11 H11B 108.5 . . ?
H11A C11 H11B 107.5 . . ?
C11 C12 H12A 109.5 . . ?
C11 C12 H12B 109.5 . . ?
H12A C12 H12B 109.5 . . ?
C11 C12 H12C 109.5 . . ?
H12A C12 H12C 109.5 . . ?
H12B C12 H12C 109.5 . . ?
Cu2 Br1 Cu1 67.76(2) . . ?
Cu2 Br2 Cu2 72.95(2) 4_455 . ?
Cu2 Br2 Cu1 110.70(2) 4_455 . ?
Cu2 Br2 Cu1 63.372(19) . . ?
Cu3 Br3 Cu3 76.37(2) . 5_465 ?
S1 Cu1 S2 119.04(4) . . ?
S1 Cu1 Br1 113.75(4) . . ?
S2 Cu1 Br1 108.96(3) . . ?
S1 Cu1 Br2 107.43(4) . . ?
S2 Cu1 Br2 94.73(3) . . ?
Br1 Cu1 Br2 111.25(2) . . ?
S1 Cu1 Cu2 140.39(4) . . ?
S2 Cu1 Cu2 99.57(3) . . ?
Br1 Cu1 Cu2 55.32(2) . . ?
Br2 Cu1 Cu2 57.60(2) . . ?
S3 Cu2 Br1 107.87(3) . . ?
S3 Cu2 Br2 112.67(3) . 4_455 ?
Br1 Cu2 Br2 118.67(3) . 4_455 ?
S3 Cu2 Br2 98.03(3) . . ?
Br1 Cu2 Br2 114.18(3) . . ?
Br2 Cu2 Br2 103.56(3) 4_455 . ?
S3 Cu2 Cu1 101.87(3) . . ?
Br1 Cu2 Cu1 56.92(2) . . ?
Br2 Cu2 Cu1 143.61(3) 4_455 . ?
Br2 Cu2 Cu1 59.02(2) . . ?
S3 Cu2 Cu2 130.54(3) . 4_455 ?
Br1 Cu2 Cu2 119.787(17) . 4_455 ?
Br2 Cu2 Cu2 55.18(2) 4_455 4_455 ?
Br2 Cu2 Cu2 51.87(2) . 4_455 ?
Cu1 Cu2 Cu2 93.73(3) . 4_455 ?
S3 Cu3 S2 100.41(4) . . ?
S3 Cu3 Br3 114.71(3) . . ?
S2 Cu3 Br3 119.26(4) . . ?
S3 Cu3 Br3 108.58(4) . 5_465 ?
S2 Cu3 Br3 110.07(3) . 5_465 ?
Br3 Cu3 Br3 103.63(2) . 5_465 ?
S3 Cu3 Cu3 126.54(4) . 5_465 ?
S2 Cu3 Cu3 132.24(4) . 5_465 ?
Br3 Cu3 Cu3 52.226(19) . 5_465 ?
Br3 Cu3 Cu3 51.403(18) 5_465 5_465 ?
C1 S1 C3 99.1(2) . . ?
C1 S1 Cu1 106.26(18) . . ?
C3 S1 Cu1 106.65(15) . . ?
C7 S2 C5 103.6(2) . . ?
C7 S2 Cu1 104.37(15) . . ?
C5 S2 Cu1 107.57(15) . . ?
C7 S2 Cu3 112.09(16) . . ?
C5 S2 Cu3 108.50(15) . . ?
Cu1 S2 Cu3 119.48(5) . . ?
C11 S3 C9 104.4(2) . . ?
C11 S3 Cu2 104.36(14) . . ?
C9 S3 Cu2 108.18(15) . . ?
C11 S3 Cu3 113.18(14) . . ?
C9 S3 Cu3 107.59(14) . . ?
Cu2 S3 Cu3 118.24(5) . . ?
 
loop_
 _geom_torsion_atom_site_label_1
 _geom_torsion_atom_site_label_2
 _geom_torsion_atom_site_label_3
 _geom_torsion_atom_site_label_4
 _geom_torsion
 _geom_torsion_site_symmetry_1
 _geom_torsion_site_symmetry_2
 _geom_torsion_site_symmetry_3
 _geom_torsion_site_symmetry_4
 _geom_torsion_publ_flag
Cu2 Br1 Cu1 S1 135.98(4) . . . . ?
Cu2 Br1 Cu1 S2 -88.63(4) . . . . ?
Cu2 Br1 Cu1 Br2 14.50(2) . . . . ?
Cu2 Br2 Cu1 S1 -81.91(4) 4_455 . . . ?
Cu2 Br2 Cu1 S1 -139.21(4) . . . . ?
Cu2 Br2 Cu1 S2 155.65(3) 4_455 . . . ?
Cu2 Br2 Cu1 S2 98.35(3) . . . . ?
Cu2 Br2 Cu1 Br1 43.19(3) 4_455 . . . ?
Cu2 Br2 Cu1 Br1 -14.11(2) . . . . ?
Cu2 Br2 Cu1 Cu2 57.30(2) 4_455 . . . ?
Cu1 Br1 Cu2 S3 92.74(4) . . . . ?
Cu1 Br1 Cu2 Br2 -137.63(3) . . . 4_455 ?
Cu1 Br1 Cu2 Br2 -15.06(2) . . . . ?
Cu1 Br1 Cu2 Cu2 -73.53(4) . . . 4_455 ?
Cu2 Br2 Cu2 S3 136.36(3) 4_455 . . . ?
Cu1 Br2 Cu2 S3 -99.06(3) . . . . ?
Cu2 Br2 Cu2 Br1 -109.87(2) 4_455 . . . ?
Cu1 Br2 Cu2 Br1 14.71(2) . . . . ?
Cu2 Br2 Cu2 Br2 20.62(3) 4_455 . . 4_455 ?
Cu1 Br2 Cu2 Br2 145.19(3) . . . 4_455 ?
Cu2 Br2 Cu2 Cu1 -124.575(19) 4_455 . . . ?
Cu1 Br2 Cu2 Cu2 124.575(19) . . . 4_455 ?
S1 Cu1 Cu2 S3 170.17(6) . . . . ?
S2 Cu1 Cu2 S3 2.77(4) . . . . ?
Br1 Cu1 Cu2 S3 -103.73(4) . . . . ?
Br2 Cu1 Cu2 S3 92.31(3) . . . . ?
S1 Cu1 Cu2 Br1 -86.10(6) . . . . ?
S2 Cu1 Cu2 Br1 106.50(4) . . . . ?
Br2 Cu1 Cu2 Br1 -163.96(3) . . . . ?
S1 Cu1 Cu2 Br2 8.57(9) . . . 4_455 ?
S2 Cu1 Cu2 Br2 -158.83(5) . . . 4_455 ?
Br1 Cu1 Cu2 Br2 94.67(5) . . . 4_455 ?
Br2 Cu1 Cu2 Br2 -69.29(4) . . . 4_455 ?
S1 Cu1 Cu2 Br2 77.86(6) . . . . ?
S2 Cu1 Cu2 Br2 -89.54(3) . . . . ?
Br1 Cu1 Cu2 Br2 163.96(3) . . . . ?
S1 Cu1 Cu2 Cu2 37.39(6) . . . 4_455 ?
S2 Cu1 Cu2 Cu2 -130.02(3) . . . 4_455 ?
Br1 Cu1 Cu2 Cu2 123.48(2) . . . 4_455 ?
Br2 Cu1 Cu2 Cu2 -40.472(18) . . . 4_455 ?
Cu3 Br3 Cu3 S3 -118.20(4) 5_465 . . . ?
Cu3 Br3 Cu3 S2 122.73(4) 5_465 . . . ?
Cu3 Br3 Cu3 Br3 0.0 5_465 . . 5_465 ?
C2 C1 S1 C3 -169.8(4) . . . . ?
C2 C1 S1 Cu1 79.8(4) . . . . ?
C4 C3 S1 C1 172.9(3) . . . . ?
C4 C3 S1 Cu1 -77.0(3) . . . . ?
S2 Cu1 S1 C1 -149.07(18) . . . . ?
Br1 Cu1 S1 C1 -18.50(18) . . . . ?
Br2 Cu1 S1 C1 105.08(18) . . . . ?
Cu2 Cu1 S1 C1 45.17(19) . . . . ?
S2 Cu1 S1 C3 105.94(16) . . . . ?
Br1 Cu1 S1 C3 -123.50(15) . . . . ?
Br2 Cu1 S1 C3 0.08(16) . . . . ?
Cu2 Cu1 S1 C3 -59.82(17) . . . . ?
C8 C7 S2 C5 60.5(4) . . . . ?
C8 C7 S2 Cu1 173.0(3) . . . . ?
C8 C7 S2 Cu3 -56.3(4) . . . . ?
C6 C5 S2 C7 66.0(4) . . . . ?
C6 C5 S2 Cu1 -44.2(4) . . . . ?
C6 C5 S2 Cu3 -174.7(3) . . . . ?
S1 Cu1 S2 C7 -43.31(16) . . . . ?
Br1 Cu1 S2 C7 -175.98(15) . . . . ?
Br2 Cu1 S2 C7 69.63(16) . . . . ?
Cu2 Cu1 S2 C7 127.54(16) . . . . ?
S1 Cu1 S2 C5 66.33(18) . . . . ?
Br1 Cu1 S2 C5 -66.34(17) . . . . ?
Br2 Cu1 S2 C5 179.27(17) . . . . ?
Cu2 Cu1 S2 C5 -122.82(17) . . . . ?
S1 Cu1 S2 Cu3 -169.52(5) . . . . ?
Br1 Cu1 S2 Cu3 57.81(6) . . . . ?
Br2 Cu1 S2 Cu3 -56.58(5) . . . . ?
Cu2 Cu1 S2 Cu3 1.33(6) . . . . ?
S3 Cu3 S2 C7 -127.27(16) . . . . ?
Br3 Cu3 S2 C7 -1.09(17) . . . . ?
Br3 Cu3 S2 C7 118.40(16) 5_465 . . . ?
Cu3 Cu3 S2 C7 62.83(17) 5_465 . . . ?
S3 Cu3 S2 C5 118.92(18) . . . . ?
Br3 Cu3 S2 C5 -114.91(17) . . . . ?
Br3 Cu3 S2 C5 4.59(18) 5_465 . . . ?
Cu3 Cu3 S2 C5 -50.98(18) 5_465 . . . ?
S3 Cu3 S2 Cu1 -4.78(6) . . . . ?
Br3 Cu3 S2 Cu1 121.39(5) . . . . ?
Br3 Cu3 S2 Cu1 -119.11(5) 5_465 . . . ?
Cu3 Cu3 S2 Cu1 -174.69(4) 5_465 . . . ?
C12 C11 S3 C9 -53.1(4) . . . . ?
C12 C11 S3 Cu2 -166.6(3) . . . . ?
C12 C11 S3 Cu3 63.6(4) . . . . ?
C10 C9 S3 C11 -67.8(4) . . . . ?
C10 C9 S3 Cu2 42.9(4) . . . . ?
C10 C9 S3 Cu3 171.7(3) . . . . ?
Br1 Cu2 S3 C11 168.03(15) . . . . ?
Br2 Cu2 S3 C11 35.11(15) 4_455 . . . ?
Br2 Cu2 S3 C11 -73.28(15) . . . . ?
Cu1 Cu2 S3 C11 -133.18(15) . . . . ?
Cu2 Cu2 S3 C11 -27.69(16) 4_455 . . . ?
Br1 Cu2 S3 C9 57.30(16) . . . . ?
Br2 Cu2 S3 C9 -75.61(16) 4_455 . . . ?
Br2 Cu2 S3 C9 176.00(16) . . . . ?
Cu1 Cu2 S3 C9 116.09(16) . . . . ?
Cu2 Cu2 S3 C9 -138.42(16) 4_455 . . . ?
Br1 Cu2 S3 Cu3 -65.19(6) . . . . ?
Br2 Cu2 S3 Cu3 161.89(4) 4_455 . . . ?
Br2 Cu2 S3 Cu3 53.50(5) . . . . ?
Cu1 Cu2 S3 Cu3 -6.41(6) . . . . ?
Cu2 Cu2 S3 Cu3 99.08(6) 4_455 . . . ?
S2 Cu3 S3 C11 129.47(16) . . . . ?
Br3 Cu3 S3 C11 0.29(16) . . . . ?
Br3 Cu3 S3 C11 -115.07(16) 5_465 . . . ?
Cu3 Cu3 S3 C11 -59.83(17) 5_465 . . . ?
S2 Cu3 S3 C9 -115.75(17) . . . . ?
Br3 Cu3 S3 C9 115.07(17) . . . . ?
Br3 Cu3 S3 C9 -0.29(17) 5_465 . . . ?
Cu3 Cu3 S3 C9 54.96(17) 5_465 . . . ?
S2 Cu3 S3 Cu2 7.05(6) . . . . ?
Br3 Cu3 S3 Cu2 -122.13(5) . . . . ?
Br3 Cu3 S3 Cu2 122.51(5) 5_465 . . . ?
Cu3 Cu3 S3 Cu2 177.75(4) 5_465 . . . ?
 
_diffrn_measured_fraction_theta_max    1.000
_diffrn_reflns_theta_full              27.48
_diffrn_measured_fraction_theta_full   1.000
_refine_diff_density_max    0.751
_refine_diff_density_min   -0.648
_refine_diff_density_rms    0.139
#===END

data_cubr195k

_audit_creation_method            SHELXL-97
_chemical_name_systematic
;
 ?
;
_chemical_name_common             ?
_chemical_melting_point           ?
_chemical_formula_moiety
 'C12 H30 Br3 Cu3 S3'
_chemical_formula_sum
 'C12 H30 Br3 Cu3 S3'
_chemical_formula_weight          700.89

loop_
 _atom_type_symbol
 _atom_type_description
 _atom_type_scat_dispersion_real
 _atom_type_scat_dispersion_imag
 _atom_type_scat_source
 'C'  'C'   0.0033   0.0016
 'International Tables Vol C Tables 4.2.6.8 and 6.1.1.4'
 'H'  'H'   0.0000   0.0000
 'International Tables Vol C Tables 4.2.6.8 and 6.1.1.4'
 'Br'  'Br'  -0.2901   2.4595
 'International Tables Vol C Tables 4.2.6.8 and 6.1.1.4'
 'Cu'  'Cu'   0.3201   1.2651
 'International Tables Vol C Tables 4.2.6.8 and 6.1.1.4'
 'S'  'S'   0.1246   0.1234
 'International Tables Vol C Tables 4.2.6.8 and 6.1.1.4'
 
_symmetry_cell_setting            orthorhombic
_symmetry_space_group_name_H-M    'P b c n'
_symmetry_space_group_name_hall   '-P 2n 2ab'
 
loop_
 _symmetry_equiv_pos_as_xyz
 'x, y, z'
 '-x+1/2, -y+1/2, z+1/2'
 'x+1/2, -y+1/2, -z'
 '-x, y, -z+1/2'
 '-x, -y, -z'
 'x-1/2, y-1/2, -z-1/2'
 '-x-1/2, y-1/2, z'
 'x, -y, z-1/2'
 
_cell_length_a                    14.7918(4)
_cell_length_b                    12.9259(3)
_cell_length_c                    23.4291(6)
_cell_angle_alpha                 90.00
_cell_angle_beta                  90.00
_cell_angle_gamma                 90.00
_cell_volume                      4479.6(2)
_cell_formula_units_Z             8
_cell_measurement_temperature     195(2)
_cell_measurement_reflns_used     5377
_cell_measurement_theta_min        0.998
_cell_measurement_theta_max        27.485
 
_exptl_crystal_description        Prism
_exptl_crystal_colour             colourless
_exptl_crystal_size_max           0.22
_exptl_crystal_size_mid           0.20
_exptl_crystal_size_min           0.12
_exptl_crystal_density_meas       ?
_exptl_crystal_density_diffrn     2.079
_exptl_crystal_density_method     'not measured'
_exptl_crystal_F_000              2736
_exptl_absorpt_coefficient_mu     8.446
_exptl_absorpt_correction_type  multi-scan
_exptl_absorpt_process_details
;
[c.f. r.h. blessing, acta cryst. (1995), a51, 33-38]
;
_exptl_absorpt_correction_T_min   0.1183
_exptl_absorpt_correction_T_max   0.2746
 
_exptl_special_details
;
 ?
;
 
_diffrn_ambient_temperature       195(2)
_diffrn_radiation_wavelength      0.71073
_diffrn_radiation_type            MoK\a
_diffrn_radiation_source          'fine-focus sealed tube'
_diffrn_radiation_monochromator   graphite
_diffrn_measurement_device_type   'Nonius Kappa APEX-II'
_diffrn_measurement_method        CCD
_diffrn_detector_area_resol_mean  ?
_diffrn_standards_number          ?
_diffrn_standards_interval_count  ?
_diffrn_standards_interval_time   ?
_diffrn_standards_decay_%         ?
_diffrn_reflns_number             23045
_diffrn_reflns_av_R_equivalents   0.0775
_diffrn_reflns_av_sigmaI/netI     0.0538
_diffrn_reflns_limit_h_min        -19
_diffrn_reflns_limit_h_max        18
_diffrn_reflns_limit_k_min        -16
_diffrn_reflns_limit_k_max        16
_diffrn_reflns_limit_l_min        -28
_diffrn_reflns_limit_l_max        30
_diffrn_reflns_theta_min          1.74
_diffrn_reflns_theta_max          27.48
_reflns_number_total              5135
_reflns_number_gt                 3870
_reflns_threshold_expression      >2sigma(I)
 
_computing_data_collection        'Collect (Bruker AXS BV, 1997-2004)'
_computing_cell_refinement        'HKL Scalepack (Otwinowski & Minor 1997)'
_computing_data_reduction         
'HKL Denzo and Scalepack (Otwinowski & Minor 1997)'
_computing_structure_solution     'SIR92 (Altomare et al., 1993)'
_computing_structure_refinement   'SHELXL-97 (Sheldrick, 1997)'
_computing_molecular_graphics     'ORTEP3 (Farrugia,1997)'
_computing_publication_material   
'WinGX publication routines (Farrugia, 1999)'
 
_refine_special_details
;
 Refinement of F^2^ against ALL reflections.  The weighted R-factor wR and
 goodness of fit S are based on F^2^, conventional R-factors R are based
 on F, with F set to zero for negative F^2^. The threshold expression of
 F^2^ > 2sigma(F^2^) is used only for calculating R-factors(gt) etc. and is
 not relevant to the choice of reflections for refinement.  R-factors based
 on F^2^ are statistically about twice as large as those based on F, and R-
 factors based on ALL data will be even larger.
;
 
_refine_ls_structure_factor_coef  Fsqd
_refine_ls_matrix_type            full
_refine_ls_weighting_scheme       calc
_refine_ls_weighting_details
 'calc w=1/[\s^2^(Fo^2^)+(0.0198P)^2^+25.9472P] where P=(Fo^2^+2Fc^2^)/3'
_atom_sites_solution_primary      direct
_atom_sites_solution_secondary    difmap
_atom_sites_solution_hydrogens    geom
_refine_ls_hydrogen_treatment     noref
_refine_ls_extinction_method      none
_refine_ls_extinction_coef        ?
_refine_ls_number_reflns          5135
_refine_ls_number_parameters      196
_refine_ls_number_restraints      0
_refine_ls_number_constraints     0
_refine_ls_R_factor_all           0.0802
_refine_ls_R_factor_gt            0.0524
_refine_ls_wR_factor_ref          0.1040
_refine_ls_wR_factor_gt           0.0929
_refine_ls_goodness_of_fit_ref    1.124
_refine_ls_restrained_S_all       1.124
_refine_ls_shift/su_max           0.000
_refine_ls_shift/su_mean          0.000
 
loop_
 _atom_site_label
 _atom_site_type_symbol
 _atom_site_fract_x
 _atom_site_fract_y
 _atom_site_fract_z
 _atom_site_U_iso_or_equiv
 _atom_site_adp_type
 _atom_site_occupancy
 _atom_site_symmetry_multiplicity
 _atom_site_calc_flag
 _atom_site_refinement_flags
 _atom_site_disorder_assembly
 _atom_site_disorder_group
C1 C -0.3914(6) -0.0645(5) 0.1926(4) 0.054(2) Uani 1 1 d . . .
H1A H -0.3491 -0.1120 0.2121 0.065 Uiso 1 1 calc R . .
H1B H -0.4299 -0.0311 0.2219 0.065 Uiso 1 1 calc R . .
C2 C -0.4505(7) -0.1253(6) 0.1509(5) 0.082(4) Uani 1 1 d . . .
H2A H -0.4908 -0.0776 0.1307 0.123 Uiso 1 1 calc R . .
H2B H -0.4867 -0.1760 0.1721 0.123 Uiso 1 1 calc R . .
H2C H -0.4120 -0.1614 0.1233 0.123 Uiso 1 1 calc R . .
C3 C -0.2514(5) 0.0727(5) 0.2101(3) 0.0345(15) Uani 1 1 d . . .
H3A H -0.2859 0.1059 0.2413 0.041 Uiso 1 1 calc R . .
H3B H -0.2206 0.0110 0.2258 0.041 Uiso 1 1 calc R . .
C4 C -0.1820(5) 0.1475(6) 0.1873(3) 0.0432(18) Uani 1 1 d . . .
H4A H -0.1438 0.1123 0.1591 0.065 Uiso 1 1 calc R . .
H4B H -0.1444 0.1728 0.2187 0.065 Uiso 1 1 calc R . .
H4C H -0.2127 0.2060 0.1691 0.065 Uiso 1 1 calc R . .
C5 C -0.4340(5) 0.1885(5) -0.0040(3) 0.0363(16) Uani 1 1 d . . .
H5A H -0.5004 0.1795 -0.0065 0.044 Uiso 1 1 calc R . .
H5B H -0.4139 0.2244 -0.0391 0.044 Uiso 1 1 calc R . .
C6 C -0.3899(6) 0.0830(5) -0.0016(3) 0.0442(19) Uani 1 1 d . . .
H6A H -0.3241 0.0911 0.0002 0.066 Uiso 1 1 calc R . .
H6B H -0.4060 0.0436 -0.0359 0.066 Uiso 1 1 calc R . .
H6C H -0.4110 0.0459 0.0323 0.066 Uiso 1 1 calc R . .
C7 C -0.2868(5) 0.2913(5) 0.0525(3) 0.0376(16) Uani 1 1 d . . .
H7A H -0.2676 0.3334 0.0857 0.045 Uiso 1 1 calc R . .
H7B H -0.2555 0.2238 0.0551 0.045 Uiso 1 1 calc R . .
C8 C -0.2567(6) 0.3452(6) -0.0016(3) 0.054(2) Uani 1 1 d . . .
H8A H -0.2711 0.3017 -0.0346 0.082 Uiso 1 1 calc R . .
H8B H -0.1914 0.3573 -0.0001 0.082 Uiso 1 1 calc R . .
H8C H -0.2883 0.4116 -0.0051 0.082 Uiso 1 1 calc R . .
C9 C -0.6979(5) 0.4013(6) 0.1070(3) 0.0386(17) Uani 1 1 d . . .
H9A H -0.7160 0.4665 0.0880 0.046 Uiso 1 1 calc R . .
H9B H -0.7016 0.3453 0.0782 0.046 Uiso 1 1 calc R . .
C10 C -0.7637(5) 0.3788(6) 0.1537(3) 0.0410(17) Uani 1 1 d . . .
H10A H -0.7441 0.3172 0.1747 0.061 Uiso 1 1 calc R . .
H10B H -0.8237 0.3663 0.1372 0.061 Uiso 1 1 calc R . .
H10C H -0.7667 0.4380 0.1797 0.061 Uiso 1 1 calc R . .
C11 C -0.5781(5) 0.5302(5) 0.1732(3) 0.0418(18) Uani 1 1 d . . .
H11A H -0.6135 0.5185 0.2084 0.050 Uiso 1 1 calc R . .
H11B H -0.5146 0.5430 0.1846 0.050 Uiso 1 1 calc R . .
C12 C -0.6134(7) 0.6248(6) 0.1443(4) 0.062(2) Uani 1 1 d . . .
H12A H -0.5855 0.6313 0.1065 0.092 Uiso 1 1 calc R . .
H12B H -0.5988 0.6858 0.1673 0.092 Uiso 1 1 calc R . .
H12C H -0.6791 0.6192 0.1400 0.092 Uiso 1 1 calc R . .
Br1 Br -0.58605(5) 0.12053(5) 0.14770(3) 0.04082(19) Uani 1 1 d . . .
Br2 Br -0.38280(5) 0.31513(5) 0.21006(3) 0.03122(16) Uani 1 1 d . . .
Br3 Br -0.40980(5) 0.58639(5) 0.03685(3) 0.03159(16) Uani 1 1 d . . .
Cu1 Cu -0.42537(6) 0.16754(6) 0.13900(3) 0.0316(2) Uani 1 1 d . . .
Cu2 Cu -0.55282(6) 0.28220(6) 0.19486(3) 0.0367(2) Uani 1 1 d . . .
Cu3 Cu -0.49135(6) 0.42255(6) 0.04864(3) 0.03004(19) Uani 1 1 d . . .
S1 S -0.32837(12) 0.03340(13) 0.15395(7) 0.0344(4) Uani 1 1 d . . .
S2 S -0.40802(11) 0.26945(11) 0.05731(6) 0.0265(3) Uani 1 1 d . . .
S3 S -0.58189(11) 0.41328(11) 0.13014(6) 0.0271(3) Uani 1 1 d . . .
 
loop_
 _atom_site_aniso_label
 _atom_site_aniso_U_11
 _atom_site_aniso_U_22
 _atom_site_aniso_U_33
 _atom_site_aniso_U_23
 _atom_site_aniso_U_13
 _atom_site_aniso_U_12
C1 0.069(6) 0.026(3) 0.068(6) 0.012(3) -0.007(5) -0.003(4)
C2 0.071(7) 0.029(4) 0.146(10) 0.006(5) -0.038(7) -0.011(4)
C3 0.035(4) 0.038(3) 0.031(3) 0.003(3) -0.005(3) 0.013(3)
C4 0.034(4) 0.054(4) 0.042(4) 0.005(3) -0.002(3) 0.002(4)
C5 0.050(5) 0.033(3) 0.026(3) -0.004(3) -0.009(3) 0.004(3)
C6 0.065(6) 0.034(4) 0.034(4) -0.008(3) -0.004(4) 0.007(4)
C7 0.037(4) 0.039(4) 0.036(4) 0.001(3) 0.000(3) 0.001(3)
C8 0.051(5) 0.052(5) 0.060(5) 0.010(4) 0.025(4) 0.008(4)
C9 0.027(4) 0.045(4) 0.044(4) 0.005(3) -0.002(3) -0.007(3)
C10 0.025(4) 0.047(4) 0.051(4) 0.003(3) 0.001(3) 0.000(3)
C11 0.052(5) 0.035(4) 0.039(4) -0.005(3) 0.012(4) -0.007(4)
C12 0.081(7) 0.038(4) 0.066(6) 0.003(4) 0.011(5) 0.006(4)
Br1 0.0346(4) 0.0352(3) 0.0527(4) -0.0075(3) 0.0038(3) -0.0057(3)
Br2 0.0321(4) 0.0368(3) 0.0247(3) -0.0055(3) 0.0023(3) -0.0039(3)
Br3 0.0369(4) 0.0324(3) 0.0255(3) 0.0021(3) -0.0054(3) -0.0049(3)
Cu1 0.0342(5) 0.0311(4) 0.0295(4) 0.0037(3) -0.0003(3) 0.0032(4)
Cu2 0.0426(5) 0.0362(4) 0.0313(4) 0.0017(3) 0.0035(4) 0.0011(4)
Cu3 0.0347(5) 0.0305(4) 0.0249(4) 0.0021(3) 0.0006(3) 0.0013(4)
S1 0.0384(10) 0.0329(8) 0.0320(9) -0.0022(7) -0.0078(7) 0.0056(8)
S2 0.0303(9) 0.0264(7) 0.0229(7) 0.0012(6) 0.0007(6) 0.0031(7)
S3 0.0320(9) 0.0259(7) 0.0234(7) -0.0003(6) 0.0026(6) -0.0007(7)
 
_geom_special_details
;
 All esds (except the esd in the dihedral angle between two l.s. planes)
 are estimated using the full covariance matrix.  The cell esds are taken
 into account individually in the estimation of esds in distances, angles
 and torsion angles; correlations between esds in cell parameters are only
 used when they are defined by crystal symmetry.  An approximate (isotropic)
 treatment of cell esds is used for estimating esds involving l.s. planes.
;
 
loop_
 _geom_bond_atom_site_label_1
 _geom_bond_atom_site_label_2
 _geom_bond_distance
 _geom_bond_site_symmetry_2
 _geom_bond_publ_flag
C1 C2 1.527(12) . ?
C1 S1 1.813(8) . ?
C1 H1A 0.9900 . ?
C1 H1B 0.9900 . ?
C2 H2A 0.9800 . ?
C2 H2B 0.9800 . ?
C2 H2C 0.9800 . ?
C3 C4 1.508(10) . ?
C3 S1 1.812(7) . ?
C3 H3A 0.9900 . ?
C3 H3B 0.9900 . ?
C4 H4A 0.9800 . ?
C4 H4B 0.9800 . ?
C4 H4C 0.9800 . ?
C5 C6 1.513(9) . ?
C5 S2 1.819(6) . ?
C5 H5A 0.9900 . ?
C5 H5B 0.9900 . ?
C6 H6A 0.9800 . ?
C6 H6B 0.9800 . ?
C6 H6C 0.9800 . ?
C7 C8 1.513(9) . ?
C7 S2 1.818(7) . ?
C7 H7A 0.9900 . ?
C7 H7B 0.9900 . ?
C8 H8A 0.9800 . ?
C8 H8B 0.9800 . ?
C8 H8C 0.9800 . ?
C9 C10 1.494(9) . ?
C9 S3 1.806(7) . ?
C9 H9A 0.9900 . ?
C9 H9B 0.9900 . ?
C10 H10A 0.9800 . ?
C10 H10B 0.9800 . ?
C10 H10C 0.9800 . ?
C11 C12 1.492(10) . ?
C11 S3 1.818(7) . ?
C11 H11A 0.9900 . ?
C11 H11B 0.9900 . ?
C12 H12A 0.9800 . ?
C12 H12B 0.9800 . ?
C12 H12C 0.9800 . ?
Br1 Cu2 2.4144(11) . ?
Br1 Cu1 2.4616(11) . ?
Br2 Cu2 2.4599(10) 4_455 ?
Br2 Cu2 2.5753(11) . ?
Br2 Cu1 2.6091(10) . ?
Br3 Cu3 2.4529(10) . ?
Br3 Cu3 2.4827(10) 5_465 ?
Cu1 S1 2.2776(18) . ?
Cu1 S2 2.3375(17) . ?
Cu1 Cu2 2.7319(12) . ?
Cu2 S3 2.3141(17) . ?
Cu2 Br2 2.4599(10) 4_455 ?
Cu2 Cu2 3.0195(17) 4_455 ?
Cu3 S3 2.3354(17) . ?
Cu3 S2 2.3403(17) . ?
Cu3 Br3 2.4827(10) 5_465 ?
Cu3 Cu3 3.0446(15) 5_465 ?
 
loop_
 _geom_angle_atom_site_label_1
 _geom_angle_atom_site_label_2
 _geom_angle_atom_site_label_3
 _geom_angle
 _geom_angle_site_symmetry_1
 _geom_angle_site_symmetry_3
 _geom_angle_publ_flag
C2 C1 S1 109.6(6) . . ?
C2 C1 H1A 109.8 . . ?
S1 C1 H1A 109.8 . . ?
C2 C1 H1B 109.8 . . ?
S1 C1 H1B 109.8 . . ?
H1A C1 H1B 108.2 . . ?
C1 C2 H2A 109.5 . . ?
C1 C2 H2B 109.5 . . ?
H2A C2 H2B 109.5 . . ?
C1 C2 H2C 109.5 . . ?
H2A C2 H2C 109.5 . . ?
H2B C2 H2C 109.5 . . ?
C4 C3 S1 110.5(5) . . ?
C4 C3 H3A 109.5 . . ?
S1 C3 H3A 109.5 . . ?
C4 C3 H3B 109.5 . . ?
S1 C3 H3B 109.5 . . ?
H3A C3 H3B 108.1 . . ?
C3 C4 H4A 109.5 . . ?
C3 C4 H4B 109.5 . . ?
H4A C4 H4B 109.5 . . ?
C3 C4 H4C 109.5 . . ?
H4A C4 H4C 109.5 . . ?
H4B C4 H4C 109.5 . . ?
C6 C5 S2 113.5(5) . . ?
C6 C5 H5A 108.9 . . ?
S2 C5 H5A 108.9 . . ?
C6 C5 H5B 108.9 . . ?
S2 C5 H5B 108.9 . . ?
H5A C5 H5B 107.7 . . ?
C5 C6 H6A 109.5 . . ?
C5 C6 H6B 109.5 . . ?
H6A C6 H6B 109.5 . . ?
C5 C6 H6C 109.5 . . ?
H6A C6 H6C 109.5 . . ?
H6B C6 H6C 109.5 . . ?
C8 C7 S2 114.4(5) . . ?
C8 C7 H7A 108.7 . . ?
S2 C7 H7A 108.7 . . ?
C8 C7 H7B 108.7 . . ?
S2 C7 H7B 108.7 . . ?
H7A C7 H7B 107.6 . . ?
C7 C8 H8A 109.5 . . ?
C7 C8 H8B 109.5 . . ?
H8A C8 H8B 109.5 . . ?
C7 C8 H8C 109.5 . . ?
H8A C8 H8C 109.5 . . ?
H8B C8 H8C 109.5 . . ?
C10 C9 S3 114.6(5) . . ?
C10 C9 H9A 108.6 . . ?
S3 C9 H9A 108.6 . . ?
C10 C9 H9B 108.6 . . ?
S3 C9 H9B 108.6 . . ?
H9A C9 H9B 107.6 . . ?
C9 C10 H10A 109.5 . . ?
C9 C10 H10B 109.5 . . ?
H10A C10 H10B 109.5 . . ?
C9 C10 H10C 109.5 . . ?
H10A C10 H10C 109.5 . . ?
H10B C10 H10C 109.5 . . ?
C12 C11 S3 114.7(6) . . ?
C12 C11 H11A 108.6 . . ?
S3 C11 H11A 108.6 . . ?
C12 C11 H11B 108.6 . . ?
S3 C11 H11B 108.6 . . ?
H11A C11 H11B 107.6 . . ?
C11 C12 H12A 109.5 . . ?
C11 C12 H12B 109.5 . . ?
H12A C12 H12B 109.5 . . ?
C11 C12 H12C 109.5 . . ?
H12A C12 H12C 109.5 . . ?
H12B C12 H12C 109.5 . . ?
Cu2 Br1 Cu1 68.14(3) . . ?
Cu2 Br2 Cu2 73.65(4) 4_455 . ?
Cu2 Br2 Cu1 110.97(4) 4_455 . ?
Cu2 Br2 Cu1 63.59(3) . . ?
Cu3 Br3 Cu3 76.17(3) . 5_465 ?
S1 Cu1 S2 119.06(7) . . ?
S1 Cu1 Br1 114.05(6) . . ?
S2 Cu1 Br1 108.24(5) . . ?
S1 Cu1 Br2 107.85(5) . . ?
S2 Cu1 Br2 94.81(5) . . ?
Br1 Cu1 Br2 111.14(4) . . ?
S1 Cu1 Cu2 140.72(6) . . ?
S2 Cu1 Cu2 99.34(5) . . ?
Br1 Cu1 Cu2 55.11(3) . . ?
Br2 Cu1 Cu2 57.60(3) . . ?
S3 Cu2 Br1 107.22(5) . . ?
S3 Cu2 Br2 113.25(5) . 4_455 ?
Br1 Cu2 Br2 119.04(4) . 4_455 ?
S3 Cu2 Br2 98.69(5) . . ?
Br1 Cu2 Br2 113.90(4) . . ?
Br2 Cu2 Br2 102.96(4) 4_455 . ?
S3 Cu2 Cu1 102.21(5) . . ?
Br1 Cu2 Cu1 56.75(3) . . ?
Br2 Cu2 Cu1 142.64(4) 4_455 . ?
Br2 Cu2 Cu1 58.81(3) . . ?
S3 Cu2 Cu2 131.06(5) . 4_455 ?
Br1 Cu2 Cu2 119.80(3) . 4_455 ?
Br2 Cu2 Cu2 54.93(3) 4_455 4_455 ?
Br2 Cu2 Cu2 51.42(3) . 4_455 ?
Cu1 Cu2 Cu2 93.03(4) . 4_455 ?
S3 Cu3 S2 100.82(6) . . ?
S3 Cu3 Br3 114.73(5) . . ?
S2 Cu3 Br3 118.74(5) . . ?
S3 Cu3 Br3 108.63(5) . 5_465 ?
S2 Cu3 Br3 109.93(5) . 5_465 ?
Br3 Cu3 Br3 103.83(3) . 5_465 ?
S3 Cu3 Cu3 126.70(6) . 5_465 ?
S2 Cu3 Cu3 131.71(6) . 5_465 ?
Br3 Cu3 Cu3 52.35(3) . 5_465 ?
Br3 Cu3 Cu3 51.47(3) 5_465 5_465 ?
C3 S1 C1 99.0(4) . . ?
C3 S1 Cu1 107.1(2) . . ?
C1 S1 Cu1 106.5(3) . . ?
C7 S2 C5 104.4(3) . . ?
C7 S2 Cu1 104.3(2) . . ?
C5 S2 Cu1 107.4(2) . . ?
C7 S2 Cu3 112.5(2) . . ?
C5 S2 Cu3 107.9(2) . . ?
Cu1 S2 Cu3 119.32(7) . . ?
C9 S3 C11 105.5(4) . . ?
C9 S3 Cu2 108.1(2) . . ?
C11 S3 Cu2 103.9(2) . . ?
C9 S3 Cu3 107.7(2) . . ?
C11 S3 Cu3 113.1(2) . . ?
Cu2 S3 Cu3 117.82(7) . . ?
 
loop_
 _geom_torsion_atom_site_label_1
 _geom_torsion_atom_site_label_2
 _geom_torsion_atom_site_label_3
 _geom_torsion_atom_site_label_4
 _geom_torsion
 _geom_torsion_site_symmetry_1
 _geom_torsion_site_symmetry_2
 _geom_torsion_site_symmetry_3
 _geom_torsion_site_symmetry_4
 _geom_torsion_publ_flag
Cu2 Br1 Cu1 S1 136.23(6) . . . . ?
Cu2 Br1 Cu1 S2 -88.77(5) . . . . ?
Cu2 Br1 Cu1 Br2 14.06(4) . . . . ?
Cu2 Br2 Cu1 S1 -81.15(7) 4_455 . . . ?
Cu2 Br2 Cu1 S1 -139.36(6) . . . . ?
Cu2 Br2 Cu1 S2 156.23(5) 4_455 . . . ?
Cu2 Br2 Cu1 S2 98.02(5) . . . . ?
Cu2 Br2 Cu1 Br1 44.56(5) 4_455 . . . ?
Cu2 Br2 Cu1 Br1 -13.65(4) . . . . ?
Cu2 Br2 Cu1 Cu2 58.21(4) 4_455 . . . ?
Cu1 Br1 Cu2 S3 93.53(6) . . . . ?
Cu1 Br1 Cu2 Br2 -136.32(5) . . . 4_455 ?
Cu1 Br1 Cu2 Br2 -14.54(4) . . . . ?
Cu1 Br1 Cu2 Cu2 -72.39(6) . . . 4_455 ?
Cu2 Br2 Cu2 S3 136.73(4) 4_455 . . . ?
Cu1 Br2 Cu2 S3 -99.07(5) . . . . ?
Cu2 Br2 Cu2 Br1 -109.98(3) 4_455 . . . ?
Cu1 Br2 Cu2 Br1 14.21(4) . . . . ?
Cu2 Br2 Cu2 Br2 20.31(5) 4_455 . . 4_455 ?
Cu1 Br2 Cu2 Br2 144.51(4) . . . 4_455 ?
Cu2 Br2 Cu2 Cu1 -124.20(3) 4_455 . . . ?
Cu1 Br2 Cu2 Cu2 124.20(3) . . . 4_455 ?
S1 Cu1 Cu2 S3 171.16(9) . . . . ?
S2 Cu1 Cu2 S3 3.06(7) . . . . ?
Br1 Cu1 Cu2 S3 -102.73(6) . . . . ?
Br2 Cu1 Cu2 S3 92.84(5) . . . . ?
S1 Cu1 Cu2 Br1 -86.11(9) . . . . ?
S2 Cu1 Cu2 Br1 105.78(5) . . . . ?
Br2 Cu1 Cu2 Br1 -164.43(4) . . . . ?
S1 Cu1 Cu2 Br2 9.49(13) . . . 4_455 ?
S2 Cu1 Cu2 Br2 -158.62(7) . . . 4_455 ?
Br1 Cu1 Cu2 Br2 95.60(7) . . . 4_455 ?
Br2 Cu1 Cu2 Br2 -68.83(7) . . . 4_455 ?
S1 Cu1 Cu2 Br2 78.32(9) . . . . ?
S2 Cu1 Cu2 Br2 -89.79(5) . . . . ?
Br1 Cu1 Cu2 Br2 164.43(4) . . . . ?
S1 Cu1 Cu2 Cu2 37.97(10) . . . 4_455 ?
S2 Cu1 Cu2 Cu2 -130.14(5) . . . 4_455 ?
Br1 Cu1 Cu2 Cu2 124.08(3) . . . 4_455 ?
Br2 Cu1 Cu2 Cu2 -40.35(3) . . . 4_455 ?
Cu3 Br3 Cu3 S3 -118.40(7) 5_465 . . . ?
Cu3 Br3 Cu3 S2 122.37(6) 5_465 . . . ?
Cu3 Br3 Cu3 Br3 0.0 5_465 . . 5_465 ?
C4 C3 S1 C1 173.6(5) . . . . ?
C4 C3 S1 Cu1 -76.0(5) . . . . ?
C2 C1 S1 C3 -169.4(6) . . . . ?
C2 C1 S1 Cu1 79.7(6) . . . . ?
S2 Cu1 S1 C3 105.6(2) . . . . ?
Br1 Cu1 S1 C3 -124.6(2) . . . . ?
Br2 Cu1 S1 C3 -0.7(2) . . . . ?
Cu2 Cu1 S1 C3 -61.0(3) . . . . ?
S2 Cu1 S1 C1 -149.2(3) . . . . ?
Br1 Cu1 S1 C1 -19.4(3) . . . . ?
Br2 Cu1 S1 C1 104.5(3) . . . . ?
Cu2 Cu1 S1 C1 44.2(3) . . . . ?
C8 C7 S2 C5 60.2(6) . . . . ?
C8 C7 S2 Cu1 172.9(5) . . . . ?
C8 C7 S2 Cu3 -56.4(6) . . . . ?
C6 C5 S2 C7 64.6(6) . . . . ?
C6 C5 S2 Cu1 -45.8(6) . . . . ?
C6 C5 S2 Cu3 -175.6(5) . . . . ?
S1 Cu1 S2 C7 -43.7(3) . . . . ?
Br1 Cu1 S2 C7 -176.0(2) . . . . ?
Br2 Cu1 S2 C7 69.8(2) . . . . ?
Cu2 Cu1 S2 C7 127.7(2) . . . . ?
S1 Cu1 S2 C5 66.8(3) . . . . ?
Br1 Cu1 S2 C5 -65.6(3) . . . . ?
Br2 Cu1 S2 C5 -179.7(3) . . . . ?
Cu2 Cu1 S2 C5 -121.8(3) . . . . ?
S1 Cu1 S2 Cu3 -170.20(7) . . . . ?
Br1 Cu1 S2 Cu3 57.42(9) . . . . ?
Br2 Cu1 S2 Cu3 -56.71(8) . . . . ?
Cu2 Cu1 S2 Cu3 1.21(9) . . . . ?
S3 Cu3 S2 C7 -127.5(3) . . . . ?
Br3 Cu3 S2 C7 -1.3(3) . . . . ?
Br3 Cu3 S2 C7 118.0(2) 5_465 . . . ?
Cu3 Cu3 S2 C7 62.4(3) 5_465 . . . ?
S3 Cu3 S2 C5 117.9(3) . . . . ?
Br3 Cu3 S2 C5 -115.9(3) . . . . ?
Br3 Cu3 S2 C5 3.4(3) 5_465 . . . ?
Cu3 Cu3 S2 C5 -52.3(3) 5_465 . . . ?
S3 Cu3 S2 Cu1 -4.89(10) . . . . ?
Br3 Cu3 S2 Cu1 121.31(7) . . . . ?
Br3 Cu3 S2 Cu1 -119.43(7) 5_465 . . . ?
Cu3 Cu3 S2 Cu1 -175.07(6) 5_465 . . . ?
C10 C9 S3 C11 -67.5(6) . . . . ?
C10 C9 S3 Cu2 43.1(6) . . . . ?
C10 C9 S3 Cu3 171.4(5) . . . . ?
C12 C11 S3 C9 -54.3(7) . . . . ?
C12 C11 S3 Cu2 -167.9(6) . . . . ?
C12 C11 S3 Cu3 63.2(7) . . . . ?
Br1 Cu2 S3 C9 56.8(3) . . . . ?
Br2 Cu2 S3 C9 -76.5(3) 4_455 . . . ?
Br2 Cu2 S3 C9 175.3(3) . . . . ?
Cu1 Cu2 S3 C9 115.5(3) . . . . ?
Cu2 Cu2 S3 C9 -139.5(3) 4_455 . . . ?
Br1 Cu2 S3 C11 168.6(3) . . . . ?
Br2 Cu2 S3 C11 35.2(3) 4_455 . . . ?
Br2 Cu2 S3 C11 -73.0(3) . . . . ?
Cu1 Cu2 S3 C11 -132.8(3) . . . . ?
Cu2 Cu2 S3 C11 -27.7(3) 4_455 . . . ?
Br1 Cu2 S3 Cu3 -65.44(9) . . . . ?
Br2 Cu2 S3 Cu3 161.23(6) 4_455 . . . ?
Br2 Cu2 S3 Cu3 53.02(8) . . . . ?
Cu1 Cu2 S3 Cu3 -6.78(9) . . . . ?
Cu2 Cu2 S3 Cu3 98.30(9) 4_455 . . . ?
S2 Cu3 S3 C9 -115.1(3) . . . . ?
Br3 Cu3 S3 C9 116.1(3) . . . . ?
Br3 Cu3 S3 C9 0.4(3) 5_465 . . . ?
Cu3 Cu3 S3 C9 55.8(3) 5_465 . . . ?
S2 Cu3 S3 C11 128.7(3) . . . . ?
Br3 Cu3 S3 C11 -0.1(3) . . . . ?
Br3 Cu3 S3 C11 -115.8(3) 5_465 . . . ?
Cu3 Cu3 S3 C11 -60.4(3) 5_465 . . . ?
S2 Cu3 S3 Cu2 7.37(9) . . . . ?
Br3 Cu3 S3 Cu2 -121.46(7) . . . . ?
Br3 Cu3 S3 Cu2 122.88(7) 5_465 . . . ?
Cu3 Cu3 S3 Cu2 178.23(6) 5_465 . . . ?
 
_diffrn_measured_fraction_theta_max    0.999
_diffrn_reflns_theta_full              27.48
_diffrn_measured_fraction_theta_full   0.999
_refine_diff_density_max    0.627
_refine_diff_density_min   -0.895
_refine_diff_density_rms    0.166
#===END

data_cubr235k

_audit_creation_method            SHELXL-97
_chemical_name_systematic
;
 ?
;
_chemical_name_common             ?
_chemical_melting_point           ?
_chemical_formula_moiety          
 'C12 H30 Br3 Cu3 S3'
_chemical_formula_sum
 'C12 H30 Br3 Cu3 S3'
_chemical_formula_weight          700.89
 
loop_
 _atom_type_symbol
 _atom_type_description
 _atom_type_scat_dispersion_real
 _atom_type_scat_dispersion_imag
 _atom_type_scat_source
 'C'  'C'   0.0033   0.0016
 'International Tables Vol C Tables 4.2.6.8 and 6.1.1.4'
 'H'  'H'   0.0000   0.0000
 'International Tables Vol C Tables 4.2.6.8 and 6.1.1.4'
 'Br'  'Br'  -0.2901   2.4595
 'International Tables Vol C Tables 4.2.6.8 and 6.1.1.4'
 'Cu'  'Cu'   0.3201   1.2651
 'International Tables Vol C Tables 4.2.6.8 and 6.1.1.4'
 'S'  'S'   0.1246   0.1234
 'International Tables Vol C Tables 4.2.6.8 and 6.1.1.4'
 
_symmetry_cell_setting            orthorhombic
_symmetry_space_group_name_H-M    'P b c n'
_symmetry_space_group_name_hall   '-P 2n 2ab '
 
loop_
 _symmetry_equiv_pos_as_xyz
 'x, y, z'
 '-x+1/2, -y+1/2, z+1/2'
 'x+1/2, -y+1/2, -z'
 '-x, y, -z+1/2'
 '-x, -y, -z'
 'x-1/2, y-1/2, -z-1/2'
 '-x-1/2, y-1/2, z'
 'x, -y, z-1/2'

_cell_length_a                    14.9267(3)
_cell_length_b                    12.8977(2)
_cell_length_c                    23.5086(4)
_cell_angle_alpha                 90.00
_cell_angle_beta                  90.00
_cell_angle_gamma                 90.00
_cell_volume                      4525.88(14)
_cell_formula_units_Z             8
_cell_measurement_temperature     235(2)
_cell_measurement_reflns_used     5639
_cell_measurement_theta_min        0.998
_cell_measurement_theta_max        27.485
 
_exptl_crystal_description        Prism
_exptl_crystal_colour             colourless
_exptl_crystal_size_max           0.22
_exptl_crystal_size_mid           0.20
_exptl_crystal_size_min           0.12
_exptl_crystal_density_meas       ?
_exptl_crystal_density_diffrn     2.057
_exptl_crystal_density_method     'not measured'
_exptl_crystal_F_000              2736
_exptl_absorpt_coefficient_mu     8.360
_exptl_absorpt_correction_type    multi-scan
_exptl_absorpt_process_details
;
[c.f. r.h. blessing, acta cryst. (1995), a51, 33-38]
;
_exptl_absorpt_correction_T_min   0.1256
_exptl_absorpt_correction_T_max   0.2940

_exptl_special_details
;
 ?
;
 
_diffrn_ambient_temperature       235(2)
_diffrn_radiation_wavelength      0.71073
_diffrn_radiation_type            MoK\a
_diffrn_radiation_source          'fine-focus sealed tube'
_diffrn_radiation_monochromator   graphite
_diffrn_measurement_device_type   'Nonius Kappa APEX-II'
_diffrn_measurement_method        CCD
_diffrn_detector_area_resol_mean  ?
_diffrn_standards_number          ?
_diffrn_standards_interval_count  ?
_diffrn_standards_interval_time   ?
_diffrn_standards_decay_%         ?
_diffrn_reflns_number             36080
_diffrn_reflns_av_R_equivalents   0.0668
_diffrn_reflns_av_sigmaI/netI     0.0344
_diffrn_reflns_limit_h_min        -19
_diffrn_reflns_limit_h_max        17
_diffrn_reflns_limit_k_min        -16
_diffrn_reflns_limit_k_max        16
_diffrn_reflns_limit_l_min        -30
_diffrn_reflns_limit_l_max        28
_diffrn_reflns_theta_min          1.73
_diffrn_reflns_theta_max          27.46
_reflns_number_total              5168
_reflns_number_gt                 4014
_reflns_threshold_expression      >2sigma(I)
 
_computing_data_collection        'Collect (Bruker AXS BV, 1997-2004)'
_computing_cell_refinement        'HKL Scalepack (Otwinowski & Minor 1997)'
_computing_data_reduction         
'HKL Denzo and Scalepack (Otwinowski & Minor 1997)'
_computing_structure_solution     'SIR92 (Altomare et al., 1993)'
_computing_structure_refinement   'SHELXL-97 (Sheldrick, 1997)'
_computing_molecular_graphics     'ORTEP3 (Farrugia,1997)'
_computing_publication_material   
'WinGX publication routines (Farrugia, 1999)'
 
_refine_special_details
;
 Refinement of F^2^ against ALL reflections.  The weighted R-factor wR and
 goodness of fit S are based on F^2^, conventional R-factors R are based
 on F, with F set to zero for negative F^2^. The threshold expression of
 F^2^ > 2sigma(F^2^) is used only for calculating R-factors(gt) etc. and is
 not relevant to the choice of reflections for refinement.  R-factors based
 on F^2^ are statistically about twice as large as those based on F, and R-
 factors based on ALL data will be even larger.
;
 
_refine_ls_structure_factor_coef  Fsqd
_refine_ls_matrix_type            full
_refine_ls_weighting_scheme       calc
_refine_ls_weighting_details
 'calc w=1/[\s^2^(Fo^2^)+(0.0171P)^2^+14.1514P] where P=(Fo^2^+2Fc^2^)/3'
_atom_sites_solution_primary      direct
_atom_sites_solution_secondary    difmap
_atom_sites_solution_hydrogens    geom
_refine_ls_hydrogen_treatment     noref
_refine_ls_extinction_method      none
_refine_ls_extinction_coef        ?
_refine_ls_number_reflns          5168
_refine_ls_number_parameters      196
_refine_ls_number_restraints      0
_refine_ls_number_constraints   0
_refine_ls_R_factor_all           0.0624
_refine_ls_R_factor_gt            0.0409
_refine_ls_wR_factor_ref          0.0828
_refine_ls_wR_factor_gt           0.0737
_refine_ls_goodness_of_fit_ref    1.113
_refine_ls_restrained_S_all       1.113
_refine_ls_shift/su_max           0.001
_refine_ls_shift/su_mean          0.000
 
loop_
 _atom_site_label
 _atom_site_type_symbol
 _atom_site_fract_x
 _atom_site_fract_y
 _atom_site_fract_z
 _atom_site_U_iso_or_equiv
 _atom_site_adp_type
 _atom_site_occupancy
 _atom_site_symmetry_multiplicity
 _atom_site_calc_flag
 _atom_site_refinement_flags
 _atom_site_disorder_assembly
 _atom_site_disorder_group
Br1 Br -0.58555(4) 0.12311(4) 0.14804(3) 0.05323(15) Uani 1 1 d . . .
Br2 Br -0.38444(3) 0.31828(4) 0.20998(2) 0.04104(13) Uani 1 1 d . . .
Br3 Br -0.41125(4) 0.58736(4) 0.03748(2) 0.04067(13) Uani 1 1 d . . .
Cu1 Cu -0.42609(4) 0.16910(5) 0.13973(3) 0.04209(16) Uani 1 1 d . . .
Cu2 Cu -0.55321(5) 0.28596(5) 0.19494(3) 0.04914(18) Uani 1 1 d . . .
Cu3 Cu -0.49246(4) 0.42326(5) 0.04856(2) 0.03896(15) Uani 1 1 d . . .
S1 S -0.33006(10) 0.03446(10) 0.15469(6) 0.0477(3) Uani 1 1 d . . .
S2 S -0.40894(8) 0.27006(9) 0.05785(5) 0.0341(3) Uani 1 1 d . . .
S3 S -0.58395(9) 0.41490(9) 0.12930(5) 0.0369(3) Uani 1 1 d . . .
C1 C -0.3931(5) -0.0625(5) 0.1934(3) 0.074(2) Uani 1 1 d . . .
H1A H -0.3517 -0.1090 0.2133 0.088 Uiso 1 1 calc R . .
H1B H -0.4310 -0.0285 0.2219 0.088 Uiso 1 1 calc R . .
C2 C -0.4509(6) -0.1246(6) 0.1533(4) 0.113(4) Uani 1 1 d . . .
H2A H -0.4912 -0.0784 0.1332 0.170 Uiso 1 1 calc R . .
H2B H -0.4855 -0.1747 0.1748 0.170 Uiso 1 1 calc R . .
H2C H -0.4132 -0.1606 0.1261 0.170 Uiso 1 1 calc R . .
C3 C -0.2533(4) 0.0745(4) 0.2106(2) 0.0483(13) Uani 1 1 d . . .
H3A H -0.2871 0.1076 0.2414 0.058 Uiso 1 1 calc R . .
H3B H -0.2229 0.0135 0.2262 0.058 Uiso 1 1 calc R . .
C4 C -0.1851(4) 0.1489(5) 0.1879(2) 0.0603(16) Uani 1 1 d . . .
H4A H -0.1527 0.1167 0.1568 0.090 Uiso 1 1 calc R . .
H4B H -0.1434 0.1674 0.2179 0.090 Uiso 1 1 calc R . .
H4C H -0.2150 0.2109 0.1742 0.090 Uiso 1 1 calc R . .
C5 C -0.4347(4) 0.1880(4) -0.0029(2) 0.0511(14) Uani 1 1 d . . .
H5A H -0.4998 0.1784 -0.0049 0.061 Uiso 1 1 calc R . .
H5B H -0.4158 0.2237 -0.0377 0.061 Uiso 1 1 calc R . .
C6 C -0.3909(5) 0.0834(4) -0.0011(2) 0.0615(17) Uani 1 1 d . . .
H6A H -0.3267 0.0918 0.0032 0.092 Uiso 1 1 calc R . .
H6B H -0.4034 0.0466 -0.0362 0.092 Uiso 1 1 calc R . .
H6C H -0.4143 0.0442 0.0308 0.092 Uiso 1 1 calc R . .
C7 C -0.2889(4) 0.2932(5) 0.0532(2) 0.0519(14) Uani 1 1 d . . .
H7A H -0.2705 0.3351 0.0860 0.062 Uiso 1 1 calc R . .
H7B H -0.2577 0.2265 0.0558 0.062 Uiso 1 1 calc R . .
C8 C -0.2594(5) 0.3472(5) -0.0003(3) 0.0712(19) Uani 1 1 d . . .
H8A H -0.2734 0.3041 -0.0329 0.107 Uiso 1 1 calc R . .
H8B H -0.1953 0.3594 0.0012 0.107 Uiso 1 1 calc R . .
H8C H -0.2905 0.4130 -0.0036 0.107 Uiso 1 1 calc R . .
C9 C -0.6977(4) 0.3977(5) 0.1060(2) 0.0559(15) Uani 1 1 d . . .
H9A H -0.7163 0.4603 0.0855 0.067 Uiso 1 1 calc R . .
H9B H -0.6994 0.3399 0.0790 0.067 Uiso 1 1 calc R . .
C10 C -0.7643(4) 0.3769(5) 0.1520(3) 0.0645(17) Uani 1 1 d . . .
H10A H -0.7456 0.3168 0.1738 0.097 Uiso 1 1 calc R . .
H10B H -0.8226 0.3637 0.1352 0.097 Uiso 1 1 calc R . .
H10C H -0.7682 0.4367 0.1769 0.097 Uiso 1 1 calc R . .
C11 C -0.5794(5) 0.5345(5) 0.1720(3) 0.076(2) Uani 1 1 d . . .
H11A H -0.6136 0.5235 0.2071 0.091 Uiso 1 1 calc R . .
H11B H -0.5170 0.5473 0.1829 0.091 Uiso 1 1 calc R . .
C12 C -0.6128(6) 0.6237(6) 0.1447(4) 0.100(3) Uani 1 1 d . . .
H12A H -0.5820 0.6333 0.1087 0.150 Uiso 1 1 calc R . .
H12B H -0.6030 0.6838 0.1687 0.150 Uiso 1 1 calc R . .
H12C H -0.6765 0.6155 0.1378 0.150 Uiso 1 1 calc R . .
 
loop_
 _atom_site_aniso_label
 _atom_site_aniso_U_11
 _atom_site_aniso_U_22
 _atom_site_aniso_U_33
 _atom_site_aniso_U_23
 _atom_site_aniso_U_13
 _atom_site_aniso_U_12
Br1 0.0459(3) 0.0464(3) 0.0674(4) -0.0071(3) 0.0048(3) -0.0088(3)
Br2 0.0416(3) 0.0495(3) 0.0320(2) -0.0071(2) 0.0023(2) -0.0058(2)
Br3 0.0465(3) 0.0415(3) 0.0341(2) 0.0033(2) -0.0069(2) -0.0066(2)
Cu1 0.0450(4) 0.0414(3) 0.0399(3) 0.0057(3) -0.0006(3) 0.0032(3)
Cu2 0.0550(4) 0.0537(4) 0.0387(3) 0.0028(3) 0.0035(3) -0.0007(3)
Cu3 0.0449(4) 0.0392(3) 0.0329(3) 0.0031(2) 0.0004(3) 0.0009(3)
S1 0.0557(9) 0.0433(7) 0.0441(7) -0.0011(6) -0.0092(6) 0.0103(6)
S2 0.0391(7) 0.0332(6) 0.0300(5) 0.0017(4) 0.0001(5) 0.0035(5)
S3 0.0460(7) 0.0340(6) 0.0306(6) -0.0005(5) 0.0060(5) -0.0026(5)
C1 0.079(5) 0.042(3) 0.099(5) 0.019(3) -0.018(4) -0.004(3)
C2 0.095(6) 0.051(4) 0.195(10) 0.007(5) -0.061(7) -0.005(4)
C3 0.054(3) 0.050(3) 0.041(3) 0.004(3) -0.009(3) 0.011(3)
C4 0.050(4) 0.079(4) 0.052(3) 0.005(3) -0.002(3) 0.003(3)
C5 0.074(4) 0.045(3) 0.034(3) -0.009(2) -0.011(3) 0.007(3)
C6 0.089(5) 0.050(3) 0.046(3) -0.007(3) -0.002(3) 0.011(3)
C7 0.041(3) 0.058(3) 0.057(3) 0.007(3) 0.009(3) 0.005(3)
C8 0.071(5) 0.065(4) 0.077(4) 0.015(4) 0.029(4) 0.003(3)
C9 0.046(3) 0.079(4) 0.043(3) 0.010(3) -0.003(3) -0.002(3)
C10 0.047(4) 0.077(4) 0.070(4) 0.010(3) 0.009(3) 0.003(3)
C11 0.106(6) 0.049(3) 0.071(4) -0.004(3) 0.047(4) 0.001(4)
C12 0.131(8) 0.070(5) 0.099(6) 0.006(4) 0.041(6) 0.016(5)
 
_geom_special_details
;
 All esds (except the esd in the dihedral angle between two l.s. planes)
 are estimated using the full covariance matrix.  The cell esds are taken
 into account individually in the estimation of esds in distances, angles
 and torsion angles; correlations between esds in cell parameters are only
 used when they are defined by crystal symmetry.  An approximate (isotropic)
 treatment of cell esds is used for estimating esds involving l.s. planes.
;
 
loop_
 _geom_bond_atom_site_label_1
 _geom_bond_atom_site_label_2
 _geom_bond_distance
 _geom_bond_site_symmetry_2
 _geom_bond_publ_flag
Br1 Cu2 2.4209(9) . ?
Br1 Cu1 2.4607(9) . ?
Br2 Cu2 2.4567(8) 4_455 ?
Br2 Cu2 2.5778(9) . ?
Br2 Cu1 2.6108(8) . ?
Br3 Cu3 2.4530(8) . ?
Br3 Cu3 2.4851(8) 5_465 ?
Cu1 S1 2.2791(14) . ?
Cu1 S2 2.3380(13) . ?
Cu1 Cu2 2.7489(9) . ?
Cu2 S3 2.3145(14) . ?
Cu2 Br2 2.4567(8) 4_455 ?
Cu2 Cu2 3.0373(13) 4_455 ?
Cu3 S3 2.3409(13) . ?
Cu3 S2 2.3464(13) . ?
Cu3 Br3 2.4851(8) 5_465 ?
Cu3 Cu3 3.0302(11) 5_465 ?
S1 C1 1.810(6) . ?
S1 C3 1.819(5) . ?
S2 C5 1.818(5) . ?
S2 C7 1.820(6) . ?
S3 C9 1.798(6) . ?
S3 C11 1.842(6) . ?
C1 C2 1.509(9) . ?
C1 H1A 0.9800 . ?
C1 H1B 0.9800 . ?
C2 H2A 0.9700 . ?
C2 H2B 0.9700 . ?
C2 H2C 0.9700 . ?
C3 C4 1.498(8) . ?
C3 H3A 0.9800 . ?
C3 H3B 0.9800 . ?
C4 H4A 0.9700 . ?
C4 H4B 0.9700 . ?
C4 H4C 0.9700 . ?
C5 C6 1.499(7) . ?
C5 H5A 0.9800 . ?
C5 H5B 0.9800 . ?
C6 H6A 0.9700 . ?
C6 H6B 0.9700 . ?
C6 H6C 0.9700 . ?
C7 C8 1.504(7) . ?
C7 H7A 0.9800 . ?
C7 H7B 0.9800 . ?
C8 H8A 0.9700 . ?
C8 H8B 0.9700 . ?
C8 H8C 0.9700 . ?
C9 C10 1.494(8) . ?
C9 H9A 0.9800 . ?
C9 H9B 0.9800 . ?
C10 H10A 0.9700 . ?
C10 H10B 0.9700 . ?
C10 H10C 0.9700 . ?
C11 C12 1.410(9) . ?
C11 H11A 0.9800 . ?
C11 H11B 0.9800 . ?
C12 H12A 0.9700 . ?
C12 H12B 0.9700 . ?
C12 H12C 0.9700 . ?
 
loop_
 _geom_angle_atom_site_label_1
 _geom_angle_atom_site_label_2
 _geom_angle_atom_site_label_3
 _geom_angle
 _geom_angle_site_symmetry_1
 _geom_angle_site_symmetry_3
 _geom_angle_publ_flag
Cu2 Br1 Cu1 68.54(3) . . ?
Cu2 Br2 Cu2 74.17(3) 4_455 . ?
Cu2 Br2 Cu1 111.12(3) 4_455 . ?
Cu2 Br2 Cu1 63.98(2) . . ?
Cu3 Br3 Cu3 75.70(2) . 5_465 ?
S1 Cu1 S2 118.85(5) . . ?
S1 Cu1 Br1 114.36(5) . . ?
S2 Cu1 Br1 107.79(4) . . ?
S1 Cu1 Br2 108.31(4) . . ?
S2 Cu1 Br2 94.84(4) . . ?
Br1 Cu1 Br2 110.96(3) . . ?
S1 Cu1 Cu2 141.17(5) . . ?
S2 Cu1 Cu2 99.15(4) . . ?
Br1 Cu1 Cu2 55.04(2) . . ?
Br2 Cu1 Cu2 57.43(2) . . ?
S3 Cu2 Br1 106.27(4) . . ?
S3 Cu2 Br2 114.18(4) . 4_455 ?
Br1 Cu2 Br2 119.08(3) . 4_455 ?
S3 Cu2 Br2 99.73(4) . . ?
Br1 Cu2 Br2 113.43(3) . . ?
Br2 Cu2 Br2 102.59(3) 4_455 . ?
S3 Cu2 Cu1 102.48(4) . . ?
Br1 Cu2 Cu1 56.42(2) . . ?
Br2 Cu2 Cu1 141.63(3) 4_455 . ?
Br2 Cu2 Cu1 58.59(2) . . ?
S3 Cu2 Cu2 132.22(4) . 4_455 ?
Br1 Cu2 Cu2 119.50(2) . 4_455 ?
Br2 Cu2 Cu2 54.74(2) 4_455 4_455 ?
Br2 Cu2 Cu2 51.09(2) . 4_455 ?
Cu1 Cu2 Cu2 92.37(3) . 4_455 ?
S3 Cu3 S2 101.29(5) . . ?
S3 Cu3 Br3 114.47(4) . . ?
S2 Cu3 Br3 118.29(4) . . ?
S3 Cu3 Br3 108.66(4) . 5_465 ?
S2 Cu3 Br3 109.67(4) . 5_465 ?
Br3 Cu3 Br3 104.30(2) . 5_465 ?
S3 Cu3 Cu3 126.70(5) . 5_465 ?
S2 Cu3 Cu3 131.28(4) . 5_465 ?
Br3 Cu3 Cu3 52.63(2) . 5_465 ?
Br3 Cu3 Cu3 51.67(2) 5_465 5_465 ?
C1 S1 C3 99.2(3) . . ?
C1 S1 Cu1 106.1(2) . . ?
C3 S1 Cu1 106.93(18) . . ?
C5 S2 C7 104.9(3) . . ?
C5 S2 Cu1 107.38(18) . . ?
C7 S2 Cu1 104.37(18) . . ?
C5 S2 Cu3 107.76(18) . . ?
C7 S2 Cu3 112.30(19) . . ?
Cu1 S2 Cu3 119.17(5) . . ?
C9 S3 C11 107.7(3) . . ?
C9 S3 Cu2 107.6(2) . . ?
C11 S3 Cu2 103.3(2) . . ?
C9 S3 Cu3 108.03(18) . . ?
C11 S3 Cu3 112.5(2) . . ?
Cu2 S3 Cu3 117.26(6) . . ?
C2 C1 S1 110.5(6) . . ?
C2 C1 H1A 109.6 . . ?
S1 C1 H1A 109.6 . . ?
C2 C1 H1B 109.6 . . ?
S1 C1 H1B 109.6 . . ?
H1A C1 H1B 108.1 . . ?
C1 C2 H2A 109.5 . . ?
C1 C2 H2B 109.5 . . ?
H2A C2 H2B 109.5 . . ?
C1 C2 H2C 109.5 . . ?
H2A C2 H2C 109.5 . . ?
H2B C2 H2C 109.5 . . ?
C4 C3 S1 110.6(4) . . ?
C4 C3 H3A 109.5 . . ?
S1 C3 H3A 109.5 . . ?
C4 C3 H3B 109.5 . . ?
S1 C3 H3B 109.5 . . ?
H3A C3 H3B 108.1 . . ?
C3 C4 H4A 109.5 . . ?
C3 C4 H4B 109.5 . . ?
H4A C4 H4B 109.5 . . ?
C3 C4 H4C 109.5 . . ?
H4A C4 H4C 109.5 . . ?
H4B C4 H4C 109.5 . . ?
C6 C5 S2 114.2(4) . . ?
C6 C5 H5A 108.7 . . ?
S2 C5 H5A 108.7 . . ?
C6 C5 H5B 108.7 . . ?
S2 C5 H5B 108.7 . . ?
H5A C5 H5B 107.6 . . ?
C5 C6 H6A 109.5 . . ?
C5 C6 H6B 109.5 . . ?
H6A C6 H6B 109.5 . . ?
C5 C6 H6C 109.5 . . ?
H6A C6 H6C 109.5 . . ?
H6B C6 H6C 109.5 . . ?
C8 C7 S2 114.5(4) . . ?
C8 C7 H7A 108.6 . . ?
S2 C7 H7A 108.6 . . ?
C8 C7 H7B 108.6 . . ?
S2 C7 H7B 108.6 . . ?
H7A C7 H7B 107.6 . . ?
C7 C8 H8A 109.5 . . ?
C7 C8 H8B 109.5 . . ?
H8A C8 H8B 109.5 . . ?
C7 C8 H8C 109.5 . . ?
H8A C8 H8C 109.5 . . ?
H8B C8 H8C 109.5 . . ?
C10 C9 S3 115.5(4) . . ?
C10 C9 H9A 108.4 . . ?
S3 C9 H9A 108.4 . . ?
C10 C9 H9B 108.4 . . ?
S3 C9 H9B 108.4 . . ?
H9A C9 H9B 107.5 . . ?
C9 C10 H10A 109.5 . . ?
C9 C10 H10B 109.5 . . ?
H10A C10 H10B 109.5 . . ?
C9 C10 H10C 109.5 . . ?
H10A C10 H10C 109.5 . . ?
H10B C10 H10C 109.5 . . ?
C12 C11 S3 115.0(6) . . ?
C12 C11 H11A 108.5 . . ?
S3 C11 H11A 108.5 . . ?
C12 C11 H11B 108.5 . . ?
S3 C11 H11B 108.5 . . ?
H11A C11 H11B 107.5 . . ?
C11 C12 H12A 109.5 . . ?
C11 C12 H12B 109.5 . . ?
H12A C12 H12B 109.5 . . ?
C11 C12 H12C 109.5 . . ?
H12A C12 H12C 109.5 . . ?
H12B C12 H12C 109.5 . . ?
 
loop_
 _geom_torsion_atom_site_label_1
 _geom_torsion_atom_site_label_2
 _geom_torsion_atom_site_label_3
 _geom_torsion_atom_site_label_4
 _geom_torsion
 _geom_torsion_site_symmetry_1
 _geom_torsion_site_symmetry_2
 _geom_torsion_site_symmetry_3
 _geom_torsion_site_symmetry_4
 _geom_torsion_publ_flag
Cu2 Br1 Cu1 S1 136.63(5) . . . . ?
Cu2 Br1 Cu1 S2 -88.82(4) . . . . ?
Cu2 Br1 Cu1 Br2 13.76(3) . . . . ?
Cu2 Br2 Cu1 S1 -80.60(5) 4_455 . . . ?
Cu2 Br2 Cu1 S1 -139.67(5) . . . . ?
Cu2 Br2 Cu1 S2 156.84(4) 4_455 . . . ?
Cu2 Br2 Cu1 S2 97.77(4) . . . . ?
Cu2 Br2 Cu1 Br1 45.70(4) 4_455 . . . ?
Cu2 Br2 Cu1 Br1 -13.38(3) . . . . ?
Cu2 Br2 Cu1 Cu2 59.07(3) 4_455 . . . ?
Cu1 Br1 Cu2 S3 94.38(4) . . . . ?
Cu1 Br1 Cu2 Br2 -135.04(4) . . . 4_455 ?
Cu1 Br1 Cu2 Br2 -14.19(3) . . . . ?
Cu1 Br1 Cu2 Cu2 -71.42(4) . . . 4_455 ?
Cu2 Br2 Cu2 S3 137.53(3) 4_455 . . . ?
Cu1 Br2 Cu2 S3 -98.75(4) . . . . ?
Cu2 Br2 Cu2 Br1 -109.88(3) 4_455 . . . ?
Cu1 Br2 Cu2 Br1 13.85(3) . . . . ?
Cu2 Br2 Cu2 Br2 19.88(4) 4_455 . . 4_455 ?
Cu1 Br2 Cu2 Br2 143.60(3) . . . 4_455 ?
Cu2 Br2 Cu2 Cu1 -123.72(2) 4_455 . . . ?
Cu1 Br2 Cu2 Cu2 123.72(2) . . . 4_455 ?
S1 Cu1 Cu2 S3 172.39(8) . . . . ?
S2 Cu1 Cu2 S3 3.97(5) . . . . ?
Br1 Cu1 Cu2 S3 -101.40(4) . . . . ?
Br2 Cu1 Cu2 S3 93.89(4) . . . . ?
S1 Cu1 Cu2 Br1 -86.22(8) . . . . ?
S2 Cu1 Cu2 Br1 105.37(4) . . . . ?
Br2 Cu1 Cu2 Br1 -164.72(3) . . . . ?
S1 Cu1 Cu2 Br2 9.59(11) . . . 4_455 ?
S2 Cu1 Cu2 Br2 -158.82(6) . . . 4_455 ?
Br1 Cu1 Cu2 Br2 95.81(6) . . . 4_455 ?
Br2 Cu1 Cu2 Br2 -68.91(5) . . . 4_455 ?
S1 Cu1 Cu2 Br2 78.50(8) . . . . ?
S2 Cu1 Cu2 Br2 -89.91(4) . . . . ?
Br1 Cu1 Cu2 Br2 164.72(3) . . . . ?
S1 Cu1 Cu2 Cu2 38.13(8) . . . 4_455 ?
S2 Cu1 Cu2 Cu2 -130.29(4) . . . 4_455 ?
Br1 Cu1 Cu2 Cu2 124.34(3) . . . 4_455 ?
Br2 Cu1 Cu2 Cu2 -40.37(2) . . . 4_455 ?
Cu3 Br3 Cu3 S3 -118.60(5) 5_465 . . . ?
Cu3 Br3 Cu3 S2 122.12(5) 5_465 . . . ?
Cu3 Br3 Cu3 Br3 0.0 5_465 . . 5_465 ?
S2 Cu1 S1 C1 -149.1(2) . . . . ?
Br1 Cu1 S1 C1 -19.8(2) . . . . ?
Br2 Cu1 S1 C1 104.5(2) . . . . ?
Cu2 Cu1 S1 C1 44.0(3) . . . . ?
S2 Cu1 S1 C3 105.7(2) . . . . ?
Br1 Cu1 S1 C3 -125.04(19) . . . . ?
Br2 Cu1 S1 C3 -0.7(2) . . . . ?
Cu2 Cu1 S1 C3 -61.2(2) . . . . ?
S1 Cu1 S2 C5 66.5(2) . . . . ?
Br1 Cu1 S2 C5 -65.7(2) . . . . ?
Br2 Cu1 S2 C5 -179.6(2) . . . . ?
Cu2 Cu1 S2 C5 -121.8(2) . . . . ?
S1 Cu1 S2 C7 -44.5(2) . . . . ?
Br1 Cu1 S2 C7 -176.7(2) . . . . ?
Br2 Cu1 S2 C7 69.5(2) . . . . ?
Cu2 Cu1 S2 C7 127.2(2) . . . . ?
S1 Cu1 S2 Cu3 -170.80(6) . . . . ?
Br1 Cu1 S2 Cu3 57.03(7) . . . . ?
Br2 Cu1 S2 Cu3 -56.81(6) . . . . ?
Cu2 Cu1 S2 Cu3 0.94(6) . . . . ?
S3 Cu3 S2 C5 117.2(2) . . . . ?
Br3 Cu3 S2 C5 -116.9(2) . . . . ?
Br3 Cu3 S2 C5 2.5(2) 5_465 . . . ?
Cu3 Cu3 S2 C5 -53.3(2) 5_465 . . . ?
S3 Cu3 S2 C7 -127.8(2) . . . . ?
Br3 Cu3 S2 C7 -1.8(2) . . . . ?
Br3 Cu3 S2 C7 117.5(2) 5_465 . . . ?
Cu3 Cu3 S2 C7 61.7(2) 5_465 . . . ?
S3 Cu3 S2 Cu1 -5.37(7) . . . . ?
Br3 Cu3 S2 Cu1 120.57(5) . . . . ?
Br3 Cu3 S2 Cu1 -120.07(5) 5_465 . . . ?
Cu3 Cu3 S2 Cu1 -175.84(5) 5_465 . . . ?
Br1 Cu2 S3 C9 55.5(2) . . . . ?
Br2 Cu2 S3 C9 -77.8(2) 4_455 . . . ?
Br2 Cu2 S3 C9 173.5(2) . . . . ?
Cu1 Cu2 S3 C9 113.8(2) . . . . ?
Cu2 Cu2 S3 C9 -141.3(2) 4_455 . . . ?
Br1 Cu2 S3 C11 169.2(2) . . . . ?
Br2 Cu2 S3 C11 35.9(2) 4_455 . . . ?
Br2 Cu2 S3 C11 -72.7(2) . . . . ?
Cu1 Cu2 S3 C11 -132.5(2) . . . . ?
Cu2 Cu2 S3 C11 -27.5(3) 4_455 . . . ?
Br1 Cu2 S3 Cu3 -66.42(6) . . . . ?
Br2 Cu2 S3 Cu3 160.26(5) 4_455 . . . ?
Br2 Cu2 S3 Cu3 51.64(6) . . . . ?
Cu1 Cu2 S3 Cu3 -8.13(7) . . . . ?
Cu2 Cu2 S3 Cu3 96.83(7) 4_455 . . . ?
S2 Cu3 S3 C9 -113.1(2) . . . . ?
Br3 Cu3 S3 C9 118.5(2) . . . . ?
Br3 Cu3 S3 C9 2.4(2) 5_465 . . . ?
Cu3 Cu3 S3 C9 58.0(2) 5_465 . . . ?
S2 Cu3 S3 C11 128.2(3) . . . . ?
Br3 Cu3 S3 C11 -0.3(3) . . . . ?
Br3 Cu3 S3 C11 -116.4(3) 5_465 . . . ?
Cu3 Cu3 S3 C11 -60.8(3) 5_465 . . . ?
S2 Cu3 S3 Cu2 8.57(7) . . . . ?
Br3 Cu3 S3 Cu2 -119.88(5) . . . . ?
Br3 Cu3 S3 Cu2 124.02(5) 5_465 . . . ?
Cu3 Cu3 S3 Cu2 179.63(5) 5_465 . . . ?
C3 S1 C1 C2 -168.8(5) . . . . ?
Cu1 S1 C1 C2 80.5(5) . . . . ?
C1 S1 C3 C4 174.1(4) . . . . ?
Cu1 S1 C3 C4 -75.9(4) . . . . ?
C7 S2 C5 C6 64.1(5) . . . . ?
Cu1 S2 C5 C6 -46.6(5) . . . . ?
Cu3 S2 C5 C6 -176.1(4) . . . . ?
C5 S2 C7 C8 60.6(5) . . . . ?
Cu1 S2 C7 C8 173.4(4) . . . . ?
Cu3 S2 C7 C8 -56.1(5) . . . . ?
C11 S3 C9 C10 -65.9(5) . . . . ?
Cu2 S3 C9 C10 44.9(5) . . . . ?
Cu3 S3 C9 C10 172.3(4) . . . . ?
C9 S3 C11 C12 -54.6(6) . . . . ?
Cu2 S3 C11 C12 -168.2(5) . . . . ?
Cu3 S3 C11 C12 64.4(6) . . . . ?
 
_diffrn_measured_fraction_theta_max    0.997
_diffrn_reflns_theta_full              27.46
_diffrn_measured_fraction_theta_full   0.997
_refine_diff_density_max    0.727
_refine_diff_density_min   -0.775
_refine_diff_density_rms    0.119
#===END
